# Supplementary material for: Comparative effectiveness of anti-inflammatory and antiviral therapies on NLR and survival outcomes in severe COVID-19: multicenter retrospective study
Source: PeerJ. 2025 Sep 4;13:e20003. doi: 10.7717/peerj.20003 (PMC12422261; doi:10.7717/peerj.20003)
Supplement: Supplemental Information 1 [file peerj-13-20003-s001.xlsx]

## Sheet: all variables
Hospital/Center	ICU LOS (d)	First positive result date	Date of ICU admission	MV Duration (d)	Hospital LOS (d)	Age (years)	Gender	IBW (all) M;50 + (0.91 × [height in centimeters − 152.4]), F;45.5 + (0.91 × (height in centimeters − 152.4))	If female, pregnant?	Was patient Saudi or non-Saudi?	If not Saudi, was patient legal or illegal?	Nationality	Healthcare worker	Height (cm)	Weight (kg)	BMI	Did the case travel outside of Saudi?	Was the case in close contact with a person with fever a/or cough who has been to an affected area?	Has the case attended an event where a large number of people were present (i.e, wedding, umrah)?	Nosocomial infection (COVID 19 positive for inpatient previously admitted with another diagnosis)	No Clear source	Current smoker	Diabetes mellitus	Hypertension	Ischemic heart disease	Heart failure (ejection fraction < 50%)	Chronic Lung disease	Chronic obstructive pulmory disease (COPD)	Bronchial asthma	Chronic liver disease	Hemoglobinopathy	Chronic kidney disease (GFR < 60ml/min)	Renal replacement therapy (dialysis)	Post solid organ/bone marrow transplant	Immunocompromised status	Chronic hematologic disease	HIV/AIDS	Malignt neoplasm/cancer	Recent surgery (within 30 days)	If ECHO is available, date of ECHO	Left ventricle Ejection fraction (%)	Right ventricular dysfunction (strain, dilatation or dysfunction)	Right ventricle/pulmonary artery pressure available	Right Ventricular systolic pressure (mmHg)	Pulmory Artery systolic pressure (mmHg)	Pulmory artery mean pressure (mmHg)	Angiotensin converting enzyme inhibitors (ACEI)	Angiotensin II receptor blockers (ARB)	Antiplatelet
11	55	2020-06-22	2020-06-22	48.3736	72	55	1	62.376		2	1	1	2	166	85	30.8463	2	1	9999	2		9999	1	1	2	2	2	2	2	2	2	2	2	2	2	2	2	2	2								2	2	2
11	30	2020-07-24	2020-07-26	33.2188	65	33	1	66.016		1			2	170	118	40.8304	2	1	2	2	9999	2	2	2	2	2	2	2	2	2	2	2	2	2	2	2	2	2	2								2	2	2
11	32	2020-07-12	2020-07-17	31.4792	37	48	1	75.116		1			1	180	80	24.6914	2	1	2	2	9999	2	2	2	2	2	2	2	2	2	2	2	2	2	2	2	2	2	2								2	2	2
11	11	2020-08-07	2020-08-11	6.22917	12	36	1	61.466		1			2	165	70	25.7117	2	1	9999	9999	2	2	2	2	2	2	2	2	1	2	2	2	2	2	2	2	2	2	2								2	2	2
7	13	2020-03-14	2020-03-14	9.47917	24	57	1	62.376		1			2	166	94	34.1124	1	9999	2	2	2	1	1	1	2	2	2	2	2	2	2	2	2	2	2	2	2	2	2								9999	9999	2
7	7	2020-04-13	2020-05-01		34	71	1	68.746		1			1	173	84	28.0664	2	1	2	1	2	9999	2	1	1	2	2	2	2	2	2	2	2	2	2	2	2	2	2	2018-10-16	63	0	4				2	1	1
7	31	2020-05-07	2020-05-07	11.7292	31	39	2	55.146	2	2	1	2	2	163	85.1	32.0298	2	2	2	2	1	2	2	2	2	2	2	2	2	1	2	1	1	2	1	2	2	2	2								2	2	2
7	9	2020-05-11	2020-05-11		17	47	1	56.916		2	1	3	2	160	80	31.25	2	2	2	2	1	9999	2	2	2	2	2	2	2	2	2	2	2	2	2	2	2	2	2								9999	9999	9999
7	6	2020-05-12	2020-05-12	2.79167	6	46	1	66.016		2	1	1	2	170	75	25.9516	2	2	2	2	1	9999	2	2	2	2	2	2	2	2	2	2	2	2	2	2	2	2	2								9999	9999	9999
7	6	2020-05-12	2020-05-13		7	56	1	64.196		2	1	3	2	168	85	30.1162	2	2	2	2	1	9999	2	2	2	2	2	2	2	2	2	2	2	2	2	2	2	2	2								9999	9999	9999
7	5	2020-05-09	2020-05-14		9	59	2	49.686	2	2	1	4	2	157	95	34.57	2	2	2	2	1	2	1	1	2	2	2	2	2	2	2	1	1	2	2	2	2	2	2								9999	9999	9999
7	8	2020-05-15	2020-05-12	7.40347	8	31	1	61.516		2	1	2	2	170	80	27.6817	2	9999	9999	9999	1	9999	2	2	2	2	2	2	2	2	2	2	2	2	2	2	2	2	2								9999	9999	9999
7	3	2020-05-14	2020-05-16		5	57	1	52.416		2	1	3	2	180	75	23.1481	2	2	2	2	1	9999	1	2	2	2	2	2	2	2	2	2	2	2	2	2	2	2	2								9999	9999	9999
7	3	2020-05-12	2020-05-16		7	58	1	50.596		2	1	3	2	170	83	28.7197	2	2	2	2	1	9999	1	1	2	2	2	2	1	2	2	2	2	2	2	2	2	2	2								9999	9999	9999
7	4	2020-05-15	2020-05-15		4	57	1	47.866		2	1	1	2	164	90	33.4622	2	2	2	2	1	9999	2	2	2	2	2	2	2	2	2	2	2	2	2	2	2	2	2								9999	9999	9999
7	32	2020-05-15	2020-05-17	22.7292	69	22	1	51.506		1			2	167	168	60.2388	2	2	2	2	1	9999	2	2	2	2	2	2	2	2	2	2	2	2	2	2	2	2	2								2	2	2
7	2	2020-05-16	2020-05-17		5	74	1	38.766		2	1	5	2	155	90	37.461	2	2	2	2	1	1	1	1	2	1	2	2	2	2	2	2	2	2	2	2	2	2	2	2020-05-14	20	0	4				9999	9999	9999
7	6	2020-05-18	2020-05-18		15	52	1	56.966		2	1	3	2	170	92	31.8339	2	1	2	2	2	9999	1	1	2	2	2	2	2	2	2	2	2	2	2	2	2	2	2								9999	9999	9999
7	12	2020-05-15	2020-05-19	11.4792	16	55	1	47.866		2	1	3	2	165	80	29.3848	2	2	2	2	1	9999	1	1	2	2	2	2	2	2	2	2	2	2	2	2	2	2	2								9999	9999	9999
7	6	2020-05-15	2020-05-20		29	60	1	56.916		2		7	2	160	85	33.2031	2	2	2	2	1	9999	1	1	2	2	2	2	2	2	2	2	2	2	2	2	2	2	2								9999	9999	9999
7	17	2020-05-19	2020-05-21	11.7708	26	35	1	84.216		2	1	2	2	190	84	23.2687	2	2	2	2	1	2	2	2	2	2	2	2	2	2	2	2	2	2	2	2	2	2	2								2	2	2
7	12	2020-05-21	2020-05-21	9.5625	13	60	1	63.286		2	1	1	2	167	77	27.6095	2	2	2	2	1	9999	9999	9999	9999	9999	9999	9999	9999	9999	9999	9999	9999	9999	9999	9999	9999	9999	9999								9999	9999	9999
7	2	2020-05-16	2020-05-16	1.09722	2	45	1	47.816		2	1	7	2	150	70	31.1111	2	2	2	2	1	9999	2	2	2	2	2	2	2	2	2	2	2	2	2	2	2	2	2								2	2	2
7	2	2020-05-13	2020-05-22	1.90625	11	87	1	70.566		1			2	175	80	26.1224	2	2	2	2	1	9999	2	2	2	2	2	2	2	2	2	2	2	2	2	2	2	2	2								2	2	2
7	3	2020-05-22	2020-05-23		24	38	1	66.016		2	1	3	2	170	85	29.4118	2	2	2	2	1	9999	2	2	2	2	2	2	2	2	2	2	2	2	2	2	2	2	2								9999	9999	9999
7	14	2020-05-24	2020-05-24	12.8819	14	56	1	56.916		2	1	5	2	160	132	51.5625	2	2	2	2	1	9999	1	1	2	2	2	2	2	2	2	2	2	2	2	2	2	2	2								9999	9999	9999
7	2	2020-05-24	2020-05-24		22	47	1	56.916		2	1	3	2	160	65	25.3906	2	9999	9999	9999	1	9999	2	2	2	2	2	2	2	2	2	2	2	2	2	2	2	2	2								2	2	2
7	17	2020-05-21	2020-05-25	16.3889	21	59	1	66.016		2	1	2	2	170	89	30.7958	2	2	2	2	1	9999	2	2	2	2	2	2	2	2	2	2	2	2	2	2	2	2	2								2	2	2
7	5	2020-05-24	2020-05-25	4.11806	6	77	1	58.736		2	1	6	2	162	56	21.3382	2	2	2	2	1	9999	2	2	2	2	2	2	2	2	2	2	2	2	2	2	2	2	2								2	2	2
7	7	2020-05-25	2020-05-25	6.40625	7	34	1	56.916		2	1	3	2	160	77	30.0781	2	2	2	2	1	9999	2	2	2	2	2	2	2	2	2	2	2	2	2	2	2	2	2								9999	9999	9999
7	15	2020-05-25	2020-05-25	12.5646	30	79	2	61.516	2	1			2	170	67	23.1834	2	1	2	2	2	2	2	1	2	2	2	2	2	2	2	2	2	2	2	2	2	2	2								2	2	2
7	39	2020-05-25	2020-05-25	37.1667	39	54	1	61.516		2	1	3	2	156	75.5	31.024	2	2	2	2	1	9999	2	2	2	2	2	2	2	2	2	2	2	2	2	2	2	2	2								9999	9999	9999
7	13	2020-05-24	2020-05-25	5.85417	14	64	1	52.416		2	1	8	2	180	84	25.9259	2	2	2	2	1	9999	1	1	2	2	2	2	2	2	2	1	2	2	2	2	2	2	2								9999	9999	9999
7	13	2020-05-23	2020-05-27	6.45833	29	46	1	50.596		2	1	3	2	160	78	30.4688	2	1	2	2	2	9999	2	2	2	2	2	2	2	2	2	2	2	2	2	2	2	2	2								9999	9999	9999
7	10	2020-05-27	2020-05-27	9.14583	10	56	1	47.866		2	1	3	2	165	85	31.2213	2	2	2	2	1	9999	1	2	2	2	2	2	2	2	2	2	2	2	2	2	2	2	2								9999	9999	9999
7	25	2020-05-25	2020-05-28	16.2986	42	69	1	51.506		2	1	5	2	165	111	40.7713	2	1	2	2	2	9999	9999	9999	9999	9999	9999	9999	9999	9999	9999	9999	9999	9999	9999	9999	9999	9999	9999								9999	9999	9999
7	24	2020-05-28	2020-05-28	14.3125	48	44	1	38.766		2	1	3	2	160	60	23.4375	2	2	2	2	1	9999	9999	9999	9999	9999	9999	9999	9999	9999	9999	9999	9999	9999	9999	9999	9999	9999	9999								9999	9999	9999
7	24	2020-05-27	2020-05-27	22.8125	24	67	1	56.966		2	1	1	2	175	135	44.0816	2	2	2	2	1	9999	2	1	2	2	2	2	2	2	2	2	2	2	2	2	2	2	2								9999	9999	9999
7	6	2020-05-28	2020-05-28	5.84375	6	58	1	47.866		1			2	163	72	27.0993	2	2	2	2	1	9999	1	1	1	2	2	2	2	2	2	1	9999	2	2	2	2	2	2	2017-01-03	61	0	4				9999	9999	9999
7	11	2020-05-24	2020-05-29	9.9375	16	43	1	52.366		2	1	1	2	155	70	29.1363	2	2	2	2	1	9999	2	2	2	2	2	2	2	2	2	2	2	2	2	2	2	2	2								9999	9999	9999
7	22	2020-05-28	2020-05-30	21.0417	24	45	1	64.196		2	1	7	2	168	68	24.093	2	2	2	2	1	9999	2	2	2	2	2	2	2	2	2	2	2	2	2	2	2	2	2								2	2	2
7	24	2020-06-18	2020-06-18	6.54167	34	37	2	52.416	1	1			2	160	74	28.9062	2	2	2	2	2	2	2	2	2	2	2	2	2	2	2	2	2	2	2	2	2	2	2								9999	9999	9999
7	14	2020-05-27	2020-05-31		34	77	1	56.916		1			2	160	70	27.3438	2	2	2	2	1	9999	1	1	2	2	2	2	2	2	2	2	2	2	2	2	2	2	2								2	2	2
7	11	2020-05-30	2020-05-31	9.97847	13	52	1	64.196		2	1	7	2	168	75	26.5731	2	2	2	2	1	2	2	2	2	2	2	2	2	2	2	2	2	2	2	2	2	2	2								2	2	2
7	4	2020-05-31	2020-05-31		7	71	1	61.466		2	1	7	2	165	90	33.0579	2	2	2	2	1	9999	2	1	2	2	2	2	2	2	2	2	2	2	2	2	2	2	2								9999	9999	9999
7	19	2020-05-31	2020-05-31	6.08333	29	80	1	52.366		1			2	155	80	33.2986	2	2	2	2	1	9999	1	1	1	2	2	2	2	2	2	2	2	2	2	2	2	2	2								2	2	2
7	19	2020-05-30	2020-06-01	8.11458	33	72	2	50.596	2	1			2	158	81	32.4467	2	1	2	2	2	9999	1	1	2	2	2	2	2	2	2	2	2	2	2	2	2	2	2								9999	9999	9999
7	6	2020-06-01	2020-06-01		10	55	2	47.866	2	2	1	1	2	155	92	38.2934	2	2	2	2	1	9999	2	1	2	2	2	2	2	2	2	2	2	2	2	2	2	2	2								9999	9999	9999
7	17	2020-05-28	2020-06-03	15.75	23	67	1	56.916		2	1	1	2	160	63	24.6094	2	2	2	2	1	9999	1	2	2	2	2	2	2	2	2	2	2	2	2	2	2	2	2								2	2	2
7	7	2020-06-01	2020-06-01	4.41458	17	52	1	56.916		2	1	3	2	160	90	35.1562	2	2	2	2	1	9999	2	2	2	2	2	2	2	2	2	2	2	2	2	2	2	2	2								9999	9999	9999
7	18	2020-05-31	2020-06-02	16.5	20	50	1	64.196		2	1	1	2	168	97	34.3679	2	2	2	2	1	9999	2	2	2	2	2	2	2	2	2	2	2	2	2	2	2	2	2								2	2	2
7	11	2020-05-31	2020-06-03	10.4722	14	52	1	64.196		2	1	5	2	168	112	39.6825	2	2	2	2	1	9999	1	1	2	2	2	2	2	2	2	2	2	2	2	2	2	2	2								9999	9999	9999
7	6	2020-05-31	2020-06-03		18	49	1	63.741		2	1	1	2	167.5	100	35.6427	2	2	2	2	1	9999	2	2	2	2	2	2	2	2	2	2	2	2	2	2	2	2	2								9999	9999	9999
7	21	2020-06-01	2020-06-04	20.9583	24	65	1	64.196		1			2	168	92	32.5964	2	1	2	2	2	9999	1	1	1	1	2	2	2	2	2	2	2	2	2	2	2	2	2	2019-03-28	42	0	3			32.33	2	2	1
7	6	2020-06-04	2020-06-04	5.47014	6	60	1	66.016		1			2	170	91	31.4879	2	2	2	2	1	9999	2	2	2	2	2	2	2	2	2	2	2	2	2	2	2	2	2								9999	9999	9999
7	6	2020-05-31	2020-06-04	4.375	10	40	1	61.466		2	1	3	2	165	80	29.3848	2	1	2	2	2	2	2	2	2	2	2	2	2	2	2	2	2	2	2	2	2	2	2								2	2	2
7	13	2020-06-04	2020-06-05	11.1667	14	62	1	56.916		2	1	2	2	160	65	25.3906	2	2	2	2	1	9999	1	2	2	2	2	2	2	2	2	2	2	2	2	2	2	2	2								2	2	2
7	18	2020-06-04	2020-06-05	14.4278	19	53	1	52.366		2	1	3	2	155	60	24.974	2	2	2	2	1	9999	1	2	2	2	2	2	2	2	2	2	2	2	2	2	2	2	2								9999	9999	9999
7	28	2020-06-01	2020-06-05	23.7896	69	70	1	63.286		2	1	2	2	167	75	26.8923	2	2	2	2	1	9999	1	1	1	2	2	2	2	2	2	1	2	2	2	2	2	2	2								2	2	2
7	9	2020-05-29	2020-06-06		26	57	2	51.506	2	1			2	159	77.9	30.8137	2	1	2	2	2	2	2	2	2	2	2	2	2	2	2	2	2	2	2	2	2	2	2								2	2	2
7	8	2020-05-29	2020-06-06		24	66	2	38.766	2	1			2	145	88	41.8549	2	2	2	2	1	2	1	1	2	2	2	2	2	2	2	2	2	2	2	2	2	2	2								9999	9999	9999
7	56	2020-06-04	2020-06-07	37.2708	59	52	2	56.966	2	1			2	165	90	33.0579	2	2	2	2	1	2	1	1	1	2	2	2	2	2	2	2	2	2	2	2	2	2	2								9999	9999	9999
7	7	2020-06-04	2020-06-08		21	34	1	64.196		2	1	9	2	168	100	35.4308	2	2	2	2	1	2	2	2	2	2	2	2	2	2	2	2	2	2	2	2	2	2	2								2	2	2
7	10	2020-05-30	2020-06-12	7.22222	26	55	1	55.096		2	1	1	2	158	84	33.6485	2	1	2	2	2	9999	2	2	2	2	2	2	2	2	2	2	2	2	2	2	2	2	2								2	2	2
7	4	2020-06-01	2020-06-12	-0.368056	15	83	1	64.196		1			2	168	58	20.5499	2	2	2	2	1	9999	1	1	1	2	2	2	2	2	2	2	2	2	2	2	2	2	2								2	2	2
7	4	2020-06-14	2020-06-15		11	61	1	51.456		2	1	1	2	154	64	26.986	2	2	2	2	1	9999	1	1	2	2	2	2	2	2	2	2	2	2	2	2	2	2	2								9999	9999	9999
7	4	2020-06-11	2020-06-16		21	62	1	66.016		2	1	4	2	170	82	28.3737	2	2	2	2	1	9999	2	2	2	2	2	2	2	2	2	2	2	2	2	2	2	2	2								9999	9999	9999
7	9	2020-06-15	2020-06-16		20	52	1	56.916		2	1	5	2	160	86	33.5938	2	2	2	2	1	9999	1	2	2	2	2	2	2	2	2	2	2	2	2	2	2	2	2								2	2	2
7	4	2020-06-21	2020-06-22		5	75	2	47.866	2	1			2	155	80	33.2986	2	2	2	2	1	2	1	1	2	2	2	2	2	2	2	1	2	2	2	2	2	2	2	2020-02-18	50	0	1	47.74			2	2	1
7	10	2020-06-28	2020-06-30	7.41667	20	39	1	49.636		2	1	5	2	152	66	28.5665	2	2	2	2	1	2	2	2	2	2	2	2	2	2	2	2	2	2	2	2	2	2	2								2	2	2
7	2	2020-06-30	2020-07-01		8	37	1	66.016		2	1	6	2	170	72	24.9135	2	2	2	2	1	9999	2	2	2	2	2	2	2	2	2	2	2	2	2	2	2	2	2								2	2	2
7	17	2020-06-06	2020-06-08	6.05556	40	64	2	52.416	2	1			2	160	68	26.5625	2	1	2	2	2	2	1	1	2	2	2	2	1	2	2	2	2	2	2	2	2	2	2								9999	9999	9999
7	11	2020-06-09	2020-06-10	6.30903	12	63	1	54.186		2	1	10	2	157	73	29.6158	2	2	2	2	1	2	2	2	2	2	2	2	2	2	2	2	2	2	2	2	2	2	2								9999	9999	9999
7	25	2020-06-12	2020-06-12	21.4097	39	37	1	78.756		1			2	184	104	30.7183	2	2	2	2	1	9999	2	2	2	2	2	2	2	2	2	2	2	2	2	2	2	2	2								9999	9999	9999
7	18	2020-06-06	2020-06-14	3.27153	47	79	1	56.916		1			2	160	63	24.6094	2	1	2	2	2	9999	1	1	2	2	2	2	2	2	2	2	2	2	2	2	2	2	2								9999	9999	9999
7	15	2020-06-11	2020-06-14	6.04861	28	37	1	56.916		1			2	160	155	60.5469	2	2	2	2	1	9999	2	2	2	2	2	2	2	2	2	2	2	2	2	2	2	2	2								9999	9999	9999
7	16	2020-06-12	2020-06-14	12.0903	22	63	2	56.966	2	1			2	165	92	33.7925	2	1	2	2	2	2	1	1	2	2	2	2	2	2	2	2	2	2	2	2	2	2	2								9999	9999	9999
7	1	2020-07-17	2020-07-21		11	74	1	56.916		2	1	5	2	160	67.3	26.2891	2	2	2	2	1	1	1	2	2	2	2	2	2	2	2	2	2	2	2	2	2	2	2								2	2	2
7	18	2020-06-19	2020-06-23	11.5	28	58	1	61.466		1			2	165	168	61.708	2	1	2	2	2	9999	2	1	2	2	2	2	2	2	2	2	2	2	2	2	2	2	2								9999	9999	9999
7	11	2020-06-24	2020-06-24	8.20139	13	63	1	60.556		1			2	164	66	24.539	2	2	2	2	1	1	2	2	2	2	2	2	2	2	2	2	2	2	2	2	2	2	2								9999	9999	9999
7	6	2020-06-21	2020-06-26		19	36	1	66.016		2	1	1	2	170	71	24.5675	2	2	2	2	1	9999	2	2	2	2	2	2	2	2	2	2	2	2	2	2	2	2	2								2	2	2
7	21	2020-06-14	2020-06-20	19.3438	27	46	2	50.596	2	1			2	158	82	32.8473	2	1	2	2	2	2	1	1	2	2	2	2	2	2	2	1	1	2	2	2	2	2	2								9999	9999	9999
7	17	2020-06-18	2020-06-18	11.5	17	61	1	61.466		2	1	5	2	165	73	26.8136	2	1	2	2	2	1	2	2	2	2	2	2	2	2	2	2	2	2	2	2	2	2	2								2	2	2
7	4	2020-06-29	2020-07-01		8	45	1	63.286		1			2	167	80	28.6851	2	2	2	2	1	9999	1	2	2	2	2	2	2	2	2	2	2	2	2	2	2	2	2								2	2	2
7	3	2020-06-29	2020-06-30		11	45	1	61.466		1			2	165	110	40.404	2	2	2	2	1	9999	1	2	2	2	2	2	2	2	2	2	2	2	2	2	2	2	2								2	2	2
7	4	2020-06-26	2020-06-28		11	59	2	47.866	2	1			2	155	85	35.3798	2	1	2	2	2	2	2	2	2	2	2	2	2	2	2	2	2	2	2	2	2	2	2								2	2	2
7	6	2020-07-02	2020-07-06		14	61	1	63.286		2	1	7	2	167	93.6	33.5616	2	1	2	2	2	2	2	2	2	2	2	2	2	2	2	2	2	2	2	2	2	2	2								2	2	2
7	12	2020-07-17	2020-07-18	11.5486	13	61	1	59.646		2	1	5	2	163	73	27.4756	2	2	2	2	1	9999	2	1	2	2	2	2	2	2	2	1	1	2	2	2	2	2	2								2	2	2
7	8	2020-06-29	2020-07-04		14	54	2	45.136	2	1			2	152	85	36.7902	2	1	2	2	2	2	2	2	2	2	2	2	1	2	2	2	2	2	2	2	2	2	2								2	2	2
7	7	2020-07-01	2020-07-04		11	40	1	74.206		2	1	11	2	179	90	28.089	2	2	2	2	1	9999	1	2	2	2	2	2	2	2	2	2	2	2	2	2	2	2	2								2	2	2
7	8	2020-07-15	2020-07-23		9	61	2	52.416	2	2	1	7	1	160	72	28.125	2	1	2	2	2	2	1	1	2	2	2	1	2	2	2	2	2	2	2	2	2	2	2								2	1	2
7	57	2020-07-12	2020-07-15		57	62	1	61.466		2	1	7	1	165	65	23.8751	2	1	2	2	2	2	1	1	2	2	2	2	2	2	2	2	2	2	2	2	2	2	2								2	2	2
7	6	2020-07-06	2020-07-10		23	60	2	50.596	2	1			2	158	67.15	26.8987	2	2	2	2	1	2	1	1	2	2	2	2	2	2	2	2	2	2	2	2	2	2	2								1	2	2
7	17	2020-07-20	2020-07-20		27	42	1	66.016		1			2	170	114	39.4464	2	2	2	2	1	9999	1	2	2	2	2	2	1	2	2	2	2	2	2	2	2	2	2								2	2	2
7	9	2020-07-03	2020-07-04	1.00694	19	50	1	66.016		2	1	2	2	170	80	27.6817	2	2	2	2	1	2	2	2	2	2	2	2	2	2	2	2	2	2	2	2	2	2	2								2	2	2
7	15	2020-07-17	2020-07-20	14.5	18	68	1	66.016		2	1	5	2	170	68	23.5294	2	2	2	2	1	2	1	1	2	2	2	2	2	2	2	2	2	2	2	2	2	2	2								2	2	2
7	2	2020-07-07	2020-07-13		9	50	2	51.506	2	1			2	159	76	30.0621	2	1	2	2	2	2	1	2	2	2	2	2	2	2	2	2	2	2	2	2	2	2	2								2	2	2
7	7	2020-07-13	2020-07-23		21	58	1	67.836		1			2	172	92	31.0979	2	2	2	2	1	1	2	1	2	2	2	2	2	2	2	2	2	2	1	2	2	2	2								2	2	2
7	9	2020-07-09	2020-07-12	5.54167	17	54	1	66.016		2	1	7	2	170	83	28.7197	2	2	2	2	1	9999	2	1	2	2	2	2	2	2	2	2	2	2	2	2	2	2	2								9999	9999	9999
7	4	2020-07-11	2020-07-23	1.25694	29	79	1	66.016		1			2	170	76	26.2976	2	2	2	2	1	9999	1	1	2	2	2	2	2	2	2	2	2	2	2	2	2	2	2								2	2	2
7	3	2020-07-03	2020-07-29	22.5	3	67	1	80.576		1			2	186	80	23.1241	2	2	2	2	1	9999	9999	9999	9999	9999	9999	9999	9999	9999	9999	9999	9999	9999	9999	9999	9999	9999	9999								9999	9999	9999
1	1	2020-03-28	2020-03-30		11	91	1	64.196		1			2	168	55	19.487	2	2	2	2	1	2	1	1	2	2	2	2	2	2	2	2	2	2	2	2	2	2	2								1	2	2
1	12	2020-03-19	2020-03-26	5.375	22	74	1	56.916		1			2	160	93	36.3281	2	2	1	1	2	1	2	1	1	1	2	2	2	2	2	2	2	2	2	2	2	2	2	2019-12-24	45	0	1	33			2	1	1
1	29	2020-03-19	2020-03-28	18.5667	47	85	1	66.016		1			2	170	90	31.1419	2	1	2	2	2	2	2	1	1	1	2	2	2	2	2	1	2	2	2	2	2	2	2								1	2	1
1	3	2020-04-03	2020-04-04		40	84	1	53.276		1			2	156	52	21.3675	2	2	2	2	1	2	2	1	2	2	2	2	1	1	2	1	1	2	2	2	2	2	2								2	2	2
1	4	2020-04-12	2020-04-13		18	71	1	69.656		1			2	174	78.7	25.9942	2	2	1	2	2	2	2	1	2	2	2	2	2	2	2	2	2	2	1	2	2	2	2	2019-11-21	55	0	1	35			2	2	2
1	8	2020-04-13	2020-04-14		22	61	2	52.416	2	1			2	160	60	23.4375	2	1	2	2	2	2	1	1	1	2	2	2	2	2	2	1	2	2	2	2	2	2	2	2020-01-20	62	0	1	29			2	1	1
1	6	2020-04-20	2020-04-22		20	48	2	36.946	2	2	1		1	143	65	31.7864	2	1	2	2	2	2	2	1	2	2	2	2	2	2	2	2	2	2	2	2	2	2	2								1	2	2
1	4	2020-05-10	2020-05-14		9	41	2	42.406	1	2	1	7	1	149	78.6	35.4038	2	1	2	2	2	2	2	2	2	2	2	2	2	2	2	2	2	2	2	2	2	2	2								2	2	2
1	10	2020-05-11	2020-05-14		18	79	1	56.916		1			2	160	79.7	31.1328	2	2	2	2	2	2	1	1	2	2	2	2	2	2	2	2	2	2	2	2	2	2	2	2018-09-02	55	0	4				2	1	2
1	7	2020-05-16	2020-05-21		13	48	1	56.916		1			2	160	91.2	35.625	2	2	9999	2	1	1	2	2	2	2	2	2	2	1	2	2	2	2	2	2	2	2	2								2	2	2
1	6	2020-05-20	2020-05-22		14	48	2	48.776	2	1			2	156	110.3	45.3238	2	1	9999	2	2	2	1	1	2	2	2	2	1	2	2	1	2	2	1	2	2	2	2	2020-03-05	55	0	4				2	1	2
1	4	2020-05-18	2020-05-20	3.45972	6	43	2	56.056	2	1			2	164	100	37.1802	2	1	2	2	2	2	2	2	2	2	2	2	2	2	2	2	2	2	2	2	2	2	2								2	2	2
1	36	2020-05-23	2020-05-23	15.3389	40	60	1	66.016		1			2	170	103	35.6401	2	2	9999	2	1	2	1	2	2	2	2	2	2	2	2	2	2	2	2	2	2	2	2								2	2	2
1	16	2020-05-22	2020-05-23	5.64583	21	79	2	54.236	2	1			2	162	96	36.5798	2	2	2	2	1	2	1	1	2	2	2	2	1	2	2	2	2	2	2	2	2	2	2	2019-08-27	55	0	4				2	1	1
1	17	2020-05-24	2020-05-24	11.0597	20	61	1	76.936		1			2	182	86.2	26.0234	2	2	2	2	1	1	1	1	2	2	2	2	2	2	2	2	2	2	2	2	2	2	2								2	1	1
1	19	2020-05-25	2020-05-26	17.2917	19	44	2	52.416	2	1			2	160	82.9	32.3828	2	2	2	1	2	2	2	2	2	2	2	2	2	1	2	2	2	2	1	2	2	2	2	2018-09-04		0	4				9999	9999	9999
1	37	2020-05-25	2020-05-29	27.1458	50	77	1	76.936		1			2	182	105	31.6991	2	2	2	2	2	2	1	1	2	2	2	2	2	2	2	1	2	2	2	2	2	2	2	2016-08-10	55	0	4				2	2	2
1	5	2020-05-26	2020-05-30		16	39	1	63.286		1			2	167	158	56.6532	2	2	2	2	2	2	2	1	2	1	2	2	2	2	2	2	2	2	2	2	2	2	2	2016-05-01	35	1	4				1	2	2
1	3	2020-05-28	2020-05-28		10	57	2	46.046	2	1			2	153	88.7	37.8914	2	2	9999	9999	1	2	1	1	2	2	2	2	2	2	2	2	2	2	2	2	2	2	2								2	2	2
1	11	2020-05-26	2020-05-28		13	59	2	46.046	2	1			2	153	78.4	33.4914	9999	9999	9999	9999	9999	2	1	2	2	2	2	2	2	2	2	2	2	2	2	2	2	1	2	2016-06-06	55		4				1	2	2
1	4	2020-05-27	2020-05-31		10	70	1	56.916		1			2	160	63	24.6094	2	2	9999	9999	2	2	1	1	1	2	2	2	2	2	2	2	2	2	2	2	2	2	2	2015-12-23	55	0	4				2	1	2
1	41	2020-05-30	2020-06-04	39.125	45	81	1	62.376		1			2	166	72.1	26.1649	2	1	9999	2	2	2	1	1	1	2	2	2	2	2	2	1	2	2	2	2	2	2	2	2014-02-16	45	0	5				2	1	2
1	30	2020-05-30	2020-06-03	24.125	44	33	2	31.85	2	1			2	137.4	71.6	37.9262	2	1	2	2	2	2	2	2	2	2	1	2	1	2	2	2	2	2	2	2	2	2	2	2018-08-07	55	1	5				2	2	2
1	5	2020-05-30	2020-06-06		14	54	2	52.416	2	1			2	160	96.7	37.7734	2	1	2	2	2	2	2	2	2	2	2	2	1	2	2	2	2	2	2	2	2	2	2								2	2	2
1	15	2020-05-26	2020-06-03	7.98958	22	49	2	52.416	2	1			2	160	80	31.25	2	1	2	2	2	2	1	1	2	2	2	2	2	2	2	2	2	2	2	2	2	2	2								1	2	2
1	12	2020-06-03	2020-06-05		20	67	1	72.386		1			2	177	77	24.5779	2	2	2	2	1	2	1	1	2	2	2	2	2	2	2	2	2	2	2	2	2	2	2								2	1	2
1	7	2020-06-05	2020-06-06		23	62	1	75.116		1			2	180	135	41.6667	2	2	9999	2	1	2	1	1	1	2	2	2	1	2	2	2	2	2	2	2	2	2	2								2	1	1
1	6	2020-05-30	2020-06-09		16	53	1	61.466		1			2	165	59	21.6713	2	9999	9999	2	1	2	1	1	1	1	2	2	2	2	2	1	1	1	1	2	2	2	2	2019-12-12	20	0	1	40			2	2	1
1	9	2020-06-06	2020-06-06		20	75	2	56.966	2	1			2	165	98.5	36.18	2	1	1	2	2	2	2	2	2	2	2	2	2	2	2	2	2	2	2	2	2	1	2	2019-09-24	55	0	4				2	2	2
1	6	2020-05-20	2020-05-28		17	56	1	56.916		2	1	7	1	160	69	26.9531	2	2	9999	2	1	2	2	1	2	2	2	2	2	2	2	2	2	2	2	2	2	2	2								2	2	2
1	15	2020-05-29	2020-06-06	9.78819	29	54	2	53.326	2	1			2	161	82.4	31.7889	2	1	9999	2	2	2	1	1	2	2	2	2	2	2	2	2	2	2	2	2	2	2	2								2	1	2
1	115	2020-05-31	2020-05-31	114.359	115	59	1	66.926		2	1	11	2	171	112	38.3024	2	1	2	2	2	2	1	1	2	2	2	2	2	2	2	1	2	2	2	2	2	2	2	2013-09-26	55	0	4				2	1	1
1	61	2020-05-30	2020-06-27	58.6458	78	64	2	46.956	2	1			2	154	102	43.0089	2	1	2	2	2	2	2	2	2	2	2	2	2	2	2	2	2	2	1	2	2	2	2								2	2	2
1	59	2020-06-10	2020-06-10	57.7083	59	18	1	48.726		1			2	151	89	39.0334	2	2	9999	2	1	2	2	2	2	2	2	2	1	2	2	2	2	2	2	2	2	2	2	2018-10-25	55	0	4				2	2	2
1	10	2020-06-11	2020-06-17		21	86	1	63.286		1			2	167	80	28.6851	2	2	9999	2	1	2	1	2	2	2	2	2	2	2	2	2	2	2	2	2	2	2	2	2013-04-20	55	0	5				2	2	2
1	6	2020-06-11	2020-06-11	5.29167	6	65	1	66.016		2	2	11	2	170	70	24.2215	2	2	9999	2	1	2	2	2	2	2	2	2	2	2	2	2	2	2	2	2	2	2	2								9999	9999	9999
1	11	2020-06-14	2020-06-16		23	66	1	47.816		1			2	150	75.2	33.4222	2	2	9999	2	1	2	2	2	2	2	2	2	2	2	2	2	2	2	2	2	2	2	2								2	2	2
1	7	2020-06-16	2020-06-17		12	61	2	47.866	2	1			2	155	123.8	51.5297	2	1	9999	2	2	2	1	1	1	2	2	2	2	2	2	2	2	2	2	2	2	2	2	2015-04-30	55	0	5				2	2	1
1	15	2020-06-16	2020-06-16		21	91	1	56.006		1			2	159	62	24.5243	2	1	2	2	2	2	2	1	2	2	2	2	2	2	2	2	2	2	2	2	2	1	2	2020-11-17	55	0	5				1	2	2
1	5	2020-06-16	2020-06-21		16	48	1	64.196		1			2	168	83	29.4076	2	1	9999	2	2	2	2	1	2	2	2	2	2	2	2	2	2	2	1	2	2	2	2	2013-01-16	55	0	4				1	2	2
1	7	2020-06-15	2020-06-17		11	65	1	70.566		2	1	5	2	175	86	28.0816	2	2	9999	2	1	2	1	1	2	2	2	2	2	2	2	2	2	2	2	2	2	2	2								2	1	2
1	4	2020-06-15	2020-06-17		11	57	1	55.096		2	1	1	2	158	72	28.8415	2	1	9999	2	2	2	1	1	1	2	2	2	2	2	2	1	2	2	2	2	2	2	2	2020-01-27	55	0	1	35			2	1	1
1	5	2020-06-19	2020-06-22		14	37	1	66.016		1			2	170	110	38.0623	2	2	9999	9999	9999	2	2	2	2	2	1	2	2	2	2	2	2	2	1	2	2	2	2								2	2	2
1	7	2020-06-13	2020-06-23		12	49	1	65.106		2	1	7	2	169	85	29.7609	2	1	9999	2	2	2	1	2	2	2	2	2	2	2	2	2	2	2	1	2	2	2	2								2	2	2
1	2	2020-06-21	2020-06-28		11	54	1	75.116		2	2	24	1	180	90	27.7778	2	2	9999	9999	1	2	2	2	2	2	2	2	2	2	2	2	2	2	1	2	2	2	2	2012-10-01	55	0	4				2	2	2
1	15	2020-06-30	2020-07-01	8.20833	24	62	2	45.136	2	1			2	152	102	44.1482	2	1	2	2	2	2	1	2	2	2	2	2	2	2	2	2	2	2	1	2	2	2	2								2	2	2
1	17	2020-05-30	2020-05-31	11.8653	22	35	2	48.776	2	1			2	156	99	40.6805	2	1	2	2	2	2	2	2	2	2	2	2	1	2	2	2	2	2	2	2	2	2	2								2	2	2
1	2	2020-06-25	2020-07-03		13	54	2	46.046	2	1			2	153	68.5	29.2622	2	2	9999	9999	9999	2	1	2	2	2	2	1	2	2	2	2	2	2	2	2	2	2	9999	2015-12-03	55		4				2	2	2
1	16	2020-07-03	2020-07-04	11.9799	25	67	1	63.286		1			2	167	64.6	23.1633	2	1	2	2	2	2	1	2	2	2	2	2	2	2	2	2	2	2	2	2	2	2	2								2	2	2
1	5	2020-06-28	2020-06-30		10	15	1	38.716		1			2	140	36	18.3673	2	2	9999	9999	9999	2	2	2	2	2	2	2	2	2	2	2	2	2	2	2	2	2	9999	2016-07-28	60	0	4				9999	9999	9999
1	4	2020-06-17	2020-06-17		34	74	2	40.586	2	1			2	147	71.2	32.9492	2	1	9999	9999	9999	2	2	1	2	2	2	2	2	2	2	2	2	2	2	2	2	1	2	2016-01-11	55	0	4				2	1	2
1	6	2020-07-06	2020-07-06		13	66	1	58.736		2	1	19	2	162	58	22.1003	2	1	9999	2	2	2	1	1	2	2	2	2	2	2	2	2	2	2	2	2	2	2	2								1	2	1
1	34	2020-07-04	2020-07-05	28.9014	34	64	2	52.416	2	1			2	160	95.1	37.1484	2	2	9999	9999	9999	2	1	1	2	2	2	2	2	2	2	1	1	2	2	1	2	2	2	2020-04-12	55	0	4				2	2	2
1	20	2020-06-29	2020-07-01	15.2792	64	64	2	45.682	2	1			2	152.6	53.9	23.1462	2	2	9999	9999	9999	2	1	1	2	2	2	2	2	2	2	1	9999	2	1	2	2	1	2	2020-05-20	55	0	4				1	2	2
1	8	2020-06-25	2020-06-26		16	36	1	56.006		1			2	159	64	25.3155	2	2	9999	9999	9999	2	2	2	1	1	2	2	2	2	2	2	2	1	1	2	2	2	2	2019-12-18	35	0	4				2	1	1
1	7	2020-06-14	2020-06-25		9	75	1	63.286		1			2	167	86	30.8365	2	1	9999	9999	9999	2	1	1	2	2	2	2	2	2	2	2	2	2	2	2	2	2	2	2019-07-10	55	1	4				2	1	2
1	13	2020-06-22	2020-06-22	6.15625	28	54	2	48.776	2	1			2	156	98	40.2696	9999	9999	9999	9999	9999	2	1	1	2	2	2	2	2	2	2	1	2	2	1	2	2	1	2	2020-03-06	55	0	4		40		2	1	2
1	71	2020-06-19	2020-06-18	60.8236	103	65	1	71.476		1			2	176	68.2	22.017	2	2	9999	9999	9999	2	1	1	2	2	2	2	2	2	2	2	2	2	2	2	2	2	2								9999	9999	2
1	31	2020-06-29	2020-06-29	23.8604	31	67	1	59.191		1			2	162.5	80	30.2959	2	1	2	2	2	2	1	2	1	2	1	2	2	2	2	2	2	1	1	2	2	2	2	2019-08-28	55	0	1	50			2	2	2
1	26	2020-06-18	2020-06-19	22.0625	27	86	1	68.746		1			2	173	90	30.0712	2	1	2	2	2	2	2	1	2	2	2	2	2	2	2	2	2	2	2	2	2	2	2								2	2	2
1	24	2020-06-06	2020-06-07	9.59097	75	84	1	69.656		1			2	174	86	28.4053	2	9999	9999	2	1	2	1	2	2	2	2	2	2	2	2	1	2	2	2	2	2	2	2	2020-05-28	55	0	4				2	2	2
1	46	2020-06-27	2020-06-30	17.841	51	63	1	66.016		1			2	170	56.4	19.5156	2	1	2	2	1	2	2	1	2	2	2	2	2	2	2	2	2	2	2	2	2	1	2	2019-01-02	55	0	1	30			2	2	2
1	34	2020-06-28	2020-07-06	33.3583	41	48	1	55.096		1			2	158	80	32.0461	2	1	2	2	2	2	1	1	2	2	2	2	2	2	2	1	2	1	1	2	2	2	2	2016-01-07	55	0	4				2	2	1
1	15	2020-06-30	2020-07-01	8.21944	23	62	2	45.136	2	1			2	152	102	44.15	2	1	2	2	2	2	1	1	2	2	2	2	2	2	2	2	2	2	1	2	2	2	2								2	2	2
1	11	2020-05-28	2020-06-02	7.11806	16	49	2	49.686	2	2	1	7	2	157	70	28.3987	2	9999	9999	9999	9999	2	1	2	2	2	2	2	2	2	2	2	2	2	2	2	2	2	2								2	2	2
1	22	2020-05-31	2020-06-03	10.0208	51	64	2	56.966	2	1			2	165	80	29.3848	2	1	9999	9999	9999	2	1	1	2	2	2	2	2	2	2	2	2	2	2	2	2	2	2	2014-11-10	55	0	4				1	2	1
1	4	2020-06-09	2020-06-18		12	48	1	59.646		2	1	7	2	163	76	28.6048	2	1	9999	9999	9999	2	1	2	2	2	2	2	2	2	2	2	2	2	2	2	2	2	2								2	2	2
1	11	2020-07-08	2020-07-13	5.92708	15	74	1	61.466		1			2	165	72	26.4463	2	2	9999	9999	9999	2	1	1	2	2	2	2	2	2	2	1	2	2	2	2	2	2	2		55	0	4				2	2	2
1	4	2020-07-10	2020-07-10		12	31	2	43.316	2	1			2	150	80	35.5556	2	1	9999	9999	9999	2	2	2	2	2	2	2	2	2	2	2	2	2	2	2	2	2	2								2	2	2
1	7	2020-07-17	2020-07-17		7	77	2	46.046	2	1			2	153	58	24.7768	2	1	9999	9999	9999	2	1	1	1	2	2	2	2	2	2	2	2	2	1	2	2	2	9999	2016-03-09	45	0	4				1	2	2
1	6	2020-07-17	2020-07-18		7	72	1	61.466		1			2	165	78.5	28.8338	2	2	9999	9999	9999	2	2	1	2	2	2	2	2	2	2	2	2	2	2	1	2	2	2								2	1	2
1	6	2020-07-18	2020-07-18		7	37	2	54.236	1	1			2	162	83	31.6263	2	1	9999	9999	9999	2	1	2	2	2	2	2	2	2	2	2	2	2	2	2	2	2	2								2	2	2
1	6	2020-06-14	2020-06-15		15	48	1	68.746		1			2	173	84	28.0664	2	2	9999	9999	9999	2	1	2	2	2	2	2	2	2	2	2	2	2	2	2	2	2	2								2	2	2
1	9	2020-06-01	2020-06-06		14	62	1	63.286		1			2	167	92	32.9879	2	1	9999	9999	9999	2	1	1	2	2	2	2	2	2	2	2	2	2	2	2	2	2	2	2019-07-17	50	0	4				1	2	2
1	3	2020-06-06	2020-06-07		10	63	2	47.866		1			2	155	110	45.7856	2	2	9999	9999	9999	2	2	1	2	2	2	2	2	2	2	2	2	2	2	2	2	2	2								2	2	2
1	17	2020-08-09	2020-08-13		24	45	2	44.226	2	1			2	151	101	44.2963	2	2	9999	9999	9999	2	2	1	2	2	2	2	1	2	2	1	2	1	1	2	2	2	2	2014-07-22	55	1	4				2	2	1
1	12	2020-07-19	2020-08-07		21	33	1	44.226		1			2	165	107	39.3021	2	1	9999	9999	9999	2	2	2	2	2	2	2	2	2	2	2	2	2	1	2	2	1	2	2020-07-13		0	5				2	2	2
1	4	2020-08-07	2020-08-07		8	37	1	68.746		1			2	173	102.3	34.1809	2	2	9999	9999	9999	2	2	2	2	2	2	2	2	2	2	1	2	2	1	2	2	1	2								2	2	2
1	19	2020-08-05	2020-08-06		25	41	1	79.666		1			2	185	125	36.523	2	2	2	2	1	2	2	2	2	2	2	2	2	2	2	2	2	2	2	2	2	1	2								2	2	2
1	25	2020-08-03	2020-08-04		25	70	1	53.276		1			2	156	70	28.764	2	1	9999	9999	9999	2	2	1	1	1	2	2	2	2	2	1	2	2	1	2	2	1	2	2020-01-05	25	0	4				2	2	2
1	7	2020-08-11	2020-08-11		32	85	1	67.836		1			2	172	70	23.6614	2	1	2	2	2	2	1	1	2	2	2	2	2	2	2	2	2	2	1	2	2	1	2	2019-11-14	55	0	4				2	2	2
1	5	2020-08-10	2020-08-15		8	48	1	58.736		2	1	7	2	162	81	30.8642	2	2	2	2	1	2	1	2	2	2	2	2	1	2	2	2	2	2	2	2	2	2	2								2	2	2
1	26	2020-07-15	2020-07-16	20.3215	28	41	1	80.576		1			2	186	80	23.1241	2	2	2	2	1	2	2	2	2	2	2	2	2	1	2	2	2	2	2	2	2	2	2								2	2	2
1	5	2020-06-27	2020-07-04		18	73	1	61.466		1			2	165	67	24.6097	2	2	2	2	1	2	1	1	2	2	2	2	2	2	2	2	2	2	1	2	2	1	2								2	2	2
1	3	2020-08-14	2020-08-14		9	54	1	63.286		1			2	167	79	28.3266	2	1	2	2	2	2	1	1	1	1	2	2	2	2	2	2	2	2	2	2	2	2	2	2014-05-29	35	0	5				2	1	1
1	3	2020-08-09	2020-08-17		8	57	2	48.776	2	2	1	7	2	156	59	24.2439	2	1	2	2	2	2	2	1	2	2	2	2	2	2	2	2	2	2	2	2	2	2	2								2	1	2
1	6	2020-08-16	2020-08-17		10	79	2	46.046	2	1			2	153	93	39.7283	2	2	2	2	1	2	1	1	1	2	2	2	2	2	2	2	2	2	2	2	2	2	2	2018-12-12	50	0	4				2	1	1
1	22	2020-08-16	2020-08-16	11.6458	25	63	2	51.506	2	1			2	159	80	31.6443	9999	9999	9999	9999	9999	2	1	2	2	2	2	2	2	2	2	2	2	2	2	2	2	2	2	2015-04-13	55	0	4				2	2	2
1	14	2020-08-16	2020-08-16		17	49	2	54.236	2	1			2	162	124	47.2489	2	1	9999	9999	9999	2	1	1	2	2	2	2	2	2	2	2	2	2	2	2	2	2	2								2	2	2
1	32	2020-08-12	2020-08-19		54	70	2	51.506	2	1			2	159	59.2	23.4168	2	1	1	9999	9999	2	1	1	2	2	2	2	2	1	2	2	2	2	2	2	2	2	2								2	2	2
1	59	2020-08-09	2020-08-10	58.9972	60	49	1	56.916		1			2	160	91	35.5469	2	1	9999	9999	9999	2	1	2	2	2	2	2	2	1	2	2	2	1	1	2	2	1	2	2018-05-02	55	0	5				2	2	2
1	8	2020-08-22	2020-08-23		18	66	1	66.926		1			2	171	81.5	27.8718	2	1	2	2	2	2	1	1	2	2	2	2	2	2	2	2	2	1	1	2	2	2	2								2	1	2
1	13	2020-08-13	2020-08-18		20	49	1	56.916		1			2	160	120	46.875	2	1	2	2	2	2	1	1	1	2	2	2	2	2	2	2	2	2	2	2	2	2	2								2	1	1
1	12	2020-08-18	2020-08-22	6.58333	16	60	1	49.636		1			2	152	80	34.626	2	1	2	2	2	2	2	2	2	2	2	2	2	1	2	2	2	2	2	2	2	2	2	2019-09-29	75	0	5				2	2	2
1	7	2020-08-08	2020-08-19		17	43	1	77.846		2	1	10	1	183	103	30.7564	2	2	1	2	2	2	2	2	2	2	2	2	2	2	2	2	2	2	2	2	2	2	2								2	2	2
1	27	2020-08-24	2020-08-28	10.125	32	47	2	61.516		2	1	8	2	170	130	44.9827	2	2	9999	2	1	2	2	2	2	2	2	2	1	2	2	2	2	2	2	2	2	2	2								2	2	2
1	17	2020-06-04	2020-06-04	15.5167	22	41	1	66.016		2	1	13	2	170	90	31.1419	9999	9999	9999	9999	1	1	2	2	2	2	2	2	2	2	2	2	2	2	2	2	2	2	2								2	2	2
1	8	2020-08-22	2020-08-26		19	65	1	63.286		1			2	167	68	24.3824	2	2	9999	9999	9999	2	1	1	1	2	2	2	2	1	2	1	1	1	1	2	2	2	2	2020-02-05	55	0	1	40			2	2	1
1	41	2020-08-30	2020-09-02		52	72	1	67.836		1			2	172	70	23.6614	2	1	1	9999	9999	2	1	2	2	2	1	2	2	2	2	2	2	2	2	2	2	2	2	2018-10-01	55	0	4				2	2	2
1	6	2020-09-05	2020-09-07		12	58	1	75.116		1			2	180	73.5	22.6852	2	1	9999	9999	9999	2	1	1	2	2	2	2	2	2	2	2	2	2	2	2	2	2	2								2	1	2
1	8	2020-09-30	2020-09-29		15	52	1	76.936		1			2	182	110	33.2085	9999	9999	9999	9999	9999	2	2	2	2	2	2	2	2	2	2	2	2	2	2	1	2	2	9999								9999	9999	9999
1	28	2020-10-12	2020-10-13		29	46	1	51.456		1			2	154	98.6	41.5753	2	2	9999	9999	9999	2	1	1	1	2	2	2	2	2	2	1	2	1	1	2	2	2	2	2019-10-20	35	1	4				1	2	1
1	21	2020-10-10	2020-10-12		23	71	1	61.466		1			2	165	105	38.5675	2	2	9999	9999	9999	2	2	2	2	2	2	2	2	2	2	2	2	2	2	2	2	1	2								2	2	2
1	4	2020-10-12	2020-10-13		37	63	1	58.736		1			2	162	65.5	24.9581	2	9999	9999	1	1	2	2	2	2	2	2	2	2	2	2	1	1	2	1	1	2	1	2								2	2	2
1	5	2020-08-04	2020-08-04		8	73	1	69.656		1			2	174	74	24.4418	2	1	9999	2	2	2	2	1	2	2	1	2	2	2	2	2	2	2	1	2	2	2	2								2	2	2
2	32	2020-08-25	2020-09-01		32	29	1	59.646		1			2	163	93	35.0032	2	1	1	2	2	2	1	1	2	2	2	2	2	2	2	1	2	1	1	2	2	2	2	2015-03-19	55	0	4				1	2	2
1	34	2020-07-30	2020-08-04		65	71	1	66.016		1			2	170	70	24.2215	2	9999	9999	2	1	2	2	2	2	2	2	2	2	2	2	2	2	2	2	2	2	2	2								2	2	2
1	70	2020-07-08	2020-07-12		112	69	2	40.859	2	1			2	147.3	81	37.3319	2	2	9999	9999	9999	2	1	1	2	2	2	2	1	2	2	2	2	2	2	2	2	2	2	2020-06-10	50	0	4				2	2	2
1	17	2020-10-14	2020-10-21		22	60	2	48.776	2	1			2	156	90	36.9822	2	1	2	2	2	2	2	2	2	2	2	2	2	2	2	2	2	2	2	2	2	2	2								2	2	2
1	4	2020-10-13	2020-10-20		29	61	1	75.116		1			2	180	94	29.0123	2	1	9999	9999	9999	2	1	1	2	2	2	2	2	2	2	1	2	2	1	2	1	1	2								2	1	2
1	4	2020-10-22	2020-10-22		12	74	2	47.866	2	1			2	155	77	32.0499	2	1	9999	9999	9999	2	1	1	2	2	2	2	2	2	2	2	2	2	2	2	2	2	9999								2	1	2
1	2		2020-10-12		10	51	1	74.206		1			2	179	105	32.7705	2	2	9999	2	1	1	1	1	2	2	2	2	2	2	2	2	2	2	2	2	2	2	2								1	9999	9999
10	23	2020-03-25	2020-03-27	16.1458	34	59	1	66.016		1			2	170	70	24.2215	2	2	1	2	2	2	2	2	2	2	2	2	2	2	1	2	2	2	2	2	2	2	2								2	2	2
10	25	2020-03-16	2020-03-22	24.3583	27	45	2	56.966	2	1			2	165	100	36.7309	9999	2	1	2	2	2	2	1	2	2	2	2	2	2	2	2	2	2	1	2	2	2	2								2	1	2
10	9	2020-04-20	2020-04-15	8.23264	9	85	2	47.866	2	1			2	155	70	29.1363	2	2	2	2	1	2	1	1	1	2	2	2	2	1	2	2	2	2	2	2	2	2	2								1	2	1
10	5	2020-04-19	2020-04-21	5.08333	5	33	1	56.916		2	1	1	2	160	70	27.3438	9999	9999	9999	2	1	2	2	2	2	2	2	2	2	2	2	2	2	2	2	2	2	2	2								2	2	2
10	29	2020-04-18	2020-04-22	25.375	40	39	1	56.916		2	1	3	2	160	70	27.3438	2	2	2	2	1	2	2	2	2	2	2	2	2	2	2	2	2	2	2	2	2	2	2								2	2	2
10	31	2020-04-26	2020-04-27		31	42	1	66.016		1			2	170	80	27.6817	2	1	2	2	1	2	2	2	2	2	2	2	2	2	2	2	2	2	2	2	2	2	2								2	2	2
10	13	2020-04-23	2020-04-28		14	49	1	64.196		2	1	2	2	168	80	28.3447	2	9999	2	2	1	9999	1	2	2	2	2	2	2	2	2	2	2	2	2	2	2	2	2								2	2	2
10	15	2020-04-25	2020-04-28	8.71875	20	53	1	61.466		2	1	3	2	165	63	23.1405	2	2	9999	2	2	9999	2	2	2	2	2	2	2	2	2	2	2	2	2	2	2	2	2								2	2	2
5	2	2020-06-06	2020-06-06		8		1	55.096		1			2	158	69	27.6398	9999	9999	9999	9999	1	9999	9999	9999	9999	9999	9999	9999	9999	9999	9999	9999	9999	9999	9999	9999	9999	9999	9999								9999	9999	9999
5	8	2020-06-01	2020-06-01		19		2	46.956	2	2	1	3	2	154	65	27.4077	9999	9999	9999	9999	1	9999	1	9999	9999	9999	9999	9999	9999	9999	9999	9999	9999	9999	9999	9999	9999	9999	9999								9999	9999	9999
5	30	2020-06-05	2020-06-05	-0.457639	30		1	56.916		2	1	11	2	160	80	31.25	9999	9999	9999	9999	1	9999	2	1	1	9999	9999	9999	9999	9999	9999	9999	9999	9999	9999	9999	9999	9999	9999								9999	9999	9999
5	4	2020-06-04	2020-06-04		25		1	64.196		1			2	168	63	22.3214	9999	9999	9999	9999	1	2	1	2	2	2	2	2	2	2	2	2	2	2	2	2	2	2	2								2	2	2
5	5	2020-05-31	2020-05-31		9	57	1	56.916		2	1	9	2	160	83	32.4219	9999	9999	9999	9999	1	9999	1	1	9999	9999	9999	9999	9999	9999	9999	9999	9999	9999	9999	9999	9999	9999	9999								9999	9999	9999
10	1	2020-04-26	2020-04-28		9	38	1	64.196		2	1	3	2	168	75	26.5731	2	2	9999	2	2	9999	2	2	2	2	2	2	2	2	2	2	2	2	2	2	2	2	2								2	2	2
5	9	2020-06-10	2020-06-10	3.43611	14		1	45.996		2	2	3	2	148	61	27.8488	9999	9999	9999	9999	1	9999	9999	9999	9999	9999	9999	9999	9999	9999	9999	9999	9999	9999	9999	9999	9999	9999	9999								9999	9999	9999
5	5	2020-06-07	2020-06-07		17		1	56.916		1			2	160	67	26.1719	2	2	2	2	1	2	2	2	2	2	2	2	2	2	2	2	2	2	2	2	2	2	2								2	2	2
5	6	2020-06-09	2020-06-09		7		2	56.966	2	1			2	165	68	24.977	2	2	2	2	1	2	9999	9999	9999	9999	9999	9999	9999	9999	9999	9999	9999	9999	9999	9999	9999	9999	9999								2	2	2
5	5	2020-06-07	2020-06-07	-0.540278	4		2	61.516	2	2	1	11	1	170	85	29.4118	2	2	2	2	1	2	2	2	2	2	2	2	2	2	2	2	2	2	2	2	2	2	2								2	2	2
5	11	2020-06-09	2020-06-09		24		1	64.196		2	1	1	2	168	74	26.2188	2	2	2	2	1	2	2	2	2	2	2	2	2	2	2	2	2	2	2	2	2	2	2								2	2	2
5	20	2020-06-10	2020-06-10	17.5007	24		1	61.466		2	1	2	2	165	78	28.6501	2	2	2	2	2	2	2	2	2	2	2	2	2	2	2	2	2	2	2	2	2	2	2								2	2	2
5	23	2020-06-10	2020-06-10	16.3958	24		1	60.556		2	1	1	1	164	68	25.2826	2	1	2	1	9999	2	2	1	2	2	2	2	2	2	2	2	1	2	2	2	2	2	2								2	2	2
5	1	2020-06-10	2020-06-10		10		1	58.736		2	1	1	2	162	65	24.7676	2	2	2	2	1	2	2	2	2	2	2	2	2	2	2	2	2	2	2	2	2	2	2								2	2	2
5	1	2020-06-11	2020-06-11	-0.397222	1		2	48.776	2	1			2	156	62.8	25.8054	9999	9999	9999	9999	1	2	1	1	2	2	2	2	2	2	2	2	2	2	2	2	2	2	2								2	2	2
5	9	2020-06-11	2020-06-11		13		1	53.276		2	1	3	2	156	84	34.5168	2	2	2	2	1	2	2	2	2	2	2	2	2	2	2	2	2	2	2	2	2	2	2								2	2	2
5	15	2020-06-11	2020-06-11	7.625	15		1	66.016		1			2	170	70	24.2215	2	2	2	2	1	2	1	1	2	2	2	2	2	2	2	2	2	2	2	2	2	2	2								2	2	2
5	12	2020-06-12	2020-06-12	8.41597	12		1	61.466		1			2	165	90	33.0579	2	1	2	2	2	2	1	1	2	2	2	2	2	2	2	2	2	2	2	2	2	2	2								2	2	2
10	5	2020-04-27	2020-04-30		18	58	1	66.016		2	1	11	2	170	70	24.2215	2	2	9999	2	2	2	2	1	1	1	2	2	2	2	2	2	2	2	2	2	2	2	2								1	2	1
5	17	2020-06-13	2020-06-13	11.4167	17		1	63.286		1			2	167	85	30.478	2	2	2	2	1	2	1	2	2	2	2	2	2	2	2	2	2	2	2	2	2	2	2								2	2	2
5	6	2020-06-17	2020-06-14		9		1	61.466		2	1	9	2	165	65	23.8751	2	1	2	2	2	2	2	2	2	2	2	2	2	2	2	2	2	2	2	2	2	2	2								2	2	2
5	3	2020-06-14	2020-06-14		8		2	55.146	2	2	1	9	1	163	105	39.5197	2	1	2	2	1	2	1	2	2	2	2	2	2	2	2	2	2	2	2	2	2	2	2								2	2	2
18	51	2020-06-03	2020-06-09	51.3319	52	27	1	72.386		1			1	177	100	31.9193					1	2	2	2	2	2	1	2	1		2	2	2	2	2	2	2	2	2								2	2	2
18	40	2020-07-12	2020-07-12	29.0417	35	40	2	38.766	1	1			2	145	80	38.0499					1	2	2	2	2	2	2	2	2	2	2	2	2	2	2	2	2	2	2								2	2	2
18	19	2020-05-19	2020-05-25	12.1042	43	65	1	72.386		2		7	2	177	85	27.1314					1	2	1	1	2	2	2	9999	2	2	9999	2	2	2	2	2	2	2	2								9999	9999	2
18	32	2020-07-01	2020-07-07	31.6056	32	38	2	52.416	1	1			2	160	100	39.0625		1				2	2	2	2	2	2	2	2	2	2	2	2	2	2	2	2	2	2								2	2	2
18	22	2020-05-28	2020-05-26	21.8125	22	53	1	55.096		2	1	1	2	158	90	36.0519	9999	9999	9999	9999	1	2	1	2	2	2	2	2	2	2	2	2	2	2	2	2	2	2	2								9999	9999	9999
18	6	2020-09-19	2020-09-21	17.6535	6	20	1	58.736		1			2	162	80	30.4832	9999	9999	9999	9999	1	2	2	2	2	2	2	2	2	2	2	2	2	2	2	2	2	2	2								2	2	2
18	24	2020-06-24	2020-06-25	23.6278	21	51	1	59.646		1			2	163	72	27.0993	2	9999	9999	2	1	2	2	2	2	2	2	2	2	2	2	2	2	2	2	2	2	2	2								2	2	2
18	57	2020-07-29	2020-08-01	51.4153	52	48	1	74.206		2	1	8	2	179	120	37.452	2	2	2	2	2	2	2	2	2	2	2	2	2	2	2	2	2	2	2	2	2	2	2								2	2	2
18	18	2020-08-01	2020-08-07	17.1021	7	45	1	66.016		1			2	170	90	31.1419					1	2	2	2	2	2	2	2	2	2	2	2	2	2	2	2	2	2	2								2	2	2
18	27	2020-10-27	2020-10-23	14.666	25	42		47.816		1			2	150	90	40					1	2	2	2	2	2	2	2	2	2	2	2	2	2	2	2	2	2	2								2	2	2
19	9	2020-04-08	2020-04-12		13	59	1	56.916		1			2	160	90	35.1562	9999	9999	9999	9999	9999	9999	1	1	1	9999	2	2	2	2	2	1	1	2	1	2	2	2	2	2015-09-01	45	0	4				2	2	1
19	2	2020-03-21	2020-03-21		2	15	1	60.556		1			2	164	90	33.4622	9999	9999	9999	1		2	2	2	2	2	2	2	2	2	2	2	2	2	2	2	2	2	1								2	2	2
19	21		2020-05-15	8.72431	21	66	1	56.916		2	1		2	160	70	27.3438	2	1	2	2	2	1	1	2	1	1	2	2	2	2	2	2	2	2	2	2	2	2	2								2	2	2
19	18	2020-05-24	2020-05-24		15	70	1	40.536		1			2	142	60.3	29.9048	2	2	2	2	2	9999	1	1	1	2	2	2	2	2	2	2	2	2	2	2	2	2	2	2020-06-01	38	1	5				2	1	1
19	22	2020-06-02	2020-05-31	18.6861	22	83	2	56.056	2	2	1		2	164	94	34.9494	2	2	2	2	2	2	2	1	2	2	2	2	2	2	2	2	2	2	2	2	2	2	2								2	2	2
19	14	2020-05-20	2020-05-25		24	57	2	52.416	2	1			2	160	98	38.2812	2	1	2	2	2	2	1	1	1	1	1	1	2	2	2	2	2	2	2	2	2	2	2	2020-03-04	35	0					2	2	1
19	9	2020-04-22	2020-04-16		13	67	1	56.916		1			2	160	69	26.9531	9999	2	9999	9999	1	2	2	1	9999	9999	2	2	2	2	9999	9999	9999	9999	9999	9999	9999	9999	9999								2	9999	2
19	3	2020-04-22	2020-04-21	2.36111	3	48	2	43.316	2	2	1		2	150	98	43.5556	9999	9999	9999	9999	1	2	2	1	9999	9999	1	9999	9999	9999	9999	9999	9999	9999	9999	9999	9999	9999	9999								9999	9999	9999
19	16	2020-04-09	2020-04-06		74	33	2	52.416		1			2	160	62	24.2188	9999	9999	9999	9999	1	2	2	1	9999	9999	9999	2	9999	9999	9999	9999	9999	9999	9999	9999	9999	9999	9999								2	2	9999
19	1	2020-04-22	2020-04-28		11	61	1	64.196		1			2	168	70	24.8016	9999	9999	9999	9999	1	2	1	1	2	9999	2	2	2	2	9999	9999	9999	9999	9999	9999	9999	9999	9999								9999	9999	9999
19	82	2020-05-20	2020-05-23		24	61	1	66.016		2	1	14	2	170	80	27.6817	9999	9999	9999	2	9999	2	1	1	2	2	2	2	2	2	2	2	2	2	2	2	2	2	2								9999	9999	9999
19	38	2020-05-23	2020-05-26	34.3479	11	67	1	58.736		1			2	162	93	35.4367	9999	9999	9999	9999	9999	9999	1	1	1	1	2	2	2	2	2	1	2	2	2	2	2	2	2								2	2	1
19	1	2020-04-15	2020-04-18		2	62	2	45.136	2	1			2	152	68	29.4321	9999	9999	9999	2	9999	2	2	1	9999	1	2	9999	2	2	2	2	2	2	1	1	2	1	2								2	2	2
19	1	2020-06-06	2020-06-06		22	24	1	55.096		2	1		2	158	48	19.2277	9999	9999	9999	9999	1	9999	2	2	2	2	2	2	2	2	2	2	2	2	2	2	2	2	2	2020-06-06	40	1					9999	9999	9999
19	11	2020-05-23	2020-05-26	6.38958	15	72	1	60.556		1			2	164	70	26.0262	9999	9999	9999	9999	9999	2	1	1	1	1	2	2	2	2	2	2	2	2	2	2	2	2	2								1	2	1
19	14	2020-05-20	2020-05-29	4.38333	29	58	2	43.316	2	1			2	150	65	28.8889	9999	1	9999	9999	2	2	1	9999	9999	9999	9999	9999	9999	9999	9999	9999	9999	9999	9999	9999	9999	9999	9999								2	2	9999
19	74	2020-05-15	2020-05-14	72.5	74	62	2	41.496	2	2	1		2	148	55	25.1096	2	9999	9999	9999	9999	2	2	2	2	2	2	2	2	2	2	2	2	2	2	2	2	2	2								2	2	2
19	7	2020-06-15	2020-06-22	2.54167	7	61	1	65.106		1			2	169	89.5	31.3364	2	1	2	2	2	2	1	1	2	2	2	2	2	2	2	2	2	1	1	2	2	2	2								2	2	2
19	3	2020-06-10	2020-06-17		10	41	1	65.106		1			2	169	86	30.111	2	9999	9999	2	1	9999	1	2	2	2	2	2	2	2	2	2	2	2	2	2	2	2	2								2	2	2
19	21	2020-07-23	2020-07-23	18.7083	22	17	2	47.866	2	2	1	12	2	155	80	33.2986	2	2	2	2	1	2	2	2	2	2	2	2	2	2	2	2	2	2	2	2	2	2	2								2	2	1
19	8	2020-08-22	2020-08-29	44080	8	38	2	56.966	2	2	1	1	2	165	90	33.0579	2	1	2	2	2	2	1	2	2	2	2	2	2	2	2	2	2	2	2	2	2	2	2								2	2	2
19	35	2020-08-03	2020-08-03	26.0833	35	63	1	61.466		1			2	165	85	31.2213	2	1	2	2	2	2	1	1	1	2	2	2	2	2	2	2	2	2	2	2	2	2	2								2	1	1
19	4	2020-05-29	2020-06-06	12	4	38	1	79.666		2	1	9	2	185	125	36.523	2	2	2	2	1	2	2	2	2	2	2	2	2	2	2	2	2	2	2	2	2	2	2								2	2	2
19	21		2020-07-19	16	11	44	1	56.916		2	1	1	2	160	80	31.25	2	1	2	2	2	2	2	2	2	2	2	2	2	2	2	2	2	2	2	2	2	2	2								2	2	2
19	41	2020-06-28	2020-07-02	45	41	48	1	90.586		2	1	9	2	197	88	22.6752	2	2	2	2	1	2	2	2	2	2	2	2	2	2	2	2	2	2	2	2	2	2	2								2	2	2
19	9		2020-08-18	19	9	32	1	66.016		1			2	170	100	34.6021	2	1	2	2	2	2	1	2	2	2	2	2	2	2	2	2	2	2	2	2	2	2	2								2	2	2
19	21	2020-07-21	2020-07-23	22	21	53	1	67.836		1			2	172	95.1	32.1458	2	1	2	2	2	9999	1	1	2	2	2	2	2	2	2	2	2	2	2	2	2	2	2								9999	9999	2
19	13	2020-07-01	2020-07-17	16	14	36	1	70.566		2	1	1	2	175	76	24.8163	2	1	2	2	2	9999	2	2	2	2	2	2	2	2	2	2	2	2	2	2	2	2	2								2	2	2
19	6	2020-06-11	2020-06-18	5.54931	13	77	2		2	2		14	2				9999	9999	9999	9999	1	2	1	1	1	2	2	2	2	2	2	2	2	2	2	2	2	2	2		45	0					9999	9999	9999
19	27		2020-06-19	35.8104	27	35	2	47.866	1	2	1	14	2	155	78	32.4662	2	2	2	2	1	2	2	2	2	2	2	2	1	2	2	2	2	2	2	2	2	2	2								2	2	2
19	9	2020-06-15	2020-06-19	1.71597	13	80	1	61.466		1			2	165	67	24.6	2	1	2	2	2	2	2	2	2	2	2	2	2	2	2	2	2	2	2	2	2	2	2								2	2	2
19	1	2020-06-06	2020-06-06	0	22	24	1	55.096		2	1		2	158	48	19.2277				1		9999	2	2	2	2	2	2	2	2	2	2	2	2	2	2	2	2	2								2	2	2
19	1	2020-06-19	2020-06-20	0	33	54	1	66.016		1			2	170	105	36.3322	2	2	2	1	2	9999	1	1	2	2	2	2	2	2	2	2	2	2	2	2	2	2	2								1	2	2
19	9		2020-06-22	4.49861	9	61	1	65.106		1			1	169	89	31.1614	9999	9999	9999	9999	1	2	1	1	2	2	2	2	2	2	2	2	2	1	1	2	2	2	2								2	2	2
19	45	2020-06-02	2020-06-06	39.5417	50	79	2	43.316	2	1			2	150	90	40		1				9999	1	1	1	2	2	2	2	2	2	2	2	2	2	2	2	2	2								1	9999	9999
19	4	2020-06-06	2020-06-06	3.54167	4	38	1	79.666		2	1	9	2	185	125	36.523					1	9999	2	2	2	2	2	2	2	2	2	2	2	2	2	2	2	2	2								2	2	2
19	8	2020-06-07	2020-06-12	0	14	27	2	59.696	1	2	1	12	2	168	79	27.9904					1	2	2	2	2	2	2	2	2	2	2	2	2	2	2	2	2	2	2								2	2	2
19	18	2020-05-03	2020-05-08	2.29167	18	46	1	61.466		1				165	65	23.8751				1		9999	1	1	1	9999	9999	2	2	2	2	2	2	2	2	2	2	2	1		55						9999	9999	1
19	5	2020-06-27	2020-06-27	0	9	67	1	61.466		2	1			165	80	29.3848	9999	9999	9999	9999	1	9999	1	1	1	1	9999	2	2	2	2	1	2	2	2	2	2	2	2								2	2	1
19	12	2020-05-01	2020-05-21	0	43	78	1	55.096		1			2	158	65	26.0375	9999	9999	9999	9999	1		1												1			1		2020-10-23							2
19	25	2020-07-12	2020-07-20	21.2778	28	79	1	60.556		1			2	164	84	31.2314	2	9999	9999	9999	9999	2	1	1	1	2	2	2	2	2	2	1	2	2	2	2	2	2	2	2018-06-13	45	0	4				2	2	1
19	22	2020-06-04	2020-06-10	17.8333	22	55	1	56.916		2	1	14	2	160	60	23.4375		1				1	1	1	1	2	2	2	2	2	2	2	2	2	2	2	2	2	2								9999	9999	9999
19	4	2020-06-14	2020-06-14	-0.75	4	83	1	61.466		1			2	165	80	29.3848				1		9999	2	1	1	2	2	2	2	2	2	2	2	2	2	2	2	2	2								1	9999	1
19	9	2020-05-23	2020-05-23		9	29	1	61.466						165	60	22.0386					1	2	2	2	2	2	2	2	2	2	2	2	2	2	2	2	2	2	2
19	11	2020-05-20	2020-05-22		15	61	1	55.096		1				158	117	46.8675					1	2	1	1				1				1
19	31	2020-05-18	2020-05-21		49	57	1	61.466		1				165	70	25.7117					1		2																	2020-05-11	25	0
19	3	2020-06-15	2020-06-15		23	48	2	52.416	2	2	1	8	2	160	75	29.2969					1	9999	1	1	1	2	2	2	2	2	2	2	1	2	2	2	2	2	2								9999	2	1
19	13	2020-07-13	2020-07-20		17	68	2	36.946	2	1			2	143	87	42.5449	9999	9999	9999	9999	9999	2	1	1	1	2	2	1	2	2	2	1	2	2	2	2	2	2	2	2020-03-18	55	0	4				2	2	1
19	15	2020-06-11	2020-06-11	5	15	79	2	48.776	2	1			2	156	82	33.6949					1	9999	1	1	1	2	2	2	2	2	2	1	2	2	2	2	2	2	2	2019-12-01	45						2	2	1
19	8	2020-07-11	2020-07-12		9	76	1	65.106		1				169	90	31.5115					1		1		1							1
19	3	2020-06-15	2020-06-15		4	83	1	61.466		1			2	165	82	30.1194	2	9999	9999	2	1	9999	1	1		1
19	18	2020-05-24	2020-05-27		21	70	1	49.636		1				152	66	28.5665					1		1	1
19	10	2020-07-20	2020-07-20	8.31389	10	72	1	61.466		1			2	165	125	45.9137	2	1	2	9999		2	1	1	1	1	1	2	2	2	2	1	2	2	2	2	2	2	2	2019-05-15	25	0	4				1	2	2
19	10	2020-06-15	2020-06-10	1	22	52	1	62.376		1			2	166	77	27.9431				1		9999	1	1	1	2	2	2	2	2	2	2	2	2	2	2	2	2	2								1	2	1
19	42	2020-06-27	2020-06-20	37.5833	43	65	2	56.966		1			2	165	95	34.8944					1	9999	2	1	1	2	2	2	2	2	2	1	2	2	2	2	2	2	2	2020-01-01	55	0					9999	9999	9999
19	7	2020-06-24	2020-06-26	6	17	59	2		2	1					58						1		1		1							1	1								50	0	3			20	1		1
19	1	2020-06-09	2020-07-31	37	43	65	2	47.866	2	1				155	80	33.2986					1			1	1							1								2020-01-23	45	0	3			35
19	10	2020-07-21	2020-07-20	9	10	72	1	71.476		1				176	170	54.8812					1		1	1		1						1
19	14	2020-07-22	2020-07-21		21	72	1	61.466		1			2	165	60	22.0386	2	2	2	2	1	9999	1	1	1	1	2	2	2	2	2	1	2	2	2	2	2	2	2		50	0	4				2	2	1
19	5		2020-07-16		16	63	1	63.286		1			2	167	85	30.478					1	2	1	1	1	9999	2	2	2	2	2	9999	2	2	2	2	2	2	2								2	2	1
19	15	2020-07-21	2020-07-21		21	72	1	70.566		1			2	175	73	23.8367	2	2	2	2	1	1	1	1		1						1
19	7	2020-07-23	2020-07-28		18	63	2	61.516	2	1			2	170	80	27.6817					1		1	1
19	11	2020-07-21	2020-07-23		16	49	1	75.116		1				180	70	21.6049					1		1	1														1											1
19	6		2020-07-02	6	6	77	1	75.116		1				180	81	25					1	9999	2	1	2	2	2	2	2	2	2	2	2	2	2	2	2	2	2		50						9999	9999	9999
19	4	2020-09-13	2020-09-12		4	29	2	56.966	2	1			2	165	59	21.6713	2	2	2	2	1	2	2	2	2	2	2	2	2	2	2	2	2	2	2	2	2	2	2								2	2	2
20	9	2020-10-05	2020-10-08		12	54	2	52.416	2	1			2	160	63	24.6094	2	1	2	2	2	2	2	2	2	2	2	2	2	2	2	2	2	2	1	2	2	1	2								2	2	2
19	39	2020-06-28	2020-07-02		39	48	1	90.586		2	1			197	88	22.6752	2	9999	9999	2	1																										2	2	2
19	8		2020-07-12	7.5	9	76	1	66.926		2			2	171	70	23.939	2	9999	9999	9999	2	2	1	1	1	1	2	2	2	2	2	1	2	2	2	2	2	2	2	2019-12-02	20	1					2	2	1
19	3	2020-07-10	2020-07-16		10	53	1	54.186		1			2	157	81	32.8614	2	9999		2	9999	9999	1	1	9999	2	2	2	2	2	2	2	2	2	2	2	2	2	2								2	2	2
19	7	2020-07-26	2020-07-26		7	51	1	61.466		2	1	3	2	165	65	23.8751	2	2	2	1	2	2	2	1	2	2	2	2	2	2	2	2	2	2	2	2	2	2	2								2	2	2
19	10	2020-07-09	2020-07-13		18	63	2	47.866	2	1			2	155	80	33.2986	2	9999	9999	2	1	2	9999	9999	9999	9999	2	2	2	2	2	2	2	2	1	2	2	1	2								2	2	2
19	1	2020-07-09	2020-07-17	0.5	4	54	2	48.776	2	1			2	156	95	39.0368	2	1	2	2	2	2	1	1	1	2	2	2	2	2	2	2	2	2	2	2	2	2	2		50	0					1	2	1
15	3	2020-03-24	2020-03-24	3.5	3	80	1	66.016		2	1	14	2	170	80	27.6817	2	1	1	2	1	1	1	1	1	2	1	1	2	2	2	2	2	2	2	2	2	2	2								2	2	2
15	1	2020-03-27	2020-03-26	-0.5	1	58	1	68.746		1			2	173	87	29.0688	2	1	2	2	2	2	1	1	2	2	2	2	2	2	2	2	2	2	2	2	2	2	2								9999	9999	9999
15	2	2020-03-30	2020-04-01	2.5	4	50	2	52.416	2	2	1	9	2	160	67	26.1719	2	1	2	2	2	2	1	1	2	2	2	2	2	2	2	2	2	2	2	2	2	2	2								1	2	2
15	1	2020-04-03	2020-04-03	0.5	1	40	2	56.966	2	2	1	14	2	165	56	20.5693	2	1	2	2	2	2	1	1	2	2	2	2	1	2	2	2	2	2	2	2	2	2	2								2	2	2
15	4	2020-04-03	2020-04-04		4	33	1	66.016		2	1	3	2	170	88	30.4498	2	1	2	2	2	2	2	2	2	2	2	2	2	2	2	2	2	2	2	2	2	2	2								2	2	2
15	4	2020-04-01	2020-04-01	3.5	4	46	2	52.416	2	2	1	2	2	160	70	27.3438	2	2	2	2	1	2	2	2	2	2	2	2	1	2	2	2	2	2	2	2	2	2	2								2	2	2
15	1	2020-04-04	2020-04-04	0.5	1	61	1	68.746		1			2	173	86	28.7347	2	1	2	2	2	1	1	1	1	2	1	2	2	2	2	2	2	2	2	2	2	2	2								1	2	1
15	1	2020-04-09	2020-04-09	-0.5	1	64	2	54.236	2	1			2	162	58	22.1003	1	1	1	2	2	2	1	1	2	2	2	2	2	2	2	2	2	2	2	2	2	2	2								1	2	2
15	3	2020-04-10	2020-04-13		7	57	1	73.296		1			2	178	90	28.4055	2	1	1	2	2	1	1	1	1	2	2	2	2	2	2	2	2	2	2	2	2	2	2								1	2	1
15	10	2020-04-17	2020-04-17		10	48	1	75.116		1			2	180	88	27.1605	2	1	2	2	2	1	1	1	2	2	2	2	2	2	2	2	2	2	2	2	2	2	2								2	2	2
15	10	2020-05-02	2020-05-02	10	10	62	1	69.656		2	1	9	2	174	89	29.3962	2	1	2	2	2	2	1	2	2	2	2	2	2	2	2	2	2	2	2	2	2	2	2								2	2	2
12	68	2020-04-25	2020-04-24		42	54	1	75.116		1			1	180	90	27.7778	2	1	1	2	1	1	1	1	1	1	1	2	2	2	2	2	2	2	2	2	2	2	2								2	1	1
12	8	2020-05-19	2020-05-19	7.24236	8	51	1	66.016		2	1	16	2	170	90	31.1419	2	2	2	1	1	1	1	2	2	2	2	2	2	2	2	2	2	2	2	2	2	2	2								2	2	2
12	4	2020-05-15	2020-05-16	3.20556	11	61	1	67.836		2	1	17	2	172	80	27.0416	2	1	2	2	1	1	1	2	2	2	2	1	2	2	2	2	2	2	2	2	2	2	2								2	2	1
12	7		2020-05-10		32	16	2	34.216	2	1			2	140	50	25.5102	2	2	2	2	2	2	2	2	2	2	2	2	2	2	2	2	2	2	2	2	2	2	2								2	2	2
12	13	2020-05-09	2020-05-11	2.39792	35	17	2	25.116	2	1			2	130	50	29.5858	2	2	2	2	1	2	2	2	2	2	2	1	2	2	2	1	2	2	2	2	2	2	2								2	2	2
12	8	2020-05-06	2020-05-06	4.16597	9	83	1	63.286		1			2	167	76	27.2509	2	9999	9999	1	1	2	1	1	1	9999	9999	2	1	9999	2	2	2	2	2	2	2	2	2								9999	9999	9999
12	24	2020-05-12	2020-05-16	20.0715	28	23	2	52.416	2	2	1	12	2	160	70	27.3438	2	1	9999	9999	1	2	2	1	2	2	2	2	1	2	2	2	2	2	2	2	2	2	2								2	2	2
12	36	2020-04-22	2020-04-21	34.3917	38	59	2	46.046	2	1			2	153	90	38.4468	2	2	9999	9999	1	2	1	2	2	2	2	2	2	2	2	2	2	2	2	2	2	2	2								9999	9999	9999
12	16	2020-05-15	2020-05-21	11.1743	67	75	1	66.016		2	1	5	2	170	76	26.2976	2	9999	9999	2	2	2	1	1	1	2	2	2	2	2	2	1	2	2	2	2	2	2	2								9999	9999	9999
12	12	2020-04-23	2020-04-29	8.39306	30	54	1	61.466		2	1	3	2	165	70	25.7117	2	9999	9999	9999	9999	1	2	2	1	2	2	2	2	2	2	2	2	2	2	2	2	2	2								9999	9999	9999
12	8	2020-05-04	2020-05-03		15	33	1	73.296		2	1	3	2	178	67	21.1463	2	1	2	1	1	1	2	2	2	9999	9999	9999	2	2	2	2	2	2	2	2	2	2	2								2	2	2
12	18	2020-05-02	2020-05-02		26	55	1	75.116		2	1	2	2	180	65	20.0617	2	2	2	2	9999	2	1	2	2	2	2	1	2	2	2	2	2	2	2	2	2	2	2								2	2	2
12	8	2020-05-03	2020-05-03		8	77	1	84.216		1			2	190	80	22.1607	2	2	2	2	1	2	1	2	2	2	1	1	2	2	2	1	2	2	2	2	2	2	2								2	2	2
12	24	2020-05-10	2020-05-11		10	48	2	56.966	2	1			2	165	67	24.6097	2	2	2	2	2	2	1	2	2	2	2	2	2	2	2	2	2	2	2	2	2	2	2								9999	9999	9999
12	15		2020-05-18		15	30	1	75.116		1			2	180	80	24.6914	2	2	2	2	2	1	1	2	2	2	2	2	2	2	2	2	2	2	2	2	2	2	2								2	2	2
12	8	2020-06-01	2020-06-02		36	80	1	75.116		1			2	180	90	27.7778	2	2	2	9999	1	9999	1	9999	1	9999	1	9999	1	2	2	2	2	2	2	2	2	2	2								9999	9999	1
12	2		2020-06-08	1.45139	2	40	1	80.576		2	1	12	2	186	85	24.5693	2	2	2	1	1	1	1	2	2	2	2	1	1	2	2	2	2	2	2	2	2	2	2								9999	9999	9999
12	10	2020-05-24	2020-05-26		16	48	1	84.216		2	1	2	1	190	82	22.7147	2	1	2	2	9999	2	2	2	2	2	2	2	2	2	2	2	2	2	2	2	2	2	2								2	2	2
12	6	2020-06-28	2020-06-28		12	41	1	66.016		2	1	9	1	170	80	27.6817	2	2	2	2	1	1	2	2	2	2	2	2	2	2	2	2	2	2	2	2	2	2	2								2	2	2
12	43	2020-05-28	2020-05-28		56	52	1	61.466		2	1	2	1	165	82	30.1194	2	2	2	1	1	2	1	1	2	2	1	2	2	2	2	2	2	2	1	2	2	2	2								1	2	1
12	1	2020-06-17	2020-06-20	2.23264	3	69	1	61.466		1			2	165	65	23.8751	2	2	1	2	1	2	1	1	1	1	1	2	2	2	2	2	2	2	2	2	2	2	2								1	2	1
12	3		2020-05-01		9	33	1	80.576		2	1	9	2	186	82	23.7022	2	2	2	2	2	1	2	2	2	2	2	2	2	2	2	2	2	2	2	2	2	2	2								2	2	2
12	34		2020-06-15		12	55	1	70.566		1			2	175	75	24.4898	2	1	9999	9999	9999	1	1	9999	9999	2	2	2	2	2	2	2	2	2	2	2	2	2	2								2	2	2
12	2	2020-05-20	2020-05-20		4	48	1	73.296		1			2	178	75	23.6713	2	1	2	2	2	1	1	1	2	2	2	2	2	2	2	2	2	2	2	2	2	2	2								9999	1	1
12	16	2020-10-15	2020-10-15		16	56	2	52.416	2	1			2	160	74	28.9062	2	2	2	1	1	2	1	1	1	2	2	2	2	2	2	2	2	2	2	2	2	2	2								1	9999	1
12	5	2020-10-22	2020-10-23	3.59236	13	32	2	68.796	2	2	1	11	2	178	70	22.0932	2	2	2	2	1	2	2	2	2	2	2	2	2	2	2	2	2	2	2	2	2	2	2								2	2	2
12	6	2020-10-06	2020-10-24		26	21	2	34.216	2	1			2	140	57	29.0816	2	1	2	2	1	2	2	2	2	2	2	2	2	2	2	1	1	1	1	2	2	2	2								2	2	2
12	7	2020-10-19	2020-10-21	5.54028	14	82	1	79.666		1			2	185	70	20.4529	2	2	2	2	1	1	1	2	2	1	2	2	2	2	2	2	2	2	2	2	2	2	2								2	2	1
12	11	2020-10-10	2020-10-20	10.459	20	74	1	69.656		1			2	174	62	20.4783	2	2	2	2	1	2	1	1	2	2	2	2	2	2	2	2	2	2	2	2	2	2	2								1	9999	1
12	12	2020-10-12	2020-10-13		20	68	2	58.786	2	1			2	167	90	32.2708	2	2	2	2	1	2	1	1	2	2	2	2	2	2	2	1	1	2	2	2	2	2	2								2	1	1
12	8	2020-10-15	2020-10-16		17	26	2	66.976	2	1			2	176	80	25.8264	2	1	2	2	1	2	2	2	2	2	2	2	2	2	2	2	2	2	2	2	2	2	2								2	2	2
12	9	2020-10-12	2020-10-17		18	76	1	65.106		1			2	169	67	23.4586	2	2	2	2	1	2	1	1	2	2	2	2	2	2	2	2	2	2	2	2	2	2	2								9999	9999	1
12	5	2020-07-08	2020-07-10		16	55	1	88.766		1			2	195	78	20.5128	2	2	2	2	1	1	1	2	2	2	2	1	2	2	2	2	2	2	2	2	2	2	2								1	2	1
12	6	2020-07-20	2020-07-23	5.06111	8	64	1	73.296		2	1	23	2	178	84	26.5118	2	2	2	2	1	1	1	1	2	2	2	2	1	2	2	1	1	2	2	2	2	2	2								1	1	1
12	5	2020-08-01	2020-08-03	3.02986	6	74	1	79.666		1			2	185	95	27.7575	2	2	2	1	1	2	1	1	1	2	2	2	2	2	2	1	1	2	2	2	2	2	2								2	1	1
12	7	2020-08-12	2020-08-14		106	77	2	58.786	2	2	1	2	2	167	76	27.2509	2	1	2	2	1	2	1	2	2	2	2	2	1	1	2	1	2	2	2	2	2	2	2								2	2	1
12	7	2020-08-05	2020-08-05		15	59	1	70.566		2	1	16	2	175	76	24.8163	2	2	2	2	1	2	1	2	2	2	1	1	2	2	2	2	2	2	2	2	2	2	2								2	2	1
26	18	2020-05-31	2020-05-28	17.2035	18	48	1	57.826		2	1	1	2	161	85	32.7919	9999	9999	9999	2	9999	2	2	2	2	2	2	2	2	2	2	2	2	2	2	2	2	2	2								2	2	2
26	8	2020-05-28	2020-05-27	7.32986	8	51	1	57.826		2	1		2	161	63	24.3046	2	9999	9999	9999	9999	2	2	1	2	9999	9999	9999	9999	9999	9999	9999	9999	9999	9999	2	2	2	2								9999	9999	2
26	11	2020-05-28	2020-05-30	14.2917	22		1	61.466		2	2	5	2	165	85	31.2213	2	1	2	1	2	2	2	2	2	2	2	2	2	2	2	2	2	2	2	2	2	2	2								2	2	2
26	18	2020-05-26	2020-05-27	18.8681	20	46	1	61.466		2	1	3	2	165	65	23.8751	2	1	2	2	2	2	2	2	2	2	2	2	2	2	2	2	2	2	2	2	2	2	2								2	2	2
26	11	2020-05-27	2020-05-27	43958	11	66	1	63.286		2	1	11	2	167	65	23.3067	2	2	2	2	2	2	2	1	2	9999	9999	2	2	2	2	2	2	2	2	2	2	2	2								2	1	1
26	20	2020-05-26	2020-05-27	20.9167	20	43	1	64.196		2	2		2	168	90	31.8878	9999	9999	9999	9999	1	9999	9999	9999	9999	9999	9999	9999	9999	9999	9999	9999	9999	9999	9999	9999	9999	9999	9999								9999	9999	9999
26	3	2020-05-27	2020-05-30	2.38264	6	50	1	67.836		1			2	172	95	32.112	9999	9999	9999	9999	9999	2	1	1	2	2	2	2	2	2	2	2	2	2	2	2	2	2	2								2	2	2
26	10	2020-05-28	2020-05-30		14	82	1	56.916		1			2	160	70	27.3438	2	2	2	2	2	9999	1	1	1	2	2	2	2	2	2	2	2	2	2	2	2	2	2								9999	9999	1
26	6	2020-05-22	2020-06-02	3.94375	24	46	1	64.196		1			1	168	99.5	35.2537	2	1	2	2	2	2	2	2	2	2	2	2	2	2	2	2	2	2	2	2	2	2	2								9999	9999	1
26	10	2020-05-31	2020-06-03	9.29167	14	68	1	64.196		1			2	168	82	29.0533	9999	9999	9999	9999	1	2	1	1	1	2	2	2	2	2	2	2	2	2	2	2	2	2	2								1	2	1
26	3	2020-06-24	2020-06-24		10	69	2	55.146	2	1			2	163	80	30.1103	2	2	2	2	1	2	1	1	2	2	2	2	2	2	2	2	2	2	2	2	2	2	2								2	1	1
26	1	2020-06-25	2020-06-25		5	38	1	64.196		1			1	168	88	31.1791	2	1	2	2	2	2	2	2	2	2	2	2	2	2	2	2	2	2	2	2	2	2	2	2020-01-30	60	0	4				2	2	2
26	4	2020-06-29	2020-06-29		6	71	1	52.366		1			2	155	80	33.2986	2	2	2	2	1	1	1	1	2	2	2	2	2	2	2	2	2	2	2	2	2	2	2								2	1	1
26	1	2020-06-29	2020-06-29		5	31	1	65.106		1			2	169	106	37.1135	2	1	2	1	2	2	1	1	2	2	1	2	1	2	2	2	2	2	2	2	2	2	2								2	2	2
26	3	2020-06-28	2020-07-01		5	49	1	47.816		2	1	9	2	150	75	33.3333	2	1	2	2	2	2	1	1	1	2	2	2	2	2	2	2	2	2	2	2	2	2	2								2	2	2
26	4	2020-06-27	2020-07-06		17	47	1	66.016		2	1	25	2	170	100	34.6021	2	2	2	2	2	2	2	2	2	2	2	2	2	2	2	2	2	2	2	2	2	2	2								2	2	2
26	20	2020-06-13	2020-06-14	13.1632	30	38	1	69.656		2	1	1	2	174	90	29.7265	2	9999	2	2	1	2	2	2	2	2	2	2	2	2	2	2	2	2	2	2	2	2	2								2	2	2
26	7	2020-05-11	2020-06-14	4.33333	7	49	2	52.416	1	1			2	160	117	45.7031					1	2	1	1	2	2	2	2	2	2	2	2	2	2	2	2	2	2	2								2	2	2
26	13	2020-10-14	2020-06-14	12.7083	13		1	60.556		2	1	1	2	164	70	26.0262					1	2	2	2	2	2	2	2	2	2	2	2	2	2	2	2	2	2	2								2	2	2
26	7	2020-06-15	2020-06-16	6.70833	8	76	1			1			2		89		2	1	2	2	1	2	1	2	2	2	2	2	2	2	2	2	2	2	2	2	2	2	2								2	2	2
26	16	2020-06-08	2020-06-09	14.5417	16	56	2	43.316		2	1	1	2	150	61	27.1111					1	2	2	1	2	2	2	2	2	2	2	2	2	2	2	2	2	2	2								2	2	2
26	1	2020-07-15	2020-07-15		7		1	66.016		1			2	170	92	31.8339	2	2	2	2	1		1																								2	2	2
26	9	2020-06-06	2020-06-06		19	50	1			2			2				2	2	2	2	1	2	2	2	2	2	2	2											2								2	2	2
26	11	2020-06-05	2020-06-10		14	45	1	71.476		1			2	176	145	46.8104					9999	9999	2	2	2	2	2	2	1	2	2	2	2	2	2	2	2	2	9999								9999	9999	9999
26	2		2020-06-16	1.52083	2	30	1	56.916		2		1	2	160	80	31.25					9999	2	2	2	2	2	2	2	2	2	2	2	2	2	2	2	2	2	9999								2	2	2
26	27	2020-06-16	2020-06-15	10.4306	27	59	1	63.286		2		24	2	167	85	30.478					9999	2	2	2	2	2	2	2	2	2	2	2	2	2	2	2	2	2	2								2	2	2
26	14	2020-06-16	2020-06-16	10.3264	14	57	1	61.466		2		20	2	165	70	25.7117	9999	9999	9999	9999	1	9999	1	9999	9999	9999	9999	9999	9999	9999	9999	9999	9999	9999	9999	9999	9999	9999	9999								2	2	2
26	17	2020-06-17	2020-06-17	8.33333	17	61	2	52.416	2	2		1	2	160	70	27.3438	9999	9999	9999	9999	9999	2	1	2	2	2	2	2	2	2	2	2	2	2	2	2	2	2	2								2	2	2
26	2	2020-07-01	2020-07-01		4	50	1	66.016		2		6	2	170	105	36.3322	9999	9999	9999	9999	9999	1	2	1	2	2	2	2	2	2	2	2	2	2	2	2	2	2	2								2	2	2
26	5	2020-06-30	2020-07-01		15	70	1	67.836		2		2	2	172	78	26.3656	9999	9999	9999	9999	1	1	1	1	1	2	2	2	2	2	2	2	2	2	2	2	2	2	2								9999	9999	9999
26	5	2020-07-02	2020-07-02		32	57	1	59.646		2		7	2	163	67	25.2174	9999	1	1	9999	9999	2	2	2	2	2	2	2	1	2	2	2	2	2	2	2	2	2	2								9999	9999	9999
26	1	2020-07-02	2020-07-05	1.53125	4	67	1	68.746		2		10	2	173	104	34.7489					1	2	1	1	1	2	1	2	2	2	2	1	2	2	2	9999	2	9999	2	2020-07-06	55	0					2	2	2
26	10	2020-07-02	2020-07-03	0	16	61	1	62.376		2	2	19	1	166	85	30.8463		1				1	2	2	2	2	2	2	2	2	2	2	2	2	2	2	2	2	1								9999		9999
26	3	2020-07-07	2020-07-11	0	100	66	2	52.416	2	1			2	160	151	58.9844	2	2	2	2	1	2	1	1	2	2	2	2	2	2	2	2	2	2	2	2	2	2	2								2	2	2
26	4	2020-07-07	2020-07-12	0	9	76	1	55.096		1			2	158	52	20.83		1	1			2	2	1	2	2	2	2	2	1	2	2	1	1	1	2	9999	9999	2								2	2	2
26	7	2020-07-16	2020-07-20	2.48403	24	44	1	64.196		2	2	13	2	168	75	26.5731	2	1	2	2	2	2	2	2	2	2	2	2	9999	9999	9999	9999	9999	9999	9999	2	9999	9999	2								2	2	2
26	19	2020-07-03	2020-07-03		116	48	1	64.196		1			2	168	108	38.2653		1	1			9999	1	1	9999	9999	2	2	2	2	2	2	2	2	2	2	2	2	2								2	2	2
26	4	2020-08-09	2020-08-15		46	64	2	47.866	2	1			2	155	105	43.7045	2	9999	9999	2	1	2	1	1	1	1	2	2	1	2	2	2	2	2	9999	9999	2	9999	1								9999	1	1
26	4	2020-07-13	2020-07-15		10	55	1	68.746		2	2	11	2	173	111	37.0878	2	1	2	2	1	2	1	2	2	2	2	2	2	2	2	2	2	2	2	2	2	2	2								2	2	2
26	1	2020-07-07	2020-07-13		15	29	2	60.606	2	1			2	169	82	28.7105	2	9999	9999	2	1	2	2	2	2	2	2	2	2	2	2	2	2	2	2	2	2	2	9999								2	2	2
26	11	2020-07-08	2020-07-14		30	57	2	48.776	2	1			2	156	98	40.2696	2	9999	9999	2	1	2	1	1	1	2	2	2	1	2	2	2	2	2	2	2	2	2	2								2	2	1
26	8	2020-08-14	2020-08-13	35.7049	8	89	1	52.366		1			2	155	68	28.3039	2	9999	9999	2	1	2	1	1	1	2	2	2	2	2	2	2	2	2	2	2	2	2	2								2	2	1
26	1	2020-08-16	2020-08-21		39	48	1	66.016		1			2	170	96	33.218	2	9999	9999	2	1	2	2	2	2	2	2	2	2	2	2	2	2	2	2	2	2	2	2								2	2	2
26	25	2020-08-10	2020-08-18	23.4167	25	81	2	58.786	2	1			2	167	74	26.5338	2	9999	9999	2	1	2	2	2	2	2	2	2	2	2	2	2	2	2	2	2	2	2	2								2	2	2
26	4	2020-06-09	2020-06-10		8	51	1	66.016		2	1	7	2	170	86	29.7578					1	9999	2	2	2	2	2	2	2	2	2	2	2	2	2	2	2	2	2								9999	9999	9999
26	4	2020-06-01	2020-05-30	3.60278	4	54	1	66.016		2	1	24	2	170	75	25.9516					1	2	1	1	2	2	2	2	2	2	2	2	2	2	2	2	2	2	2								9999	9999	9999
26	1	2020-07-14	2020-07-14		9	64	1	66.016		1			2	170	95	32.872		1	1	1		2	1	1																							2	2	2
26	2	2020-06-15	2020-06-16		23	54	1	63.286		1			2	167	70	25.0995	2	2	2	2	1	2	1	1	2	2	2	2	2	2	2	2	2	2	2	2	2	2	2								2	2	2
26	3	2020-06-15	2020-06-15		9	60	1	61.466		2	1		2	165	59	21.6713	2	2	2	2	1	2	2	2	2	2	2	2	2	2	2	2	2	2	2	2	2	2	2								2	2	2
26	6	2020-07-14	2020-07-23		15	70	1	64.196		1			2	168	90	31.8878	2	9999	9999	2	1	2	1	2	2	2	2	2	2	2	2	2	2	2	2	2	2	2	2								2	2	2
26	33	2020-07-16	2020-07-17		67	74	2	53.326	2	1			2	161	81	31.2488					1	2	2	1	2	2	2	2	2	2	2	2	2	2	2	2	2	2	2								2	2	2
26	5	2020-07-21	2020-07-21		9	63	2	42.406	2	1			2	149	80	36.0344	2	9999	9999	2	1	2	1	1	2	2	2	2	2	2	2	2	2	2	2	2	2	2	2								2	2	2
26	11	2020-06-18	2020-06-18		11	78	1	56.916		2	1	1	2	160	65	25.3906	2	2	2	2	1	2	2	2	2	2	2	1	2	2	2	2	2	2	2	2	2	2	2								2	2	2
26	36	2020-07-05	2020-07-04	11.191	81	61	2	45.136	2	1			2	152	112	48.4765	2	1	2	2	2	2	1	1	2	2	2	2	2	2	2	2	2	2	2	2	2	2	2								2	2	2
26	35	2020-06-10	2020-06-16	4.17222	35	66	2	44.226	2	1			2	151	75	32.8933	2	2	2	1	2	2	1	1	2	2	2	2	2	2	2	2	2	2	2	2	2	2	2								2	2	2
26	19	2020-05-29	2020-05-30	16.6667	34	71	1	54.186		2	1	1	2	157	73	29.6158	2	2	2	2	2	2	2	2	2	2	2	2	2	2	2	2	2	2	2	2	2	2	2								2	2	2
26	4		2020-05-30	3.66667	5	47	1	60.556		2	1	24	2	164	67	24.9108	2	2	2	2	1	9999	2	2	2	2	2	2	2	2	2	2	2	2	2	2	2	2	2								2	2	2
26	19	2020-06-11	2020-06-11	12.375	20		1	58.736		1			2	162	101	38.485	2	1	2	2	1	2	2	2	2	2	2	2	2	2	2	2	2	2	2	2	2	2	2								2	2	2
26	8	2020-07-20	2020-07-20	5.15139	13	47	1	61.466		2	1	7	2	165	85	31.2213	2	9999	9999	2	1	2	2	2	2	2	2	2	2	2	2	2	2	2	2	2	2	2	2								2	2	2
26	15		2020-06-17	12.109	15	62	1	66.926		1			2	171	91	31.1207					1
26	8	2020-06-13	2020-06-15		8		1	50.546		2	1	18	1	153	85	36.3108					1	2	2	2	2	2	2	2	2	2	2	2	2	2	2	2	2	2	2								2	2	2
26	8	2020-06-13	2020-06-15		8	33	1	50.546		2	1	18	2	153	85	36.3108					1
26	4		2020-06-17	3.08333	4	86	1	61.466		2	1	4	2	165	70	25.7117				1		2	1	1	1	2	2	2	2	2	2	2	2	2	2	2	2	2	2										2
26	2	2020-06-14	2020-06-18		5	45	2	46.956	2	1			2	154	103	43.4306				1			1
26	2	2020-06-10	2020-06-10		3	56	1			1			2								1	2	1	1	2	2	2	2	2	2	2	2	2	2	2	2	2	2									9999	9999	9999
26	3	2020-07-19	2020-07-19		37	47	1	64.196		2	1	1	2	168	73	25.8645	2	1	2	2	1	1	1	2	2	2	2	2	1	2	2	2	2	2	2	2	2	2	2								2	2	2
26	22	2020-07-06	2020-07-07	17.6347	13	57	2	47.866	2	1			2	155	82	34.1311	2	1	2	2	2	9999	1	2	2	2	2	2	2	2	2	2	2	2	2	2	2	2	2								2	2	2
26	2	2020-07-17	2020-07-17		2	80	1	67.836		1			2	172	74	25.0135	2	1	2	2	2	9999	1	1	1	2	2	2	2	2	2	2	2	2	2	2	2	2	2	2018-08-12	35	0	4				2	2	2
26	31	2020-06-18	2020-06-18		41	68	1	56.916		2	1		2	160	90	35.1562	2	2	2	2	1	2	1	2	2	2	2	2	2	2	2	2	2	2	2	2	2	2	2								2	2	2
26	4	2020-07-15	2020-07-15		14	36	2	47.866	2	1			2	155	78	32.4662	2	2	1		1	2	2	2	2	2	2	2	2	2	2	2	2	2	2	2	2	2	2								2	2	2
26	2	2020-07-17	2020-07-17		44	49	1	67.836		1			2	172	92	31.0979	2	2	1	2	1	2	1	2	2	2	2	2	2	2	2	2	2	2	2	2	2	2	2								2	2	2
26	27	2020-06-17	2020-06-19		36	72	1	68.746		2	1	18	2	173	92	30.7394	2	2	2	1	1	2	2	2	2	2	2	2	2	2	2	2	2	2	2	2	2	2	2								2	2	2
26	10	2020-06-19	2020-06-19		10	56	1	53.276		2	1		2	156	74	30.4076	2	1	2	2	1	2	2	2	2	2	2	9999	9999	9999	9999	9999	9999	9999	9999	9999	9999	9999	9999								9999	9999	9999
26	9	2020-06-19	2020-06-19	4.29444	13	58	1	66.926		1			2	171	72	24.623	2	1	2	2	1	2	1	1	2	2	2	2	2	2	2	2	2	2	2	2	2	2	2								2	2	2
26	9	2020-06-19	2020-06-19		20	68	1	56.916		2	1	1	2	160	85	33.2031	2	1	2	2	2	2	2	2	2	2	2	2	2	2	2	2	2	2	2	2	2	2	2								2	2	2
26	6	2020-06-19	2020-06-19		40	70	1	48.726		2	1	2	2	151	113	49.5592	2	1	2	1	9999	9999	1	1	9999	9999	9999	9999	9999	9999	9999	9999	9999	9999	9999	9999	9999	9999	9999	2016-12-09	68	0	4				2	2	9999
26	32	2020-06-19	2020-06-19	30.375	33	59	1	54.186		1			2	157	106	43.0038	2	2	2	2	1	2	1	1	2	2	2	2	2	2	2	2	2	2	2	2	2	2	2	2017-06-04	65	0	4				9999	9999	1
26	5	2020-05-29	2020-05-29		7	82	1	60.556		1			2	164	67	24.9108	2	2	2	2	1	2	2	2	2	2	2	2	2	2	2	2	2	2	2	2	2	2	2	2020-02-18	45	0					2	2	2
26	8	2020-06-04	2020-06-08		20	71	1	71.476		2	1	6	2	176	98	31.6374	2	2	2	2	1	9999	1	1	9999	9999	9999	9999	9999	9999	9999	9999	9999	9999	9999	9999	9999	9999	9999								9999	9999	9999
26	2	2020-06-08	2020-06-08	1.37153	2	71	2	70.616	2	1			2	180	69	21.2963	2	2	2	2	1	2	1	1	9999	9999	9999	9999	9999	9999	9999	9999	9999	9999	9999	9999	9999	9999	9999	2020-10-31	56	0	4				9999	9999	1
26	8	2020-06-08	2020-06-08	3.45833	18	55	1	73.296		2	1		2	178	80	25.2493					1	2	1	2	2	2	2	2	1	2	2	2	2	2	2	2	2	2	2								2	2	1
26	11	2020-06-09	2020-06-09		17	60	1	61.466		2	1	7	2	165	77	28.2828	2	2	2	2	9999	2	1	1	2	2	2	2	2	2	2	2	2	2	2	2	2	2	2								2	2	2
27	11	2020-05-10	2020-05-11	11.3083	11	75	2	65.156	2	1			2	174	86	28.4053		1				2	2	2	2	9999	9999	9999	9999	9999	9999	9999	9999	9999	9999	9999	9999	9999	9999								2	2	2
27	2	2020-07-27	2020-07-31		11	83	1	56.916		1			2	160	90	35.1562		1					1	1		1															25	0					9999	9999	9999
27	20	2020-05-25	2020-06-10	12.6667	42	53	2	50.596	2	1			2	158	62	24.8358	2	1	1	2	2	2	2	1	2	2	2	2	2	2	2																2	2	2
27	52	2020-06-12	2020-06-12	32	69	65	2	44.226	2	1			2	151	77	33.7704	2	1	1	2	2	2	1	1	2	2	2	2	2	2	2	2	2	2	2	2	2	2	2	2020-10-10							2	2	2
27	25	2020-06-10	2020-06-08	20.5833	92	71	2	56.056	2	2	1	10	2	164	120	44.6163	2	1	2	2	2	2	1	2	1	2	2	2	2	2	2	2	2	2	2	2	2	2	2	2020-06-09	62	1	4				2	2	2
27	34	2020-05-25	2020-05-25	1.54236	36	47	2	57.876	2	1			2	165	113	41.5	2	2	2	1	1	2	2	2	2	2	2	2	2	2	2	2	2	2	2	2	2	2	2								2	2	2
27	3	2020-06-14	2020-06-14	2	5	50	2	56.966	2	1			2	165	60	22.0386	2	2	2	2	1	2	1	2	2	2	2	2	2	2	2	2	2	2	2	2	2	2	2								2	2	2
27	2	2020-06-26	2020-06-29		8	37	1	59.646		1			1	163	93	35.0032	2	1	2	1	2	2	2	1	2	2	2	2	2	2	2	2	2	2	2	2	2	2	2								2	2	2
27	18	2020-06-20	2020-06-20		18	70	1	73.296		2	1	9	2	178	98	30.9304	2	2	2	1	2	2	2	2	2	2	2	2	2	2	2	2	2	2	2	2	2	2	2								2	2	2
27	7	2020-06-30	2020-06-26		19	48	1	52.366		2	1	3	2	155	65	27.0552			1			2	2	2	2	2	2	2	2	2	2	2	2	2	2	2	2	2	2								2	2	2
27	16	2020-05-20	2020-05-24		16	36	1	66.016		2	1	9	2	170	84	29.0657	2	1	2	2	2	2	2	2	2	2	2	2	2	2	2	2	2	2	2	2	2	2	2								2	2	2
27	68	2020-06-16	2020-06-18		13	51	1	75.116		2	1	4	1	180	80	24.6914	2	2	2	1	2	2	2	2	2	2	2	2	2	2	2	2	2	2	2	2	2	2	2								2	2	2
26	30	2020-06-03	2020-06-06	4.19514	37	57	1	61.466		1			2	165	84	30.854				1	1			1	1		1		1
27	24	2020-06-23	2020-06-23	26.1778	24	52	1	61.466		2	1	1	2	165	70	25.7117		1	1				1
27	26	2020-05-30	2020-05-28	23.1521	26	63	1	76.026		2	1	26	2	181	70	21.3669		1	1				1
27	27	2020-05-26	2020-05-27		27	70	1	61.466		2	1			165	85	31.2213		1						1
27	43	2020-05-25	2020-05-24		44	56	1			2	1	3	2								1			1
24	7	2020-05-23	2020-05-26	2.58333	19	36	1	62.376		2	1	9	2	166	105	38.1042	9999	9999	9999	9999	1	2	2	2	2	2	2	2	2	2	2	9999	9999	2	2	2	2	2	2								2	2	2
27	10	2020-06-22	2020-06-22		9	76	1			2	1	11	2							1				1
27	11	2020-07-06	2020-06-21	2.04444	23	74	2	43.316	2	1			2	150	58	25.7778					1		1	1
26	7	2020-06-28	2020-06-29		31	32	1	81.486		2	1	2	2	187	99	28.3108					1	9999	9999	9999	9999	9999	9999	9999	9999	9999	9999	9999	9999	9999	9999	9999	9999	9999	9999								9999	9999	9999
26	1	2020-10-09	2020-10-09		1	87	2	48.776	2	1			2	156	63	25.8876					1		1	1																							9999	9999	9999
26	5	2020-06-15	2020-06-15		8	47	1						2		95						1	2	2	2	2	2	2	2	2	2	2	2	2	2	2	2	2	2									2	2
26	22	2020-06-15	2020-05-26	0	13	87	1	61.466		1				165	78	28.7					1	2	1	2	2	2	2	2	2	2	2	2	2	2	2	2	2	2	2								2	2	2
26	15	2020-06-10	2020-06-14		29	35	1			2	1	10	2								1	2	2	2	2	2	2	2	2	2	2	2	2	2	2	2	2	2	2								2	2	2
26	30	2020-06-12	2020-06-12		42	86	1	53.276		1			2	156	45	18.4911					1																										9999	9999	9999
26	7	2020-06-09	2020-06-11		11	32	1	61.466		2			2	165	76	27.9155					1	2	2	2	2	2	2	2	2	2	2	2	2	2	2	2	2	2	2								9999	9999	9999
26	31	2020-05-28	2020-05-28	23.375	31	72	1	66.016		1			2	170	80	27.6817					1		1	1	1																						9999	9999	1
26	13	2020-05-24	2020-05-28	-43979.6	19	57	1	65.106		1			2	169	97	33.9624					1		1		1																						9999	9999	9999
26	6	2020-06-01	2020-05-22		16	37	1			2	1	2	2		78			1				2	2	2	2	2	2	2	2	2	2	2	2	2	2	2	2	2	2								9999	9999	9999
26	26	2020-05-27	2020-05-27		31	63	1			2	1	2	2		96		9999	9999	9999	9999	1	2	2	2	2	2	2	2	2	2	2	1	1	1	2	2	2	2	2								2	2	2
26	13	2020-05-29	2020-05-27	7.375	27		1	66.926		2	1	1	2	171	90	30.7787					1	9999	9999	9999	9999	9999	9999	9999	1	9999	9999	9999	9999	9999	9999	9999	9999	9999	9999								9999	9999	9999
26	5	2020-06-01	2020-06-01		18	32	1	65.106		2	1	11	2	169	80	28.0102					1	2	2	2	2	2	2	2	2	2	2	2	2	2	2	2	2	2	2								2	2	2
26	66	2020-05-20	2020-05-29	16.9167	85	68	1	66.016		2		8	2	170	80	27.6817					1	9999	9999	9999	9999	9999	9999	9999	9999	9999	9999	9999	9999	9999	9999	9999	9999	9999	9999								9999	9999	9999
26	2	2020-05-13	2020-05-13		2	69	1	76.026		2	1		2	181	97	29.6084					1	1	2	1	2	2	2	2	2	2	2	2	2	2	2	2	2	2	2								9999	9999	9999
26	21	2020-05-20	2020-05-20	16.125	34		2	55.146	1	1			2	163	68	25.5937					1	2	2	2	2	2	2	2	2	2	2	2	2	2	2	2	2	2	2								2	2	2
26	9	2020-05-24	2020-05-24	7.25	9	63	1	72.386		2	1	6	2	177	75	23.9395					1	9999	1	1	9999	9999	9999	9999	9999	9999	9999	9999	9999	9999	9999	9999	9999	9999	9999								9999	9999	9999
26	4	2020-06-28	2020-06-27		4	60	1			1			2								1	2	1	1	2	2	2	2	2	2	2	2	2	2	2	2	2	2	2								9999	9999	9999
26	2	2020-06-22	2020-06-24		1	60	1			1			2								1	2	2	2	2	2	2	2	2	2	2	2	2	2	2	2	2	2	2								2	2	2
26	10	2020-06-21	2020-06-21	9.04167	28	48	1	59.646		1			2	163	80	30.1103					1		1																								9999	9999	9999
26	3	2020-06-01	2020-06-01		49	74	2	52.416	2	1			2	160	73	28.5156					1	2	1	1																							9999	9999	9999
26	3	2020-06-02	2020-06-01	0	2	64	2	59.696	2	1			2	168	85	30.1162					1	9999	9999	9999	9999	9999	9999	9999	9999	9999	9999	9999	9999	9999	9999	9999	9999	9999	9999								9999	9999	9999
26	6	2020-05-29	2020-05-29	0	7	63	1	59.646		1			2	163	107	40.2725					1	9999	1	9999	9999	9999	9999	9999	9999	9999	9999	9999	9999	9999	9999	9999	9999	9999	9999								9999	9999	9999
26	1	2020-07-01	2020-07-01	0	1	74	1	64.196		1			2	168	65	23.03					1		1	1																							2	2	2
26	9	2020-06-27	2020-06-27	0	9	75	1	63.286		1			2	167	79	28.3266					1	1	1	1																							9999	9999	9999
26	1	2020-07-06	2020-07-07	0	22	75	1	56.916		1			2	160	110	42.9688					1		1	1																							9999	9999	9999
26	1	2020-07-07	2020-07-07		10	68	2	54.236		1			2	162	65	24.7676					1		1	1																							9999	9999	9999
26	8	2020-07-11	2020-07-11	7.01528	8	57	2		2	1			2					1					1	1
26	3	2020-07-12	2020-07-12		4	31	1	53.276		1			2	156	85	34.9277																															9999	9999	9999
26	13	2020-07-16	2020-07-16	10.9681	13	94	1	57.826		1			2	161	78	30.0914					1	9999	1	1	9999	9999	9999	9999	9999	9999	9999	9999	9999	9999	9999	9999	9999	9999	9999								9999	9999	9999
26	4	2020-07-19	2020-07-19		9	68	2	46.956	2	1			2	154	96	40.479					1	2	1	1	1																						2	2	1
26	2	2020-07-28	2020-07-28		4	77	2	50.596	2	1			2	158	69	27.6398					1		1	1
26	74	2020-07-16	2020-07-16	64.8368	90		1	56.916		1			2	160	60	23.4375					1	2	2	2	2	2	2	2	2	2	2	2	2	2	2	2	2	2									9999	9999	9999
26	3	2020-07-06	2020-07-06		14			54.186		1			1	157	93	37.7297					1	9999	1	1	9999	9999	9999	9999	9999	9999	9999	9999	9999	9999	9999	9999	9999	9999	9999								9999	9999	9999
24	25	2020-06-18	2020-06-12	9.36597	25	72	2	58.786	2	1			2	167	100	35.8564	2	2	2	2	2	2	2	1	2	2	2	2	2	2	2	2	2	2	2	2	2	2	2								2	2	2
24	8	2020-05-27	2020-05-27	5.28681	28	33	1	81.486		1			2	187	96	27.4529	2	2	2	2	2	2	2	2	2	2	2	2	2	2	2	2	2	2	2	2	2	2	2								2	2	2
24	6	2020-06-09	2020-06-16		49	59	1	62.376		2	2	1	2	166	69	25.0399	2	2	2	2	2	2	2	2	2	2	2	2	2	2	2	2	2	2	2	2	2	2	2								2	2	2
24	12	2020-05-30	2020-05-30	11.325	39	36	1	70.566		2	1	24	2	175	97.8	31.9347					2	2	2	2	2	2	2	2	2	2	9999	2	2	2	2	2	2	2	2								2	2	2
24	17	2020-06-13	2020-06-13	15	17	83	1	66.016		1			2	170	89	30.7958	9999	9999	9999	9999	9999	9999	1	1	2	2	2	2	2	2	2	2	2	2	2	2	2	2	2								2	2	1
24	14	2020-06-04	2020-05-31	13.3472	14	43	1	70.566		2	1	2	2	175	90	29.3878					1	2	2	2	2	2	2	2	2	2	2	2	2	2	2	2	2	2	2								2	2	2
24	13	2020-06-24	2020-06-24	13	13	79	1	64.196		2	1	1	2	168	90	31.8878	9999	9999	9999	9999	9999	2	2	2	2	2	2	2	2	2	2	2	2	2	2	2	2	2	2								2	2	2
24	4	2020-07-21	2020-06-25		29	55	1	67.836		1			2	172	85	28.7317					1	2	1	1	2	2	9999	2	1	2	2	2	2	2	2	2	2	2	2								2	2	2
24	42	2020-05-27	2020-05-28	23	50	70	2		2	2	1	11	2		97						1	2	1	2	2	2	2	2	2	2	2	2	2	2	2	2	2	2	2	2020-07-02							2	2	2
24	6	2020-06-18	2020-06-26	13.3799	30	68	1	56.916		2	1	5	2	160	90	35.1562	9999	9999	9999	9999	1	2	1	1	1	2	2	2	2	2	2	2	2	2	2	2	2	2	2								9999	9999	1
24	19	2020-06-01	2020-06-03	15	9	63	1	75.116		2	1	6	2	180	118	36.4198					1	2	2	1	9999	2	2	2	2	2	2	1	1	2	2	2	2	2	2								2	2	2
24	6	2020-06-09	2020-06-13	9.38333	10	76	1	70.566		2	1	17	2	175	80	26.1224	9999	9999	9999	9999	1	2	1	2	2	2	2	2	2	2	2	2	1	2	2	2	2	2	2								2	2	2
24	5	2020-06-16	2020-06-20		15	75	2	57.876	2	1			2	166	67	24.3141					1	2	1	2	2	2	2	2	2	2	2	2	2	2	2	2	2	2	2								2	2	2
24	18	2020-06-17	2020-06-21	9.55556	24	60	1	81.486		1			2	187	80	22.8774	9999	9999	9999	9999	1	2	1	2	2	2	2	2	2	2	2	2	2	2	2	2	2	2	2								2	2	2
24	6	2020-06-26	2020-06-24		8	62	1	65.106		1			2	169	86	30.111	9999	9999	9999	9999	1	9999	9999	1	9999	1	2	2	2	2	2	2	2	2	2	2	2	2	2								1	2	2
24	1	2020-06-04	2020-07-04		3	45	1	75.116		1			2	180	100	30.8642	9999	9999	9999	9999	1	1	2	2	2	2	2	2	2	2	2	2	2	2	2	2	2	2	2								2	2	2
24	2	2020-05-27	2020-06-02		16	62	1	66.016		2	1	5	2	170	95	32.872	9999	9999	9999	9999	1	2	1	1	2	2	2	2	2	2	2	2	2	2	2	2	2	2	2								2	2	2
24	14	2020-05-30	2020-06-10		35	59	1	55.096		2	1	6	2	158	74	29.6427					1	2	2	2	2	2	2	2	2	2	2	2	2	2	2	2	2	2	2								2	2	2
24	3	2020-05-18	2020-05-19	2.23611	4	44	1	71.476		2	1		2	176	78	25.1808					1	2	1	2	2	2	2	2	2	2	2	2	2	2	2	2	2	2	2								2	2	2
24	10	2020-06-17	2020-06-18		10	44	1	73.296		2	1	2	2	178	98	30.9304	9999	9999	9999	9999	1	1	9999	9999	2	9999	9999	9999	9999	9999	9999	9999	9999	9999	9999	9999	9999	9999	9999								9999	9999	9999
24	10	2020-05-16	2020-05-16	9.31944	12	44	1	61.466		2	1	1	2	165	75	27.5482	9999	9999	9999	9999	1	2	2	2	2	2	2	2	2	2	2	2	2	2	2	2	2	2	2								2	2	2
24	7	2020-05-30	2020-05-30	21.3333	21	20	1	73.296		1			2	178	82	25.8806	2	1	1	2	2	2	2	2	2	2	2	2	2	2	2	2	2	2	2	2	2	2	2								9999	9999	2
24	7	2020-05-19	2020-05-23	6.08333	9	33	1	79.666		1			2	185	133	38.8605	9999	9999	9999	9999	1	2	2	2	2	2	2	2	2	2	2	2	2	2	2	2	2	2	2								2	2	2
24	3		2020-06-15		14	54	1	67.836		1			2	172	65	21.9713	9999	9999	9999	9999	1	2	2	1	2	2	2	2	1	2	2	2	2	2	2	2	2	2	2								2	2	2
24	1	2020-05-30	2020-06-01		9	69	1	76.936		1			2	182	98	29.5858	9999	9999	9999	9999	1	2	1	1	2	2	2	2	2	2	2	2	2	2	2	2	2	2	2								2	2	2
24	9	2020-06-06	2020-06-06	6	28	34	2		1	2	1	24	2				9999	9999	9999	9999	1	1	9999	9999	9999	9999	9999	9999	1	9999	9999	9999	9999	9999	9999	9999	9999	9999	9999								2	2	2
24	3	2020-05-07	2020-05-07		4	82	1	72.386		1			2	177	69.7	22.2478	9999	9999	9999	9999	1	2	2	2	2	2	2	2	2	2	2	2	2	2	1	1	2	1	2								2	2	2
24	9	2020-05-26	2020-05-29		18	80	2	59.696	2	1			2	168	90	31.8878	9999	9999	9999	9999	1	2	1	1	1	1	1	2	2	2	2	1	2	2	2	2	2	2	2								2	1	2
24	4	2020-05-08	2020-05-08	2.33333	4	42	1	70.566		2	1	1	2	175	85	27.7551	9999	9999	9999	9999	1	9999	1	2	2	2	2	2	2	9999	9999	9999	9999	9999	9999	9999	9999	9999	9999								9999	9999	9999
24	5	2020-06-11	2020-06-11		16	60	1	63.286		2	1	5	2	167	70	25.0995	2	1	2	2	2	2	1	2	2	2	2	2	2	2	2	2	2	2	2	2	2	2	2								2	2	2
24	3		2020-06-17	17	4	47	1	66.016		2	1	1	2	170	75	25.9516	9999	9999	9999	9999	1	2	2	2	2	2	2	2	2	2	2	2	2	2	2	2	2	2	2								2	2	2
24	5	2020-06-10	2020-06-16	11	5	65	1	52.366		2	1	7	2	155	82	34.1311	9999	9999	9999	9999	1	2	1	1	2	2	2	2	2	2	2	2	1	2	2	2	2	2	2								2	2	2
24	139	2020-06-01	2020-06-16	41	139	55	1	67.836		2	1	2	2	172	70	23.6614	9999	9999	9999	9999	1	1	1	1	2	2	2	2	2	2	2	2	2	2	2	2	2	2	2								2	2	2
24	21	2020-06-04	2020-06-04	10.5833	31	39	2	56.966	2	2	1	serbian	2	165	65	23.8751	9999	9999	9999	9999	1	2	2	2	2	2	2	2	2	2	2	2	2	2	2	2	2	2	2								2	2	2
24	14	2020-06-09	2020-06-09	11.8333	14	47	2	48.776		1			2	156	75	30.8185	2	2	2	2	1	2	2	2	2	2	2	2	2	2	2	2	2	2	2	2	2	2	2								2	2	2
24	19	2020-05-30	2020-06-01	8.85417	37	64	1	58.736		2	1	5	2	162	75	28.578	9999	9999	9999	9999	1	2	1	1	2	2	2	2	2	2	2	2	2	2	2	2	2	1	2								2	2	2
24	21	2020-06-07	2020-06-07	20.2882	22	89	1	66.016		1			2	170	80	27.6817	9999	9999	9999	9999	1	2	1	1	2	2	2	2	2	2	2	2	2	2	2	2	2	2	2								2	2	2
24	21	2020-05-07	2020-05-07		25	65	1	76.936		1			2	182	71	21.4346	9999	9999	9999	9999	9999	2	1	1	2	2	2	2	2	2	2	1	2	2	1	2	2	2	2								2	2	2
24	11	2020-05-10	2020-05-12	6.45833	23	47	1	73.296		2	1	9	2	178	115	36.2959	9999	9999	9999	9999	9999	2	2	2	2	2	2	2	1	2	2	2	2	2	2	2	2	2	2								2	2	2
24	16	2020-05-27	2020-05-29	12.875	17	45	1	66.016		1			2	170	125	43.2526	9999	9999	9999	9999	1	2	2	1	2	2	2	2	1	2	2	2	2	2	2	2	2	2	2								2	2	2
24	44	2020-05-20	2020-05-22	29.0417	49	39	1	66.016		2	1	belgian	2	170	89	30.7958	9999	9999	9999	9999	1	2	2	2	2	2	2	2	2	2	2	2	2	2	2	2	2	2	2	2020-10-04		0					2	2	2
24	8	2020-05-27	2020-05-27	6.375	29	33	1	76.936		2	1	2	2	182	96	28.982	9999	9999	9999	9999	1	9999	2	2	2	2	9999	2	2	2	2	2	2	2	2	2	2	2	2								2	2	2
24	53	2020-06-10	2020-06-12	5.36111	71	60	1	66.016		2	1	siovuac	2	170	89	30.7958	9999	9999	9999	9999	1	9999	9999	9999	9999	9999	9999	9999	9999	9999	9999	9999	9999	9999	9999	9999	9999	9999	9999								9999	9999	9999
24	19	2020-05-20	2020-05-21	13	20	52	1	66.016		1			2	170	91	31.4879	9999	9999	9999	9999	1	2	2	2	2	2	2	2	2	2	2	2	2	2	2	2	2	2	2								2	2	2
24	9	2020-06-12	2020-06-12		16	62	1	71.476		2	1	1	2	176	89	28.7319	9999	9999	9999	9999	1	2	1	1	1	2	2	2	2	2	2	2	2	2	2	2	2	2	2								2	1	1
24	11	2020-05-21	2020-05-24	11.3889	11	68	1	67.836		1			2	172	100	33.8021	2	1	2	2	2	2	1	1	2	2	2	2	2	2	2	2	2	2	2	2	2	2	2								2	2	2
13	9	2020-05-16	2020-05-12		6	40	1	61.466		2	1		2	165	80	29.3848	9999	9999	9999	9999	1	9999	9999	9999	9999	9999	9999	9999	9999	9999	9999	9999	9999	9999	9999	9999	9999	9999	9999								2	2	2
13	8	2020-05-13	2020-05-17		17	42	1	70.566		2	1	12	1	175	85	27.7551	2	1	2	2	2	9999	2	2	2	2	2	2	2	2	2	2	2	2	2	2	2	2	2								2	2	2
13	25	2020-05-06	2020-05-07	17.2917	26	50	1	56.916		2	2		2	160	80	31.25	2	2	2	2	1	2	2	2	2	2	2	2	2	2	2	2	2	2	2	2	2	2	2								2	2	2
13	9	2020-06-04	2020-05-08	5.47917	9	64	2	47.866	2	1			2	155	60	24.974	2	2	2	2	1	2	1	1	1	2	2	2	2	2	2	1	1	2	2	2	2	2	2								2	2	9999
13	11	2020-05-02	2020-04-28		33	60	1	64.196		2	1	6	2	168	70	24.8016	9999	9999	9999	9999	1	9999	2	2	2	2	2	2	2	2	2	2	2	2	2	2	2	2	2								2	2	2
13	5	2020-05-02	2020-05-02		5	59	1	56.916		1			2	160	85	33.2031	2	2	2	2	1	2	2	2	2	2	2	2	2	2	2	2	2	2	2	2	2	2	2								2	2	2
13	13		2020-05-05		31	68	1	66.016		2	1		2	170	89	30.7958	2	2	2	2	1	9999	2	2	2	2	2	2	2	2	2	1	2	2	2	2	2	2	2								2	2	2
13	26	2020-04-30	2020-04-21		35	24	1	70.566		2	1		2	175	85	27.7551	9999	9999	9999	9999		1	2	2	2	2	2	2	2	2	2	2	2	2	2	2	2	2	2								2	2	2
13	3	2020-05-04	2020-05-06		16	99	2	47.866	2	2	1		2	155	60	24.974	2	1	2	2	2	1	2	2	2	2	2	2	2	2	2	2	2	2	2	2	2	2	2								2	2	2
13	2	2020-04-29	2020-05-04		19	44	1	56.916		1			1	160	60	23.4375	9999	9999	9999	9999	2	2	2	2	2	2	2	2	2	2	2	2	2	2	2	2	2	2	2	2020-05-03							2	2	9999
13	14	2020-05-09	2020-05-17	-43970	22	35	1	67.836		2	1		2	172	80	27.0416	9999	9999	9999	9999	9999	2	2	2	2	2	2	2	2	2	2	2	2	2	2	2	2	2	2								2	2	2
13	3		2020-05-23		13	34	1	70.566		1			2	175	75	24.4898	2	2	2	2	1	1	2	2	2	2	2	2	2	2	2	2	2	2	2	2	2	2	2								2	2	2
13	2	2020-05-06	2020-05-09	1.375	2	61	1	66.016		2	1		2	170	60	20.7612	2	2	2	2	2	2	2	2	2	2	2	2	2	2	2	2	2	2	2	2	2	2	2								2	2	2
13	35	2020-04-10	2020-04-09	33.5417	36	45	1	61.466		2	1		2	165	70	25.7117	9999	2	2	2	1	2	1	2	1	2	2	2	2	2	2	2	2	2	2	2	2	2	2								2	2	2
13	8	2020-05-08	2020-05-10		20	75	1	55.096		2	1		2	158	70	28.0404	9999	9999	9999	9999	1	2	1	2	2	2	2	2	2	2	2	2	2	2	2	2	2	2	2								2	2	2
13	5	2020-05-18	2020-05-21		12	45	1	56.916		2	1	1	2	160	82	32.0312	2	2	2	2	1	2	2	2	2	2	2	2	2	2	2	2	2	2	1	2	2	2	2								2	2	2
13	9	2020-05-12	2020-05-10	6.79167	10	54	1	61.466		1			2	165	75	27.5482	9999	9999	9999	9999	1	2	2	2	2	2	2	2	2	2	2	2	2	2	2	2	2	2	2								2	2	2
13	3		2020-05-02	2.24653	3		1	66.016		2	1		2	170	70	24.2215	9999	9999	9999	9999	1	2	2	2	2	2	2	2	1	2	2	2	2	2	2	2	2	2	2								2	2	2
13	5	2020-05-07	2020-05-07		6	45	1	64.196		2	1		1	168	70	24.8016	2	1	2	2	2	2	2	2	2	2	2	2	2	2	2	2	2	2	2	2	2	2	2								2	2	2
13	7	2020-05-04	2020-05-05	7.78125	8	57	1	67.836		2	1		2	172	70	23.6614	2	2	2	2	1	2	2	2	2	2	2	2	2	2	2	2	2	2	2	2	2	2	2								2	2	2
5	1	2020-06-13	2020-06-13		5		2	43.316	2	2	1	11	2	150	60	26.6667	1	2	2	2	2	2	2	1	2	2	2	2	2	2	2	2	2	2	2	2	2	2	2								2	2	2
5	9	2020-06-13	2020-06-13		17		1	61.466		2	1	2	2	165	85	31.2213	2	2	2	2	1	2	1	2	2	2	2	2	2	2	2	2	2	2	2	2	2	2	2								2	2	2
5	12	2020-06-13	2020-06-13		13	43	1	79.666		2	1	3	2	185	50	14.6092	2	2	2	2	1	2	2	2	2	2	2	2	2	2	2	2	2	2	2	2	2	2	2								2	2	2
5	14	2020-06-14	2020-06-16	10.5	14	43	1	79.666		2	1	3	2	185	50	14.6092	2	2	2	2	1	2	1	2	2	2	2	2	2	2	2	2	2	2	2	2	2	2	2								2	2	2
9	3	2020-05-02	2020-04-30		13	49	1			2	1	21	2				2	2	2	2	2	2	2	1	2	2	2	2	2	2	2	2	2	2	2	2	2	2	2								2	2	2
9	18	2020-05-16	2020-05-02	17.1667	18	51	1	67.836		2	1	3	2	172	76	25.6896	9999	9999	9999	9999	9999	2	2	2	2	2	2	2	2	2	2	2	2	2	2	2	2	2	2								2	2	2
9	4	2020-05-01	2020-05-02		5	35	1			2	1	3	2		70		2	2	2	2	2	2	2	2	2	2	2	2	2	2	2	2	2	2	2	2	2	2	2								2	2	2
9	5	2020-05-04	2020-05-04	2.375	5		1								60		9999	9999	9999	9999	9999	2	1	1	2	2	2	2	2	2	2	2	2	2	2	2	2	2	2								2	2	2
9	4	2020-05-05	2020-05-05		4	31	2		2	1			2				2	2	2	2	2	2	1	1	2	2	2	2	2	2	2	2	2	2	2	2	2	2	2								9999	9999	9999
9	1	2020-05-06	2020-05-05	0.5	1	51	1			2	1	3	2		85		9999	9999	9999	9999	9999	2	2	2	2	2	2	2	2	2	2	2	2	2	2	2	2	2	2								9999	9999	9999
9	4	2020-05-05	2020-05-05		4	56	1			2	1	3	2		70		2	2	2	2	2	2	2	2	2	2	2	2	2	2	2	2	2	2	2	2	2	2	2								2	2	2
9	2	2020-05-05	2020-05-06		2	44	1			2	1	3	2		72		9999	9999	9999	9999	9999	2	2	2	2	2	1	2	2	2	2	2	2	2	2	2	2	2	2								2	2	2
9	3	2020-05-08	2020-05-08		4	44	1			2	1	5	2		90		2	2	2	2	2	1	1	1	2	2	2	2	2	2	2	2	2	2	2	2	2	2	2								2	2	2
9	5	2020-05-11	2020-05-12	4.04167	6	55	1	55.096		2	1	3	2	158	54	21.6311	2	2	2	2	2	2	2	2	2	2	2	2	2	2	2	2	2	2	2	2	2	2	2								2	2	2
9	7	2020-06-30	2020-07-01		10	32	1	75.116		2	1	3	2	180	75	23.1481	2	2	2	2	2	2	2	2	2	2	2	2	2	2	2	2	2	2	2	2	2	2	2								2	2	2
9	11	2020-05-18	2020-05-21	9.54028	11		2	56.966	2	2	2		2	165	62	22.7732	2	2	2	2	2	2	2	2	2	2	2	2	2	2		2	2	2	2	2	2	2	1								9999	9999	9999
9	8	2020-05-23	2020-05-29	7.5	8	52	1	74.206		2	1	3	2	179	77	24.0317	2	2	2	2	1	2	2	2	2	2	2	2	2	2	2	2	2	2	2	2	2	2	2								2	2	2
9	12	2020-05-15	2020-05-19	9.5	14	53	1	61.466		2	1	5	2	165	70	25.7117	2	2	2	2	1	2	2	2	2	1	2	2	2	2	2	1	1	1	2	2	2	2	2								9999	9999	9999
9	17	2020-05-21	2020-05-24	19.5	17	27	1	66.926		2	1	2	2	171	80	27.3588	2	2	2	2	1	2	2	2	2	2	2	2	2	2	2	2	2	2	2	2	2	2	2								2	2	2
9	10	2020-05-19	2020-05-29	6.5	10	77	1	61.466		2	1	9	2	165	111	40.7713	2	2	2	2	1	2	1	1	2	2	2	2	2	2	2	2	2	2	2	2	2	2	2								9999	9999	2
9	3	2020-04-28	2020-05-01		11	60	1	66.926		2	1	3	2	171	67	22.913	2	2	2	2	1	2	1	2	1	2	2	2	2	2	2	2	2	2	2	2	2	2	2								9999	9999	9999
9	4	2020-05-02	2020-05-02	0.5	4	52	1	65.106		2	1	1	2	169	77	26.9598	2	2	2	2	1	9999	9999	9999	9999	9999	9999	9999	9999	9999	9999	9999	9999	9999	9999	9999	9999	9999	9999								9999	9999	9999
9	4	2020-04-13	2020-04-16		19	28	1	65.106		2	1	2	2	169	92	32.2118	2	2	2	2	1	2	2	2	2	2	2	2	2	2	2	2	2	2	2	2	2	2	2								2	2	2
9	3	2020-04-29	2020-04-29	2.55556	3	42	2	45.136	2	1			2	152	90	38.9543	2	2	2	2	1	2	1	1	2	2	2	2	2	2	2	2	2	2	2	2	2	2	2								2	2	2
9	2	2020-04-19	2020-05-15	0.0520833	1	45	1	52.416		2	1	3	2	163	66	24.841	2	1	2	2	2	2	2	1	2	1	2	2	2	2	2	2	2	2	2	2	2	2	2								9999	9999	9999
9	6	2020-05-03	2020-05-05	6.5	6	45	1	57.826		2	1	1	2	161	70	27.0051	2	2	2	2	1	2	2	2	2	2	2	2	2	2	2	2	2	2	2	2	2	2	2								2	2	2
9	3	2020-05-20	2020-05-25	6.5	3	43	1	66.016		2	1	3	2	170	68	23.5294	2	2	2	2	1	2	2	2	2	2	2	2	1	2	2	2	2	2	2	2	2	2	2								2	2	2
9	2	2020-04-24	2020-04-27		16	31	1	74.206		2	1	2	2	179	74	23.0954	2	2	2	2	1	2	1	2	2	2	2	2	2	2	2	2	2	2	2	2	2	2	2								2	2	2
9	1	2020-05-17	2020-05-21		10	58	1	63.286		2	1	3	2	167	62	22.231	2	2	2	2	1	2	1	1	2	2	2	2	2	2	2	2	2	2	2	2	2	2	2								9999	9999	2
9	3	2020-05-25	2020-05-27	2.73611	3	53	1	79.666		2	1	9	2	185	102	29.8028	2	2	2	2	1	2	1	2	2	2	2	2	2	2	2	2	2	2	2	2	2	2	2								2	2	2
9	33	2020-05-10	2020-05-17	34.5	33	53	2	52.416	2	2	1	1	2	160	60	23.4375	2	1	2	2	2	2	1	2	2	2	2	2	2	2	2	2	2	2	2	2	2	2	2								2	2	2
9	6	2020-05-04	2020-05-13	-0.3125	6	45	2	56.966	2	2	1	9	2	165	94	34.5271	2	1	2	2	2	2	1	2	2	2	2	2	2	2	2	2	2	2	2	2	2	1	2								2	2	2
9	95	2020-04-14	2020-04-14		95	39	1	60.556		2	1	2	2	164	80	29.7442	2	2	2	2	1	2	2	2	2	2	2	2	2	2	2	2	2	2	2	2	2	2	2								2	2	2
9	3	2020-04-14	2020-04-15	1.55278	4	52	1	66.016		2		2	2	170	90	31.1419	2	2	2	2	1	2	2	2	2	2	2	2	2	2	2	2	2	2	2	2	2	2	2								2	2	2
9	6	2020-05-12	2020-05-19	5.5	6	38	1	66.016		2	1	15	2	170	75	25.9516	2	2	2	2	1	9999	9999	9999	9999	9999	9999	9999	9999	9999	9999	9999	9999	9999	9999	9999	9999	9999	9999								9999	9999	9999
9	5	2020-05-28	2020-05-28	3.5625	5	67	2	39.676	2	2	1	1	2	146	70	32.8392	2	1	2	2	2	2	1	1	2	2	2	2	2	2	2	2	2	2	2	2	2	2	2								9999	9999	9999
9	5	2020-05-23	2020-05-23	5.5	5	45	1	60.556		2	1	1	2	164	61	22.68	2	2	2	2	1	2	2	2	2	2	2	2	2	2	2	2	2	2	2	2	2	2	2								2	2	2
9	6	2020-05-25	2020-05-29	9.5	6	56	1	66.016		2	1	5	2	170	70	24.2215	2	2	2	2	1	9999	9999	9999	9999	9999	9999	9999	9999	9999	9999	9999	9999	9999	9999	9999	9999	9999	9999								9999	9999	9999
9	16	2020-05-05	2020-05-05	12.5451	16	43	1	63.286		2	1	3	2	167	62	22.231	2	2	2	2	1	2	2	2	2	2	2	2	1	2	2	2	2	2	2	2	2	2	2								2	2	2
9	20	2020-04-18	2020-04-18	50.4514	20	42	1	58.736		2	1	1	2	162	82	31.2452	2	2	2	2	1	2	1	1	2	2	2	2	2	2	2	2	2	2	2	2	2	2	2								2	2	2
9	18	2020-05-15	2020-05-02	17.1667	18	51	1	67.836		2	1	3	2	172	76	25.6896	2	2	2	2	1	2	2	2	2	2	2	2	2	2	2	2	2	2	2	2	2	2	2								2	2	2
9	1	2020-05-01	2020-05-05		5	35	1	61.466		2	1	3	2	165	70	25.7117	2	2	2	2	1	2	2	2	2	2	2	2	2	2	2	2	2	2	2	2	2	2	2								2	2	2
9	5	2020-05-04	2020-05-04	1.375	4		1	65.106		2	2		2	169	60	21.0077	2	2	2	2	2	2	2	2	2	2	2	2	2	2	2	2	2	2	2	2	2	2	2								2	2	2
9	4	2020-05-05	2020-05-05		4	31	2	54.236	2	1			2	162	75	28.578	2	2	2	2	1	2	1	1	2	2	2	2	2	2	2	2	2	2	2	2	2	2	2								2	2	2
9	1	2020-05-06	2020-05-05	0.5625	1	51	2	56.966	2	2	1	3	2	165	80	29.3848	2	2	2	2	1	2	2	2	2	2	2	2	2	2	2	2	2	2	2	2	2	2	2								2	2	2
9	2	2020-05-05	2020-05-06		2	44	1	61.466		2	1	3	2	165	72	26.4463	2	2	2	2	1	2	2	2	2	2	1	2	2	2	2	2	2	2	2	2	2	2	2								2	2	2
9	4	2020-05-08	2020-05-08		66	44	1	66.016		2	1	5	2	170	90	31.1419	2	2	2	2	1	1	1	1	2	2	2	2	2	2	2	2	2	2	2	2	2	2	2								2	2	2
9	6	2020-05-11	2020-05-09	4.125	7	58	1	66.016		2	1	5	2	170	100	34.6021	2	2	2	2	1	2	2	2	2	2	2	2	2	2	2	2	2	2	2	2	2	2	2								2	2	2
9	14	2020-05-11	2020-05-10	11.7083	15	53	1	52.366		2	1	1	2	155	65	27.0552	2	2	2	2	1	2	1	2	2	2	2	2	2	2	2	2	2	2	2	2	2	2	2								2	2	2
9	39	2020-05-11	2020-05-10	14.6021	44	66	1	72.386		1			2	177	80	25.5354	9999	9999	9999	9999	9999	9999	1	1	1	2	9999	9999	9999	9999	9999	1	1	2	9999	9999	2	9999	9999
9	5	2020-05-11	2020-05-11		5	69	1			2	1	5	2				2	2	2	2	2	1	2	2	2	2	2	2	2	2	2	2	2	2	2	2	2	2	2
9	5	2020-05-11	2020-05-12	4.0625	6	55	1	55.096		2	1	3	2	158	54	21.6311	2	2	2	2	9999	2	2	2	2	2	2	2	2	2	2	2	2	2	2	2	2	2	2								2	2	2
9	10	2020-05-11	2020-05-12	6.375	11	65	1	66.926		2	1	5	2	171	85	29.0688	9999	9999		9999	9999	2	2	2	2	2	2	2	1	2	2	2	2	2	2	2	2	2	2								2	2	2
9	6	2020-05-13	2020-05-13	5.5	6	58	1	70.566		1			2	175	62	20.2449	2	2	2	2	9999	2	1	1	2	2	2	2	2	2	2	2	2	2	2	2	2	2	2								2	2	2
9	6	2020-05-14	2020-05-14	5.45833	6	59	1			2	1	3	2				2	2	2	2	9999	2	2	2	2	2	2	2	2	2	2	2	2	2	2	2	2	2	2								2	2	2
9	4	2020-05-14	2020-04-14		4	44	1			2	1	3	2		60		2	1	2	2	2	1	1	1	1	1	2	2	2	2	2	2	2	2	2	2	2	2	2								1	2	1
9	5	2020-05-11	2020-05-12	4.0625	5	55	1	55.096		2	1	3	2	158	54	21.6311	2	2	2	2	9999	2	2	2	2	2	2	2	2	2	2	2	2	2	2	2	2	2	2								2	2	2
9	6	2020-05-13	2020-05-13	5.5	6	58	1	67.836		1			2	172	65	21.9713	2	2	2	2	9999	2	1	1	2	2	2	2	2	2	2	2	2	2	2	2	2	2	2								2	2	2
9	6	2020-05-14	2020-05-14	5.45833	6	59	1			2	1	3	2				2	2	2	2	9999	2	2	2	2	2	2	2	2	2	2	2	2	2	2	2	2	2	2								2	2	2
9	1	2020-05-13	2020-05-16	2.54167	4	31	1			2	1	2	2		100		2	2	2	2	9999	2	2	2	2	2	2	2	2	2	2	2	2	2	2	2	2	2	2								2	2	2
9	6	2020-05-16	2020-05-15	3.5	15	75	1			1			2		75		2	2	2	2	9999	2	2	2	2	2	2	2	2	2	2	2	2	2	2	2	2	2	2								9999	9999	9999
9	18	2020-05-13	2020-05-16	11.5833	22	57	1			2	1	3	2				2	2	2	2	9999	2	2	2	2	2	2	2	2	2	2	2	2	2	2	2	2	2	2								2	2	2
9	6	2020-05-15	2020-05-17	7.5	8	36	1			2	1	3	2				2	2	2	2	9999	2	2	2	2	2	2	2	2	2	2	2	2	2	2	2	2	2	2								2	2	2
9	19	2020-05-14	2020-05-18	22.125	23	47	1	69.656		2	1	2	2	174	90	29.7265	2	2	2	2	9999	2	2	2	2	2	2	2	2	2	2	2	2	2	2	2	2	2	2								2	2	2
9	1	2020-05-16	2020-05-19	39.5	9	46	1	56.916		2	1	9	2	160	130	50.7812	2	2	2	2	2	2	2	1	2	2	2	2	2	2	2	2	2	2	2	2	2	2	2								9999	9999	9999
9	6	2020-05-17	2020-05-19	5.70833	8	46	1	61.466		2	1	3	2	165	85	31.2213	2	2	2	2	2	2	2	2	2	2	2	2	1	2	2	2	2	2	2	2	2	2	2								2	2	2
9	2	2020-05-14	2020-05-21		2	41	1			2	1	5	2		60		2	2	2	2	2	2	1	2	2	2	2	2	2	2	2	2	2	2	2	2	2	2	2								2	2	2
9	3	2020-05-18	2020-05-22		8	56	2	48.776	2	2	1	5	2	156	80	32.8731	2	2	2	2	2	2	2	1	2	2	2	2	2	2	2	2	2	2	2	2	2	2	2								2	2	2
9	11	2020-05-21	2020-05-24	10.7917	14	54	2	46.956	2	2	1	7	2	154	55	23.1911	2	2	2	2	2	2	2	2	2	2	2	2	2	2	2	2	2	2	2	2	2	2	2								2	2	2
9	11	2020-05-21	2020-05-24	10.125	14	70	2	52.416	2	2	1	5	2	160	70	27.3438	9999	9999	9999	9999	9999	2	2	2	2	2	2	2	2	2	2	2	2	2	2	2	2	2	2								2	2	2
9	13	2020-05-23	2020-05-26	15.125	16	76	1	66.016		2	1	8	2	170	95	32.872	9999	9999	9999	9999	9999	2	2	2	1	2	2	2	2	2	2	2	2	2	2	2	2	2	2								2	2	2
9	16	2020-05-27	2020-05-27	9.5	16	27	1			1			2		85		9999	9999	9999	9999	9999	2	1	2	2	2	2	2	2	2	2	2	2	2	2	2	2	2	2								2	2	2
9	4	2020-04-13	2020-04-14		5	43	1			2	1	3	2		65		2	2	2	2	2	2	1	1	2	2	2	2	2	2	2	2	2	2	2	2	2	2	2								2	2	2
9	3	2020-05-30	2020-05-28		11	57	1			2	1	6	2		70		9999	9999	9999	9999	9999	1	1	1	2	2	2	2	2	2	2	2	2	2	2	2	2	2	2								1	2	2
9	9	2020-05-26	2020-05-28	8.16667	12	70	1	64.196		2	1	5	2	168	70	24.8016	9999	9999	9999	9999	9999	2	1	1	2	2	2	2	1	2	2	2	2	2	2	2	2	2	2								2	2	2
9	7	2020-05-29	2020-05-28	5.75	7	41	1			2	1	3	1		75		9999	9999	9999	9999	9999	2	2	2	2	2	2	2	2	2	2	2	2	2	2	2	2	2	2								2	2	2
9	10	2020-05-27	2020-05-29		13	29	2		2	2	1	5	2				9999	9999	9999	9999	9999	2	2	2	2	2	2	2	2	2	2	2	2	2	2	2	2	2	2								2	2	2
9	6	2020-05-29	2020-05-29	6.54167	7	41	2	60.606	2	2	1	5	2	169	74	25.9095	9999	9999	9999	9999	9999	2	1	2	2	2	2	2	2	2	2	2	2	2	2	2	2	2	2								2	2	2
9	18	2020-05-26	2020-05-29		18	41	1	64.196		2	1	9	2	168	75	26.5731	2	2	2	2	2	2	2	2	2	2	2	2	2	2	2	2	2	2	2	2	2	2	2								2	2	2
9	5	2020-05-28	2020-05-26	-0.690972	5	54	1	58.736		2	1	2	2	162	59.2	22.5575	2	2	2	2	2	2	1	2	2	2	2	2	2	2	2	2	2	2	2	2	2	2	2								2	2	2
9	14	2020-05-26	2020-05-29	13.1667	14	60	1	63.286		2	1	5	2	167	66	23.6652	2	2	2	2	2	2	1	2	2	2	2	2	2	2	2	2	2	2	2	2	2	2	2								2	2	2
9	12	2020-06-27	2020-06-26	10.6049	12	38	1	52.366		2	1	3	2	155	70	29.1363	9999	9999	9999	9999	9999	2	1	2	2	2	2	2	2	2	2	2	2	2	2	2	2	2	2								2	2	2
9	10	2020-05-25	2020-05-25		22	55	1			2	1	2	1		90		9999	9999	9999	9999	9999	1	2	1	2	2	2	2	2	2	2	2	2	2	2	2	2	2	2								2	2	2
9	6	2020-05-28	2020-05-28	4.04167	6	24	1	58.736		2	1	3	2	162			9999	9999	9999	9999	9999	2	2	2	2	2	2	2	2	2	2	1	1	2	2	2	2	2	2								2	2	2
9	56	2020-06-26	2020-06-29	28.5	56	31	1			2	1	11	2		80		2	2	2	2	2	9999	9999	9999	9999	9999	9999	9999	9999	9999	9999	9999	9999	9999	9999	9999	9999	9999	9999								9999	9999	9999
9	3	2020-05-29	2020-05-29		3	78	2		2	1			2		45		9999	9999	9999	9999	9999	2	2	2	2	2	2	2	2	2	2	2	2	2	2	2	2	2	2								2	2	2
9	17	2020-05-29	2020-05-29		28	54	1			2	1	3	2		80		2	2	2	2	2	2	1	2	2	2	2	2	2	2	2	2	2	2	2	2	2	2	2								2	2	2
9	13	2020-05-28	2020-05-28		19	28	2		2	2	1	7	2				9999	9999	9999	9999	9999	2	2	2	2	2	2	2	1	2	2	2	2	2	2	2	2	2	2								2	2	2
9	3	2020-05-22	2020-06-01	3.52083	3	55	1			2	1	1	2		80		9999	9999	9999	9999	9999	2	1	1	2	2	2	2	2	2	2	1	2	2	2	2	2	2	2								2	2	2
9	3	2020-06-01	2020-06-01	3.70903	3	59	1	72.386		2	1	10	2	177	80	25.5354	9999	9999	9999	9999	9999	2	2	1	2	2	2	2	2	2	2	2	2	2	2	2	2	2	2								2	2	2
9	2	2020-05-30	2020-06-01	3.16667	4	61	1			2	1	2	2		80		2	2	2	2	2	2	2	2	2	2	2	2	2	2	2	2	2	2	2	2	2	2	2								2	2	2
9	2	2020-05-30	2020-05-31	0.833333	3	54	1			2	1	3	2				9999	9999	9999	9999	9999	2	1	1	2	2	2	2	2	2	2	2	2	2	2	1	2	2	2								2	2	2
9	5	2020-05-31	2020-06-01	4.875	5		1								78		2	2	2	2	2	2	2	2	2	2	2	2	2	2	2	2	2	2	2	2	2	2	2								2	2	2
9	4	2020-06-01	2020-06-03	3.54167	6	44	1			2	1	2	2		83		2	2	2	2	2	2	1	2	2	2	2	2	2	2	2	2	2	2	2	2	2	2	2								2	2	2
9	23	2020-06-07	2020-06-03	23.5	24	38	1			2	1	2	2		95		9999	9999	9999	9999	9999	9999	9999	9999	9999	9999	9999	9999	9999	9999	9999	9999	9999	9999	9999	9999	9999	9999	9999								9999	9999	9999
9	10	2020-06-03	2020-06-04	8.5	11	32	1	64.196		2	1	2	2	168	90	31.8878	2	2	2	2	2	9999	9999	1	9999	9999	9999	9999	9999	9999	9999	9999	9999	9999	9999	9999	9999	9999	9999								9999	9999	9999
9	3	2020-06-02	2020-06-04	2.375	5	59	1			2	1	5	2		80		2	2	2	2	2	2	1	1	2	2	2	2	2	2	2	2	2	2	2	2	2	2	2								2	2	2
9	3	2020-06-01	2020-06-04	4.16667	3	43	1	56.916		2	1	2	2	160	90	35.1562	9999	9999	9999	9999	9999	2	2	2	2	2	2	2	2	2	2	2	2	2	2	2	2	2	2								2	2	2
9	2	2020-06-02	2020-06-05	1.33333	9	81	1	66.016		2	1	5	2	170	60	20.7612	2	2	2	2	2	2	2	2	2	2	2	2	2	2	2	2	2	2	2	2	2	2	2								2	2	2
9	21	2020-06-04	2020-06-05	20.5	23	49	1	71.476		2	1	23	2	176	111	35.8342	2	2	2	2	2	9999	9999	9999	9999	9999	9999	9999	9999	9999	9999	9999	9999	9999	9999	9999	9999	9999	9999								9999	9999	9999
9	1	2020-06-04	2020-06-06	0.5	2	45	2	42.406	2	2	1	21	2	149	65	29.278	9999	9999	9999	9999	9999	2	2	2	2	2	2	2	2	2	2	2	2	2	2	2	2	2	2								2	2	2
9	8	2020-06-07	2020-06-07		8	70	1			2	1	5	2		70		2	2	2	2	2	2	1	2	2	2	2	2	2	2	2	2	2	2	2	2	2	2	2								2	2	2
9	20	2020-06-08	2020-06-06	18.5	20	76	1			2	1	9	2		80		9999	9999	9999	9999	9999	2	2	2	2	2	2	2	2	2	2	2	2	2	2	2	2	2	2								9999	9999	9999
9	7	2020-06-09	2020-06-08	4.48958	8	58	2		2	1			2		80		2	2	2	2	2	2	2	2	2	2	2	2	2	2	2	2	2	2	2	2	2	2	2								2	2	2
9	40	2020-06-06	2020-06-08	40	42	28	2	56.966	2	2	1	3	2	165	73	26.8136	2	2	2	2	2	2	2	2	2	2	2	2	2	2	2	2	2	2	2	2	2	2	2								2	2	2
9	16	2020-06-09	2020-06-09	18.125	19	39	1	64.196		2	1	3	2	168	86	30.4705	2	2	2	2	2	2	1	2	2	2	2	2	2	2	2	2	2	2	2	2	2	2	2								9999	9999	9999
9	12	2020-06-14	2020-06-16	6	14	37	1			2	1	2	2		80		2	2	2	2	2	2	2	2	2	2	2	2	2	2	2	2	2	2	2	2	2	2	2								2	2	2
9	8	2020-06-03	2020-06-16		13	48	1			1			2		80		2	1	2	2	2	2	2	2	2	2	2	2	2	2	2	2	2	2	2	2	2	2	2								9999	9999	9999
9	7	2020-06-08	2020-06-17		10	38	2	43.316	2	2	1	7	2	150	65	28.8889	2	1	2	2	2	2	2	2	2	2	2	2	2	2	2	2	2	2	2	2	2	2	2								9999	9999	9999
9	2	2020-06-12	2020-06-12		2	68	1			2	1	6	2		68		2	2	2	2	2	2	1	1	2	2	2	2	2	2	2	2	2	2	2	2	2	2	2								2	2	2
9	23	2020-06-14	2020-06-14		23	93	1			2	1	11	2		80		9999	9999	9999	9999	9999	2	2	1	1	2	2	2	2	2	2	2	2	2	2	2	2	2	2								2	2	2
9	8	2020-06-06	2020-06-06		8	29	2	56.056	2	2	1	9	2	164	80	29.7442	9999	9999	9999	9999	9999	2	2	2	2	2	2	2	2	2	2	2	2	2	2	2	2	2	2								2	2	2
9	14	2020-06-19	2020-06-18	13.25	13	81	2	52.416	2	2	1	19	2	160	96	37.5	2	2	2	2	2	2	1	1	2	2	2	2	2	2	2	2	2	2	2	2	2	2	2								2	2	2
9	9	2020-06-16	2020-06-15	3.41667	9	52	1	67.836		1			2	172	86	29.0698	2	2	2	2	2	2	1	1	2	2	2	2	2	2	2	2	2	2	2	2	2	2	2								9999	9999	9999
9	13	2020-06-05	2020-06-06		23	31	1	64.196		2	1	3	2	168	70	24.8016	9999	9999	9999	9999	9999	2	2	2	2	2	2	2	2	2	2	2	2	2	2	2	2	2	2								2	2	2
9	8	2020-06-07	2020-06-06	8.5	9	54	1			2	1	3	2		80		9999	9999	9999	9999	9999	9999	9999	9999	9999	9999	9999	9999	9999	9999	9999	9999	9999	9999	9999	9999	9999	9999	9999								9999	9999	9999
9	15	2020-06-02	2020-06-02	9.5	15	67	1			2	1	2	2		90		9999	9999	9999	9999	9999	9999	9999	9999	9999	9999	9999	9999	9999	9999	9999	9999	9999	9999	9999	9999	9999	9999	9999								9999	9999	9999
9	11	2020-06-10	2020-06-04		14	42	2	50.596	2	1			2	158	80	32.0461	9999	9999	9999	9999	9999	2	2	1	2	2	2	2	2	2	2	2	2	2	2	2	2	2	2								2	2	2
9	14	2020-06-03	2020-06-04	14.9444	16	74	2		2	2	1	5	2		75		2	2	2	2	9999	2	1	1	2	2	2	2	1	2	2	2	2	2	2	2	2	2	2								9999	9999	9999
9	13	2020-06-04	2020-06-04	9.5625	15	58	1			2	1	3	2		68		9999	9999	9999	9999	9999	2	1	1	2	2	2	2	1	2	2	2	2	2	2	2	2	2	2								2	2	2
9	11	2020-06-04	2020-06-04	6.83333	19	42	1	64.196		2	1	3	2	168	80	28.3447	2	2	2	2	2	2	1	2	2	2	2	2	2	2	2	2	2	2	2	2	2	2	2								2	2	2
9	12	2020-06-03	2020-06-04	10.5382	12	47	1			2	1	1	1		75		2	2	2	2	2	9999	9999	9999	9999	9999	9999	9999	9999	9999	9999	9999	9999	9999	9999	9999	9999	9999	9999								9999	9999	9999
9	11	2020-06-05	2020-06-05	10.6042	13	44	1	67.836		2	1	2	2	172	90	30.4218	9999	9999	9999	9999	9999	2	2	2	2	2	2	2	2	2	2	2	2	2	2	2	2	2	2								2	2	2
9	15	2020-06-04	2020-06-03	14.5	15	44	1			2	1	1	1		65		2	2	2	2	2	9999	9999	9999	9999	9999	9999	9999	9999	9999	9999	9999	9999	9999	9999	9999	9999	9999	9999								9999	9999	9999
9	8	2020-06-06	2020-06-06	8.625	9	20	1			1			2		55		2	2	2	2	2	2	2	2	2	2	2	2	2	2	2	2	2	2	2	2	2	2	2								9999	9999	9999
9	4	2020-06-02	2020-06-06		16	47	1	64.196		2	1	2	2	168	90	31.8878	9999	9999	9999	9999	9999	2	2	2	2	2	2	2	2	2	2	2	2	2	2	2	2	2	2								2	2	2
9	7	2020-05-31	2020-06-05		24	40	1			2	1	5	2		73		9999	9999	9999	9999	9999	9999	9999	9999	9999	9999	9999	9999	9999	9999	9999	9999	9999	9999	9999	9999	9999	9999	9999								9999	9999	9999
9	37	2020-06-04	2020-06-05		45	30	1			2	1	9	2		85		9999	9999	9999	9999	9999	2	1	2	2	2	2	2	2	2	2	2	2	2	2	2	2	2	2								9999	9999	9999
9	14	2020-05-28	2020-06-05	14.4792	17	47	1	63.286		2	1	23	2	167	75	26.8923	2	2	2	2	2	2	2	2	2	2	2	2	2	2	2	2	2	2	2	2	2	2	2								9999	9999	9999
9	4	2020-06-06	2020-06-06		8	29	2	56.056	2	2	1	9	2	164	80	29.7442	2	2	2	2	2	2	2	2	2	2	2	2	2	2	2	2	2	2	2	2	2	2	2								2	2	2
9	13	2020-06-06	2020-06-06		30	31	1	64.196		2	1	3	2	168	70	24.8016	9999	9999	9999	9999	9999	2	2	2	2	2	2	2	2	2	2	2	2	2	2	2	2	2	2								2	2	2
9	8	2020-06-07	2020-06-06	8.5	9	54	1			2	1	3	2		80		9999	9999	9999	9999	9999	9999	9999	9999	9999	9999	9999	9999	9999	9999	9999	9999	9999	9999	9999	9999	9999	9999	9999								9999	9999	9999
9	12	2020-06-04	2020-06-06		20	29	1	69.656		2	1	2	2	174	85	28.075	9999	9999	9999	9999	9999	9999	9999	9999	9999	9999	9999	9999	9999	9999	9999	9999	9999	9999	9999	9999	9999	9999	9999								9999	9999	9999
9	10	2020-06-06	2020-06-06	8.5	10	27	2	50.596	1	1			2	158	113	45.2652	9999	9999	9999	9999	9999	2	2	2	2	2	2	2	1	2	2	2	2	2	2	2	2	2	2								9999	9999	9999
9	13	2020-06-06	2020-06-06	11.4167	14	47	1	71.476		2	1	2	2	176	90	29.0548	2	2	2	2	2	2	2	2	2	2	2	2	2	2	2	2	2	2	2	2	2	2	2								2	2	2
9	11	2020-06-10	2020-06-05	8.75	11	65	1			2	1	7	2		75		9999	9999	9999	9999	9999	9999	9999	9999	9999	9999	9999	9999	9999	9999	9999	9999	9999	9999	9999	9999	9999	9999	9999								9999	9999	9999
9	7	2020-06-08	2020-06-08	6.16667	10	52	1	66.016		2	1	1	2	170	80	27.6817	9999	9999	9999	9999	9999	9999	9999	9999	9999	9999	9999	9999	9999	9999	9999	9999	9999	9999	9999	9999	9999	9999	9999								9999	9999	9999
9	8	2020-06-08	2020-06-08	7.94444	9	47	1			2	1	3	2		80		9999	9999	9999	9999	9999	9999	9999	9999	9999	9999	9999	9999	9999	9999	9999	9999	9999	9999	9999	9999	9999	9999	9999								9999	9999	9999
9	11	2020-06-07	2020-06-08		16	27	1	67.836		2	1	9	2	172	95	32.112	9999	9999	9999	9999	9999	2	2	2	2	2	2	2	2	2	2	2	2	2	2	2	2	2	2								2	2	2
9	8	2020-05-31	2020-06-09		17	23	2	52.416	2	1			2	160	77.5	30.2734	2	2	2	2	2	2	1	2	2	2	2	2	2	2	2	2	2	2	2	2	2	2	2								2	2	2
9	22	2020-06-10	2020-06-10	25.125	12	61	1			2	1	2	2				9999	9999	9999	9999	9999	2	1	2	2	2	2	2	2	2	2	2	2	2	2	2	2	2	2								9999	9999	9999
9	13	2020-06-04	2020-06-10		19	37	1	58.736		2	1	7	2	162	75	28.578	2	2	2	2	2	2	2	2	2	2	2	2	2	2	2	2	2	2	2	2	2	2	2								2	2	2
9	6	2020-06-14	2020-06-11	5.79861	18	34	1	66.016		2	1	9	2	170	80	27.6817	9999	9999	9999	9999	9999	2	1	2	2	2	2	2	2	2	2	2	2	2	2	2	2	2	2								9999	9999	9999
9	12	2020-06-16	2020-06-11		21	49	1	67.836		2	1	2	2	172	85	28.7317	2	2	2	2	2	2	2	2	2	2	2	2	2	2	2	2	2	2	2	2	2	2	2								9999	9999	9999
9	14	2020-06-11	2020-06-12	7.91667	18	49	1	70.566		2	1	3	2	175	70	22.8571	2	2	2	2	2	2	1	1	2	2	2	2	2	2	2	2	2	2	2	2	2	2	2								9999	9999	9999
9	12	2020-06-12	2020-06-12	9.29167	20	32	1	70.566		2	1	2	2	175	75	24.4898	2	2	2	2	2	2	2	2	2	2	2	2	2	2	2	2	2	2	2	2	2	2	2								9999	9999	9999
9	9	2020-06-13	2020-07-03	9	30	67	1	73.296		2	1	6	2	178	76	23.9869	2	2	2	2	2	2	1	1	2	2	2	2	2	2	2	2	2	2	2	2	2	2	2								2	2	2
9	4	2020-06-14	2020-06-13		13	58	1			2	1	2	2		70		9999	9999	9999	9999	9999	2	2	1	2	2	2	2	2	2	2	2	2	2	2	2	2	2	2								9999	9999	9999
9	27	2020-06-10	2020-06-06		33	53	1			2	1	3	2				9999	9999	9999	9999	9999	2	1	1	2	2	2	2	2	2	2	2	2	2	2	2	2	2	2								2	2	2
9	14	2020-06-16	2020-06-16	13.5	17	62	1	57.826		1			2	161	64	24.6904	9999	9999	9999	9999	9999	2	1	1	2	2	2	2	2	2	2	2	2	2	2	2	2	2	2								2	2	2
9	15	2020-06-15	2020-06-17		24	47	1			2	1	1	1		70		2	2	2	2	2	2	1	2	2	2	2	2	2	2	2	2	2	2	2	2	2	2	2								9999	9999	9999
9	6	2020-06-13	2020-06-17		22	57	1	70.566		2	1	2	2	175	85	27.7551	2	2	2	2	2	2	1	2	2	2	2	2	2	2	2	2	2	2	2	2	2	2	2								9999	9999	9999
9	51	2020-06-16	2020-06-17		30	49	1			2	1	3	2		85		9999	9999	9999	9999	9999	2	2	1	2	2	2	2	2	2	2	2	2	2	2	2	2	2	2								2	2	2
9	11	2020-06-16	2020-06-18		22	59	1			2	1	23	2		70		2	2	2	2	2	2	1	2	2	2	2	2	2	2	2	2	2	2	2	2	2	2	2								9999	9999	9999
9	13	2020-06-04	2020-06-06		20	29	1	69.656		2	1	2	2	174	85	28.075	9999	9999	9999	9999	9999	9999	9999	9999	9999	9999	9999	9999	9999	9999	9999	9999	9999	9999	9999	9999	9999	9999	9999								9999	9999	9999
9	10	2020-06-20	2020-06-19	9.14097	10	50	1	68.746		2	1	1	2	173	75	25.0593	2	2	2	2	2	2	2	2	2	2	2	2	2	2	2	2	2	2	2	2	2	2	2								2	2	2
9	13	2020-06-19	2020-06-19	13.25	14	81	2	52.416	2	2		19	2	160	90	35.1562	2	2	2	2	2	2	1	1	2	2	2	2	2	2	2	2	2	2	2	2	2	2	2								2	2	2
9	15	2020-06-18	2020-06-19	14.2812	16	30	1			2	1	1	2		64		2	2	2	2	2	2	1	1	2	2	2	2	2	2	2	2	2	2	2	2	2	2	2								2	2	2
9	6	2020-06-17	2020-06-19		12	45	1			2	1	2	2				2	2	2	2	2	2	2	1	2	2	2	2	2	2	2	2	2	2	2	2	2	2	2								9999	9999	9999
9	7	2020-06-19	2020-06-19		13	45	1	75.116		2	1	3	2	180	60	18.5185	2	2	2	2	2	2	1	2	2	2	2	2	2	2	2	2	2	2	2	2	2	2	2								9999	9999	9999
9	8	2020-06-20	2020-06-20	7.70833	9	55	1	66.016		2	1	2	2	170	80	27.6817	2	2	2	2	2	2	2	1	2	2	2	2	2	2	2	2	2	2	2	2	2	2	2								2	2	2
9	22	2020-06-20	2020-06-20	22	22	38	1	56.916		2	1	5	2	160	100	39.0625	2	2	2	2	2	2	1	1	2	2	2	2	2	2	2	2	2	2	2	2	2	2	2								2	2	2
9	15	2020-06-18	2020-06-19		24	67	1	56.916		2	1	6	2	160	85	33.2031	9999	9999	9999	9999	9999	2	1	2	2	2	2	2	2	2	2	2	2	2	2	2	2	2	2								2	2	2
9	14	2020-06-18	2020-06-20	6.5	15	55	2		2	1			2		90		2	2	2	2	2	2	1	1	2	2	2	2	2	2	2	2	2	2	2	2	2	2	2								2	2	2
9	12	2020-06-19	2020-06-20	11.5833	14	45	1	66.016		2	1	3	2	170	85	29.4118	2	2	2	2	2	2	2	2	2	2	2	2	2	2	2	2	2	2	2	2	2	2	2								2	2	2
9	4	2020-06-18	2020-06-20		12	43	1			2	1	11	2				2	2	2	2	2	2	2	2	2	2	2	2	2	2	2	2	2	2	2	2	2	2	2								9999	9999	9999
9	15	2020-06-21	2020-06-20	15	15	69	1			2	1	2	2		65		2	2	2	2	2	1	1	2	2	2	2	2	2	2	2	2	2	2	2	2	2	2	2								2	2	2
9	9	2020-06-19	2020-06-19		12	39	1			2	1	2	2				2	1	2	2	2	2	2	2	2	2	2	2	2	2	2	2	2	2	2	2	2	2	2								9999	9999	9999
9	9	2020-06-20	2020-06-21		16	40	1	65.106		2	1	2	2	169	100	35.0128	2	2	2	2	2	2	2	2	2	2	2	2	2	2	2	2	2	2	2	2	2	2	2								9999	9999	9999
9	15	2020-06-19	2020-06-21	4.5	18	83	1	58.736		1			2	162	60	22.8624	9999	9999	9999	9999	9999	2	2	2	2	2	2	2	2	2	2	2	2	2	2	2	2	2	2								2	2	2
9	12	2020-06-22	2020-06-21		18	52	1			2	1	10	2				2	2	2	2	2	2	1	2	2	2	2	2	2	2	2	2	2	2	2	2	2	2	2								2	2	2
9	17	2020-06-19	2020-06-22		22	36	1			2	1	2	2		60		2	2	2	2	2	2	2	2	2	2	2	2	2	2	2	2	2	2	2	2	2	2	2								2	2	2
9	16	2020-06-21	2020-06-21	8.5	36	62	1	62.376		2	1	3	2	166	90	32.6608	2	2	2	2	2	2	1	2	2	2	2	2	1	2	2	2	2	2	2	2	2	2	2								2	2	2
9	13	2020-06-22	2020-06-22		22	46	1			2	1	7	2		75		2	2	2	2	2	2	2	2	2	2	2	2	2	2	2	2	2	2	2	2	2	2	2								2	2	2
9	32	2020-06-20	2020-06-24		34	51	1	70.566		2	1	3	2	175	90	29.3878	2	2	2	2	2	2	1	2	2	2	2	2	2	2	2	2	2	2	2	2	2	2	2								2	2	2
9	15	2020-06-24	2020-06-24	15.5	16	50	1	65.106		2	1	17	2	169	85	29.7609	9999	9999	9999	9999	9999	2	1	1	2	2	2	2	2	2	2	2	2	2	2	2	2	2	2								2	2	2
9	14	2020-06-24	2020-06-24	8.5	14	44	1	47.816		2	1	3	2	150	54	24	9999	9999	9999	9999	9999	2	2	1	2	2	2	2	2	2	2	2	2	2	2	2	2	2	2								2	2	2
9	16	2020-06-23	2020-06-23		24	63	1	56.916		2	1	7	2	160	63	24.6094	2	2	2	2	2	2	2	2	2	2	2	2	2	2	2	2	2	2	2	2	2	2	2								2	2	2
9	8	2020-06-24	2020-06-24	7.5	8	75	2	56.966	2	2	1	5	2	165	80	29.3848	2	2	2	2	2	2	1	1	2	2	2	2	2	2	2	2	2	2	2	2	2	2	2								2	2	2
9	17	2020-06-25	2020-06-25	12.5	19	75	2	48.776	2	2	1	10	2	156	80	32.8731	2	1	2	2	2	2	2	1	2	2	2	2	2	2	2	2	2	2	2	2	2	2	2								2	2	2
9	11	2020-06-25	2020-06-25	9.5	11	57	1	59.646		2	1	2	1	163	80	30.1103	2	2	2	2	2	2	2	2	2	2	2	2	2	2	2	2	2	2	2	2	2	2	2								2	2	2
9	12	2020-06-24	2020-06-27		15	37	1			2	1	3	1				2	2	2	2	2	2	2	2	2	2	2	2	2	2	2	2	2	2	2	2	2	2	2								2	2	2
9	20	2020-06-21	2020-06-21	12.5	20	45	1	75.116		2	1	5	2	180	85	26.2346	9999	9999	9999	9999	9999	2	1	1	2	2	2	2	2	2	2	2	2	2	2	2	2	2	2								2	2	2
9	6	2020-06-24	2020-06-28		20	38	2		2	1			2		114		2	2	2	2	2	2	1	2	2	2	2	2	1	2	2	2	2	2	2	2	2	2	2								2	2	2
9	17	2020-06-29	2020-06-28	19.5	20	44	1	77.846		2	1	2	2	183	100	29.8606	9999	9999	9999	9999	9999	2	2	2	2	2	2	2	2	2	2	2	2	2	2	2	2	2	2								2	2	2
9	5	2020-06-27	2020-06-25		13	57	1			2	1	1	2		70		9999	9999	9999	9999	9999	2	1	1	1	2	2	2	2	2	2	2	2	2	2	2	2	2	2								2	2	2
9	9	2020-06-21	2020-06-28		30	77	1	68.746		1			2	173	69.3	23.1548	2	2	2	2	2	2	1	1	2	2	2	2	2	2	2	2	2	2	2	2	2	2	2								2	2	2
9	12	2020-06-29	2020-06-29	11.2917	15	54	1			2	1	1	2				2	2	2	2	2	2	2	2	2	2	2	2	2	2	2	2	2	2	2	2	2	2	2								2	2	2
9	11	2020-06-29	2020-06-29		17	49	1			2	1	3	2		75		2	2	2	2	2	2	1	2	2	2	2	2	2	2	2	2	2	2	2	2	2	2	2								2	2	2
9	10	2020-06-28	2020-06-29		20	51	1			1			2		70		2	2	2	2	2	2	2	2	2	2	2	2	2	2	2	2	2	2	2	2	2	2	2								2	2	2
9	6	2020-06-27	2020-06-29	2.5	8	40	1	81.486		2	1	5	2	187	120	34.3161	2	2	2	2	2	2	2	2	2	2	2	2	2	2	2	2	2	2	2	2	2	2	2								2	2	2
9	11	2020-06-26	2020-06-29		16	54	1	61.466		2	1	7	2	165	70	25.7117	2	2	2	2	2	2	1	1	2	2	2	2	2	2	2	2	2	2	2	2	2	2	2								2	2	2
9	11	2020-06-27	2020-06-29		26	50	1			2	1	2	1				9999	9999	9999	9999	9999	2	1	2	2	2	2	2	2	2	2	2	2	2	2	2	2	2	2								2	2	2
9	10	2020-06-30	2020-06-30	9.5	10	52	1	67.836		2	1	2	2	172	80	27.0416	9999	9999	9999	9999	9999	2	2	2	2	2	2	2	2	2	2	2	2	2	2	2	2	2	2								2	2	2
9	9	2020-06-23	2020-07-01	17.5	17	76	1	66.016		2	1	NIGERIAN	2	170	60	20.7612	9999	9999	9999	9999	9999	2	1	1	2	2	2	2	2	2	2	2	2	2	2	2	2	2	2								9999	9999	9999
9	11	2020-06-30	2020-07-02		13	52	1			2	1	8	2		60		2	2	2	2	2	2	2	1	2	2	2	2	2	2	2	2	2	2	2	2	2	2	2								2	2	2
9	6	2020-06-29	2020-07-04		9	70	1	66.016		2	1	6	2	170	80	27.6817	9999	9999	9999	9999	9999	2	2	2	2	2	2	2	2	2	2	2	2	2	2	2	2	2	2								2	2	2
9	10	2020-07-05	2020-07-06		11	76	1	56.916		2	1	5	2	160	70	27.3438	9999	9999	9999	9999	9999	2	1	1	2	2	2	2	2	2	2	2	2	2	2	2	2	2	2								2	2	2
9	8	2020-07-07	2020-07-07		10	50	1	66.926		2	1	1	1	171	70	23.939	9999	9999	9999	9999	9999	2	2	2	2	2	2	2	2	2	2	2	2	2	2	2	2	2	2								2	2	2
9	20	2020-08-03	2020-08-04		26	48	1	56.916		2	1	1	2	160	85	33.2031	9999	9999	9999	9999	1	1	1	2	2	2	2	2	2	2	2	2	2	2	2	2	2	2	2								2	2	2
9	20	2020-08-06	2020-08-06		25	78	1	55.096		2	1	5	2	158	45	18.026	9999	9999	9999	9999	1	2	1	2	2	2	2	2	2	2	2	2	2	2	2	2	2	2	2								9999	9999	9999
9	20	2020-08-03	2020-08-03		25	60	1	56.916		1			2	160	70	27.3438	9999	9999	9999	9999	1	2	1	1	2	2	2	2	2	2	2	2	2	2	2	2	2	2	2								9999	9999	9999
9	13	2020-08-04	2020-08-05		17	84	1			1			2				9999	9999	9999	9999	1	2	1	2	2	2	2	2	2	2	2	2	2	2	2	2	2	2	2								9999	9999	9999
9	7	2020-08-05	2020-08-06		12	59	1	67.836		2	1	3	2	172	80	27.0416	9999	9999	9999	9999	2	2	1	1	2	2	2	2	2	2	2	2	2	2	2	2	2	2	2								9999	9999	9999
9	2	2020-08-07	2020-08-08		5	54	1	75.116		1			2	180	75	23.1481	9999	9999	9999	9999	1	2	1	1	2	2	2	2	2	2	2	2	2	2	2	2	2	2	2								9999	9999	9999
9	6	2020-08-06	2020-08-06	4.5	6	66	1	65.106		2	1	7	2	169	75	26.2596	9999	9999	9999	9999	1	2	1	2	2	2	2	2	2	2	2	2	2	2	2	2	2	2	2								9999	9999	9999
9	6	2020-08-07	2020-08-07		6	66	1	72.386		2	1	9	2	177	60	19.1516	9999	9999	9999	9999	1	2	1	2	2	2	2	2	2	2	2	2	2	2	2	2	2	2	2								9999	9999	9999
9	8	2020-05-13	2020-05-12	6.58333	9	54	1	51.456		2	1	6	2	154	85	35.8408	9999	9999	9999	9999	1	2	1	1	2	2	2	2	2	2	2	2	2	2	2	2	2	2	2								2	2	2
9	61	2020-06-12	2020-05-16	7.08333	65	66	1	56.916		2	1	9	2	160	95	37.1094	9999	9999	9999	9999	9999	2	2	2	2	2	2	2	2	2	2	2	2	2	2	2	2	2	2								2	2	2
9	14	2020-06-16	2020-06-17	9.76042	38	60	1	61.466		2	1	3	2	165	95	34.8944	9999	9999	9999	9999	1	9999	1	9999	9999	9999	9999	9999	9999	9999	9999	9999	9999	9999	9999	9999	9999	9999	9999								9999	9999	9999
9	10	2020-06-15	2020-06-21	0.625	45	55	1	66.016		2	1	6	2	170	80	27.6817	9999	9999	9999	9999	1	2	2	1	2	2	2	2	2	2	2	1	2	2	2	2	2	2	2								9999	9999	9999
9	6	2020-07-31	2020-07-31		12	37	1	70.566		2	1	5	2	175	80	26.1224	9999	9999	9999	9999	9999	2	2	2	2	2	2	2	2	2	2	2	2	2	2	2	2	2	2								2	2	2
9	23	2020-06-12	2020-06-15	15.5	34	62	1	61.466		2	1	1	2	165	80	29.3848	9999	9999	9999	9999	1	2	2	1	2	2	2	2	2	2	2	2	2	2	2	2	2	2	2								9999	9999	9999
9	28	2020-06-28	2020-06-28		36	45	1	52.366		2	1	1	2	155	70	29.1363	9999	9999	9999	9999	1	2	1	2	2	2	2	2	2	2	2	2	2	2	2	2	2	2	2								2	2	2
9	5	2020-07-19	2020-07-20		6	63	2	52.416	2	1			2	160	70	27.3438	9999	9999	9999	9999	1	2	1	2	2	2	2	2	2	2	2	2	2	2	2	2	2	2	2								9999	9999	9999
9	23	2020-07-19	2020-07-19	19.5	26	24	1	66.016		1			2	170	80	27.6817	9999	9999	9999	9999	1	2	1	2	2	2	2	2	2	2	2	2	2	2	2	2	2	2	2								2	2	2
9	22	2020-05-31	2020-06-01		35	44	1	66.016		2	1	3	2	170	75	25.9516	9999	9999	9999	9999	1	2	1	1	2	2	2	2	2	2	2	2	2	2	2	2	2	2	2								2	2	2
9	15	2020-06-22	2020-06-22	15.5	16	79	1	54.186		1			2	157	55	22.3133	9999	9999	9999	9999	1	2	1	1	2	2	2	2	2	2	2	2	2	2	2	2	2	2	2								2	2	2
16	10	2020-04-16	2020-04-20	11	10	33	1	66.016		2	2	1	2	170	80	27.6817	9999	9999	9999	9999	9999	2	2	2	2	2	2	2	2	2	2	2	2	2	2	2	2	2	9999								9999	9999	9999
16	1	2020-03-17	2020-03-25		15	55	1	67.836		1			2	172	69.1	23.3572	1	9999	9999	9999	9999	9999	2	2	2	2	2	2	2	2	2	2	2	2	2	2	2	2	2								2	2	2
16	5	2020-03-22	2020-03-23	4.21806	5	30	1	70.566		2	1		1	175	84.1	27.4612	2	1	2	2	2	9999	2	2	2	2	2	2	2	2	2	2	2	2	2	2	2	2	2								2	2	2
16	1	2020-03-23	2020-03-27		6	46	1	66.016		2	1		2	170	70.5	24.3945	2	9999	1	2	2	9999	2	2	2	2	2	2	2	2	2	2	2	2	2	2	2	2	2								2	2	2
16	3	2020-03-28	2020-04-01	32.8625	3	51	1	64.196		2	1		2	168	90	31.8878	2	2	9999	2	1	2	1	2	2	2	2	2	2	2	2	2	2	2	2	2	2	2	2								2	2	2
16	3	2020-05-13	2020-05-19	5.5	3	49	1	66.016		2	1		2	170	93.8	32.4567	9999	9999	9999	9999	9999	9999	9999	9999	9999	9999	9999	9999	9999	9999	9999	9999	9999	9999	9999	9999	9999	9999	9999								9999	9999	9999
16	17	2020-05-06	2020-05-09	17.9861	17	44	1	66.016		1			2	170	103.5	35.8131	9999	9999	9999	9999	9999	9999	1	2	2	2	2	2	2	2	2	2	2	2	2	2	2	2	2								2	2	2
16	7	2020-05-16	2020-05-19	19.5	7	59	1	61.466		2	1		2	165	89.7	32.9477	9999	9999	9999	9999	9999	9999	1	1	9999	9999	9999	9999	9999	9999	9999	9999	9999	9999	9999	9999	2	9999	9999								9999	9999	9999
16	1	2020-03-17	2020-03-25		15	55	1	67.836		1			2	172	69.1	23.3572	1	2	9999	2	2	2	2	2	2	2	2	2	2	2	2	2	2	2	2	2	2	2	2								2	2	2
16	1	2020-04-01	2020-04-04		16	65	1	66.016		1			2	170	121	41.8685	2	2	1	9999	2	9999	2	1	2	2	2	2	2	2	2	2	2	2	2	2	2	2	2								2	2	2
16	5	2020-04-03	2020-04-06		12	58	2	68.796	2	2	1		2	178	89	28.0899	2	9999	9999	2	1	2	2	2	2	2	2	2	2	2	2	2	2	2	2	2	2	2	2								2	2	2
16	2	2020-03-26	2020-03-30		12	38	1			2	1		2				1	2	1	2	1	2	2	2	2	2	2	2	2	2	2	2	2	2	2	2	2	2	2								2	2	2
16	4	2020-04-04	2020-04-06		11	52	1	61.466		2	1		2	165	71.7	26.3361	2	9999	9999	2	1	2	1	1	2	2	2	2	2	2	2	2	2	2	2	2	2	2	2								2	2	2
16	3	2020-03-28	2020-04-01	2.5	3	51	1	64.196		2	1		2	168	90	31.8878	2	9999	9999	2	1	2	1	2	2	2	2	2	2	2	2	2	2	2	2	2	2	2	2								2	2	2
16	17	2020-05-10	2020-05-09	16.5882	17	52	1	56.916		2	1		2	160	85	33.2031	2	2	1	2	1	2	2	2	2	2	2	2	2	2	2	2	2	2	2	2	2	2	2								9999	9999	9999
16	5	2020-05-12	2020-05-25	7.5	5	40	1	66.016		1			2	170	104	35.9862	9999	9999	9999	9999	9999	9999	2	2	2	2	2	2	2	2	2	2	2	2	2	2	2	2	2								2	2	2
16	22	2020-05-01	2020-05-10	21.3542	23	56	1	58.736		2	1		2	162	74.5	28.3874	2	9999	9999	2	1	9999	1	1	2	2	2	2	2	2	2	2	2	2	2	2	2	2	2								2	2	2
16	1	2020-05-25	2020-05-31	43983	1	59	1	61.466		2	1		2	165	70	25.7117	9999	9999	9999	9999	9999	9999	1	2	2	2	2	2	2	2	2	2	2	2	2	2	9999	2	9999								9999	9999	9999
16	5	2020-05-20	2020-05-24	4.07014	7	83	2	24.206	2	2	1	3	2	129	40	24.037	2	9999	9999	9999	1	2	1	1	9999	9999	9999	9999	9999	9999	9999	9999	9999	9999	9999	9999	9999	9999	9999								2	2	2
16	9	2020-05-19	2020-05-23	8.95208	11	47	2	48.776	2	1			2	156	110	45.2005	9999	9999	9999	9999	9999	2	1	1	9999	9999	9999	1	9999	9999	9999	9999	9999	9999	9999	9999	9999	9999	9999								9999	9999	9999
16	12	2020-05-10	2020-05-18	21.125	17	70	2	38.766	2	2	1		2	145	93.2	44.3282	2	9999	9999	2	1	2	1	1	2	2	2	2	2	2	2	2	2	2	2	2	2	2	2								9999	9999	2
16	18	2020-05-04	2020-05-14	16.5	18	54	1	66.016		2	1		2	170	79	27.3356	9999	9999	9999	9999	1	2	2	1	2	2	2	2	2	2	2	2	2	2	2	2	2	2	2		55	0	5				2	2	2
16	13	2020-05-20	2020-05-20	4.375	13	54	1	67.836		2	1		2	172	89	30.0838	9999	9999	9999	2	1	2	1	1	2	2	2	2	2	2	2	2	2	2	2	2	2	2	2								9999	9999	2
16	2	2020-05-25	2020-05-28	1.14583	4	37	1	65.106		1			2	169	57.1	19.9923	2	2	9999	2	1	2	1	2	2	2	2	2	2	2	2	2	2	2	2	2	2	2	2								2	2	2
16	6	2020-05-11	2020-05-23	5.375	13	77	2	52.416	2	1			2	160	86	33.5938	2	9999	9999	2	1	9999	1	1	2	2	2	2	2	2	2	2	2	2	2	2	2	2	2								9999	9999	9999
16	16	2020-05-05	2020-05-13	23.5	15	60	1	68.746		1			2	173	101	33.7465	2	1	9999	2	2	2	1	1	2	2	2	2	2	2	2	2	2	2	2	2	2	2	2	2016-05-10	55	0	4				9999	9999	2
16	12	2020-05-07	2020-05-17	17.5	12	60	1	65.106		2	1	7	2	169	94.6	33.1221	2	9999	9999	2	1	2	2	2	2	2	2	2	2	2	2	2	2	2	2	2	2	2	2								2	2	2
16	7	2020-05-16	2020-05-25	15.5	7	73	1	61.466		2	1	5	2	165	83	30.4867	2	9999	9999	2	1	2	1	1	2	2	2	2	2	2	2	2	2	2	2	2	2	2	2								2	2	2
16	26	2020-05-19	2020-05-16	24.5	26	63	1	64.196		2	1	2	2	168	80.2	28.4155	2	9999	9999	9999	1	2	1	1	2	2	2	2	2	2	2	2	2	2	2	2	2	2	2								9999	9999	2
16	15	2020-05-07	2020-05-13	15.5	15	55	1	66.016		2	1	6	2	170	70	24.2215	9999	9999	9999	9999	1	2	1	1	2	2	2	2	2	2	2	2	2	2	2	2	2	2	2								9999	9999	9999
16	14	2020-05-07	2020-05-14	10.3333	17	62	1	56.916		2	1	1	2	160	70	27.3438	2	9999	9999	2	1	2	2	2	2	2	2	2	2	2	2	2	2	2	2	2	2	2	2								2	2	2
16	10	2020-05-26	2020-05-29	8.4375	11	55	1	56.916		2	1	3	2	160	86.3	33.7109	9999	9999	9999	2	1	9999	1	1	2	2	2	2	2	2	2	2	2	2	2	2	2	2	2								9999	9999	9999
16	9	2020-05-31	2020-06-05	13.5	9	65	1	56.916		2	1	5	2	160	82	32.0312	2	9999	9999	2	1	2	1	2	2	2	2	2	2	2	2	2	2	2	2	2	2	2	2								2	2	2
16	2	2020-05-18	2020-06-12	23.5	2	52	1	66.016		2	1	1	2	170	100	34.6021	2	9999	9999	2	1	2	1	1	2	2	2	2	2	2	2	2	2	2	2	2	2	2	2								9999	9999	9999
16	3	2020-06-05	2020-06-08	2.34028	3	41	1	73.296		2	1	5		178	93	29.3524	9999	1	9999	9999	9999	9999	2	2	2	2	2	2	2	2	2	2	2	2	2	2	2	2	2								9999	9999	9999
16	12	2020-05-31	2020-06-01	15.5	12	58	1	66.016		2	1	6	2	170	93.3	32.2837	2	9999	9999	2	1	9999	1	9999	9999	9999	9999	9999	9999	2	2	2	2	2	2	2	2	2	2								9999	9999	9999
16	10	2020-05-28	2020-06-02	14.5	10	51	1	61.466		2	1		2	165	73.9	27.1442	9999	9999	9999	2	1	9999	9999	9999	9999	9999	9999	9999	9999	2	2	2	2	2	2	2	2	2	2								9999	9999	9999
16	6	2020-06-01	2020-06-04	8.5	6	66	1	67.836		2	1	6	2	172	104	35.1541	9999	9999	9999	9999	1	2	2	1	2	2	2	2	2	2	2	2	2	2	2	2	2	2	2								9999	9999	2
16	12	2020-05-20	2020-05-29	13.5	12	49	1	63.286		2	1		2	167	80	28.6851	2	9999	9999	2	1	2	1	2	2	2	2	2	2	2	2	2	2	2	2	2	2	2	2								2	2	2
16	5	2020-06-19	2020-06-25	-0.770833	5	63	1	66.016		1			2	170	91	31.4879	9999	9999	9999	9999	1	9999	2	1	2	2	2	2	2	2	2	2	2	2	2	2	2	2	2								9999	9999	9999
16	10	2020-06-01	2020-06-12	9.27083	18	55	1	67.836		2	1	12	2	172	87.3	29.5092	2	9999	9999	2	1	2	2	2	2	2	2	2	2	2	2	2	2	2	2	2	2	2	2								2	2	2
16	10	2020-06-17	2020-06-21	-0.0201389	13	70	1	64.196		1			2	168	153	54.2092	2	9999	9999	9999	1	2	1	1	2	2	2	2	2	2	2	2	2	2	2	2	2	2	2								9999	9999	9999
16	18	2020-06-11	2020-06-12	16.4792	18	65	2	47.866	2	2	1	5	2	155	80.8	33.6316	2	1	9999	9999	1	2	1	2	2	2	2	2	2	2	2	2	2	2	2	2	2	2	2								2	2	2
16	14	2020-04-24	2020-04-29	12.5	20	39	1	52.366		2	1	7	2	155	70	29.1363	9999	9999	9999	9999	9999	9999	2	2	2	2	2	2	2	2	2	2	2	2	2	2	2	2	2								9999	9999	9999
16	17	2020-04-23	2020-05-08	20.5	17	54	2	58.786	2	1			2	167	86	30.8365	9999	9999	9999	9999	9999	9999	1	2	2	2	2	2	9999	2	2	2	2	2	2	2	2	2	2								9999	9999	9999
16	18	2020-04-30	2020-05-05	1.5	16	40	1	75.116		2	1	9	2	180	96	29.6296	9999	9999	9999	9999	1	9999	9999	9999	9999	9999	9999	9999	9999	9999	9999	9999	9999	9999	9999	9999	9999	9999	9999	2020-05-12	55	0	4				2	2	2
16	12	2020-05-09	2020-05-13	14.5	12	43	1	61.466		2	1	3	2	165	66	24.2424	9999	9999	9999	2	1	9999	1	1	9999	9999	9999	9999	9999	9999	9999	9999	1	2	9999	2	9999	2	2								9999	9999	9999
16	36	2020-06-02	2020-06-05	33.375	99	43	2	46.046	2	2	1	5	2	153	51.4	21.9574	9999	9999	9999	2	1	9999	2	2	2	2	2	2	2	2	2	2	2	2	2	2	2	2	2								2	2	2
16	15	2020-06-01	2020-06-07	14.5	15	50	1	75.116		2	1	9	2	180	150	46.2963	9999	9999	9999	2	1	9999	1	1	2	2	2	2	2	2	2	2	2	2	2	2	2	2	2								9999	9999	9999
16	23	2020-05-20	2020-05-28	27.2986	23	46	1	66.016		2	1	2	2	170	101	34.9481	9999	9999	9999	2	1	9999	2	2	9999	9999	9999	9999	9999	9999	9999	9999	9999	9999	9999	9999	9999	9999	9999								9999	9999	9999
16	31	2020-05-09	2020-05-16	22.0028	65	41	1	52.366		2	1	15	2	155	76	31.6337	9999	9999	9999	2	1	9999	2	2	2	2	2	2	2	2	2	2	2	2	2	2	2	2	2								9999	9999	9999
16	72	2020-05-28	2020-05-29	7.5	74	36	1	61.466		2	1	5	2	165	64	23.5078	9999	9999	9999	2	1	9999	2	2	2	2	2	2	2	2	2	2	2	2	2	2	2	2	9999								2	2	2
16	12	2020-07-15	2020-07-18	12.0194	24	33	1	70.566		2	1	15	2	175	78.2	25.5347	9999	9999	9999	9999	1	9999	1	2	2	2	2	2	2	2	2	2	2	2	2	2	2	2	2								9999	9999	9999
16	26	2020-06-21	2020-07-03	26.5	26	50	1	66.016		2	1	13	2	170	100.9	34.9135	9999	9999	9999	9999	1	9999	1	1	2	2	2	2	2	2	2	2	2	2	2	2	2	2	2								9999	9999	9999
16	20	2020-07-17	2020-07-17	16.5	15	51	1	66.016		2	1	11	1	170	104.5	36.1592	9999	9999	9999	9999	1	9999	2	2	2	2	2	2	2	2	2	2	2	2	2	2	2	2	2								2	2	2
16	13	2020-06-18	2020-07-06	16.5	13	41	1	56.916		1			2	160	170	66.4062	9999	9999	9999	2	1	9999	1	1	9999	2	9999	9999	9999	9999	9999	2	2	9999	2	2	2	2	2	2020-07-03	55	1	5				9999	9999	9999
16	24	2020-07-14	2020-07-18	0	26	39	1	75.116		2	1	9	1	180	124	38.2716	9999	1	9999	1	2	9999	2	2	2	2	2	2	2	2	2	2	2	2	2	2	2	2	2								2	2	2
16	38	2020-05-23	2020-05-23	38	38	61	1	59.646		2	1	9	1	163	106	39.8961	2	1	2	9999	1	9999	2	1	2	2	2	2	2	2	2	2	2	2	2	2	2	2	2								2	2	2
16	23		2020-06-24	23	23	41	1	66.016		2	1	5	2	170	67	23.1834	9999	9999	9999	2	1	9999	9999	9999	9999	9999	9999	9999	9999	9999	9999	9999	9999	9999	9999	9999	9999	9999	9999								9999	9999	9999
16	28	2020-05-31	2020-06-12	27.8993	28	41	1	66.016		2	1	11	2	170	100	34.6021	9999	9999	9999	9999	9999	9999	2	1	9999	2	2	2	2	2	2	2	2	2	2	2	2	2	9999								9999	9999	9999
16	16	2020-06-07	2020-06-17	14.9174	15	35	2	51.506	2	1			2	159	90	35.5999	9999	1	9999	2	2	2	1	1	2	2	2	2	1	2	2	2	2	2	2	2	2	2	2								9999	9999	9999
16	14	2020-07-22	2020-08-03	21.5	14	44	1	59.646		2	1	5	2	163	80	30.1103	9999	9999	9999	9999	9999	9999	9999	9999	9999	9999	9999	9999	9999	9999	9999	9999	9999	9999	9999	9999	9999	9999	9999								9999	9999	9999
16	30	2020-07-27	2020-08-01	30	7	30	2	56.966	1	1			2	165	85.1	31.258	9999	9999	9999	9999	9999	2	2	2	2	2	2	2	2	2	2	2	2	2	2	2	2	2	2								2	2	2
16	12	2020-06-26	2020-06-25	9.77986	12	39	1	67.836		2	1	2	2	172	100	33.8021	2	2	2	2	2	2	2	2	2	2	2	2	2	2	2	2	2	2	2	2	2	2	2								2	2	2
16	29	2020-08-01	2020-08-13	29	29	34	1	61.466		1			2	165	123	45.1791	9999	9999	9999	2	1	9999	1	1	2	2	2	2	2	2	2	2	2	2	2	2	2	2	2								9999	9999	9999
16	7	2020-08-03	2020-08-15	9.5	7	59	1			2	1	9	2				2	9999	9999	9999	9999	9999	2	2	2	2	2	2	2	2	2	2	2	2	2	2	2	2	2								9999	9999	9999
16	16	2020-08-09	2020-08-07	16	16	52	1	75.116		2	1	9	2	180	99	30.5556	9999	9999	9999	2	1	9999	9999	9999	9999	9999	9999	9999	9999	9999	9999	9999	9999	9999	9999	9999	9999	9999	9999								9999	9999	9999
16	26	2020-08-05	2020-08-20	28.3729	26	41	1	75.116		1			2	180	92	28.3951	9999	9999	9999	1	2	9999	2	9999	9999	9999	9999	9999	9999	9999	9999	9999	9999	9999	9999	9999	9999	9999	1								9999	9999	9999
16	10	2020-08-07	2020-08-22	10.5	10	36	1	75.116		2	1	11	2	180	87	26.8519	9999	1	9999	2	9999	1	2	2	2	2	2	2	2	2	2	2	2	2	2	2	2	2	2								2	2	2
16	22	2020-07-25	2020-07-28	10	33	38	1	79.666		1			2	185	102	29.8028	9999	9999	9999	9999	1	1	2	1	2	2	2	2	2	2	2	2	2	2	2	2	2	2	2								9999	9999	9999
16	24		2020-05-22	4.5	108	55	1	70.566		1			2	175	96.1	31.3796	9999	9999	9999	9999	9999	9999	2	1	2	2	9999	9999	9999	9999	9999	1	9999	9999	9999	9999	9999	9999	9999								9999	9999	9999
16	41	2020-06-26	2020-06-26	10.125	65	38	1	70.566		2	1	17	2	175	70	22.8571	9999	9999	9999	2	1	9999	1	1	9999	9999	2	2	2	2	2	1	2	2	2	2	2	2	2								9999	9999	9999
16	6	2020-04-06	2020-04-09	6	6	55	1	56.916		2	1	3	2	160	64	25	9999	9999	9999	2	1	1	2	2	2	2	2	2	1	2	2	2	2	2	2	2	2	2	2								9999	9999	9999
16	8	2020-04-18	2020-04-17	8	8	63	2	57.876	2	1			2	166	60.4	21.919	9999	9999	9999	9999	1	9999	1	1	2	9999	2	2	2	2	2	2	2	2	2	2	2	2	2								9999	9999	9999
16	33	2020-08-10	2020-08-21	24.5	33	49	2	56.966	2	1			2	165	105	38.5675	2	9999	9999	9999	9999	9999	2	2	2	2	2	2	2	2	2	2	2	2	2	2	2	2	2								2	2	2
16	1	2020-08-15	2020-08-20		2	32	2	46.956	1	1			2	154	84	35.4191	9999	9999	9999	9999	9999	2	2	2	2	2	2	2	2	2	2	2	2	2	2	2	2	2	2								2	2	2
16	1	2020-10-04	2020-10-20		2	31	2	56.966	2	2	1	9	2	165	95	34.8944	2	1	9999	9999	9999	9999	2	2	2	2	2	2	2	2	2	2	2	2	2	2	2	2	1								2	2	2
22	3	2020-06-02	2020-06-04	2.45833	5	51	1	66.016		2	1	14	2	170	90	31.1419	9999	9999	2	2	2	9999	1	1	1	2	2	2	2	2	2	1	1	2	9999	2	2	2	2								2	2	1
22	11	2020-03-30	2020-04-09	3.76042	20	69	2	52.416	2	2	1	2	2	160	90	35.1562	2	2	2	2	2	2	1	2	2	1	2	2	2	2	2	2	2	2	2	2	2	2	2								2	1	1
22	4	2020-04-22	2020-04-23	1.45139	5	75	2	42.406	2	2	1	1	2	149	101	45.4934	2	1	2	2	1	2	1	1	1	1	1	1	1	2	2	2	2	2	2	2	2	2	2								1	1	1
22	15	2020-04-25	2020-04-25	14.5	15	57	1	61.466		2	2	3	2	165	70	25.7117	2	1	2	2	2	1	9999	9999	9999	9999	9999	9999	9999	9999	9999	9999	9999	9999	9999	9999	9999	9999	9999								9999	9999	9999
22	1	2020-04-27	2020-05-29	1.5	43	50	2	47.866	2	1			2	155	75	31.2175	2	2	1	2	1	2	1	1	2	2	2	2	2	2	2	2	2	2	2	2	2	2	2								1	9999	1
22	9	2020-04-23	2020-05-02	0	10	53	1	66.016		1			2	170	80	27.6817	2	1	2	2	1	2	1	1	2	2	2	2	1	2	2	2	2	2	2	2	2	2	2								1	2	1
22	6	2020-05-01	2020-05-01	6.22222	6	56	1	61.466		2	1	2	2	165	80	29.3848	2	1	1	2	1	9999	9999	9999	9999	9999	9999	9999	9999	9999	9999	9999	9999	9999	9999	9999	9999	9999	9999								9999	9999	9999
22	10	2020-05-01	2020-05-03	0	11	46	1	66.016		1			2	170	70	24.2215	9999	9999	9999	9999	9999	2	1	2	1	2	2	2	2	2	2	2	2	2	2	2	2	2	2	2017-09-14	35	0					2	2	1
22	2	2020-05-02	2020-05-05	3.21875	2	64	1	61.466		2	1	3	2	165	60	22.0386	9999	9999	9999	9999	9999	2	2	2	2	2	2	2	1	2	2	2	2	2	2	2	2	2	2								2	2	2
22	14	2020-05-06	2020-05-13	20.8194	21	59	1	61.466		2	1	2	2	165	80	29.3848	2	1	1	2	1	2	1	2	2	2	2	2	2	2	2	2	2	2	2	2	2	2	2								2	2	2
22	36	2020-05-21	2020-05-21	16.5	36	61	1	66.016		2	1	14	2	170	75	25.9516	9999	2	9999	2	1	9999	1	1	9999	9999	9999	9999	9999	9999	9999	9999	9999	9999	9999	9999	9999	9999	9999								9999	9999	9999
22	9	2020-05-05	2020-05-06			58	1	62.376		2	1	14	2	166	95	34.4753	9999	2	9999	9999	9999	9999	2	1	2	2	2	2	2	2	2	2	9999	9999	9999	2	2	9999	9999								2	2	2
22	17	2020-05-17	2020-05-15	16.8264	18	48	1	61.466		2	1	14	2	165	65	23.8751	9999	9999	9999	2	1	2	1	1	2	2	2	2	2	2	2	2	2	2	2	2	2	2	9999								9999	9999	9999
22	32	2020-05-21	2020-05-21	0	32	80	1	56.916		2	1	5	2	160	57	22.2656	9999	9999	9999	2	1	1	1	1	1	2	9999	9999	2	2	2	9999	2	2	2	2	2	2	2								1	2	2
22	12	2020-05-27	2020-05-29	11.0069	14	83	2	47.866	2	1			2	155	70	29.1363	9999	9999	9999	1	9999	2	2	2	2	2	2	2	1	2	2	2	2	2	2	2	2	2	2	2018-12-23	60	0	4				2	2	2
22	10	2020-05-16	2020-05-15	0	10	35	1	56.916		2	1	1	2	160	70	27.3438	9999	9999	9999	9999	9999	2	2	2	2	2	2	2	2	2	2	2	2	2	2	2	2	2	2								9999	9999	9999
22	13	2020-05-22	2020-05-26	0	17	55	1	75.116		2	1	7	2	180	80	24.6914	9999	9999	9999	9999	9999	2	2	1	2	2	2	2	2	2	2	2	2	2	2	2	2	2	2								2	1	2
22	24	2020-05-04	2020-05-15	0	25	41	1	56.916		2	1	3	2	160	60	23.4375	2	9999	9999	9999	9999	9999	2	2	2	2	2	2	2	2	2	2	2	2	2	2	2	2	2								9999	9999	9999
22	10	2020-05-29	2020-05-29	7.11806	10	38	1	66.016		2	1	14	2	170	85	29.4118	9999	9999	9999	9999	9999	2	2	2	2	2	2	2	2	2	2	2	2	2	2	2	2	2	2								2	2	2
22	2	2020-05-15	2020-05-15	1.73611	2	50	2	43.316	2	2	1	8	2	150	177	78.6667	9999	9999	9999	9999	9999	9999	9999	1	9999	9999	9999	9999	9999	9999	9999	9999	9999	9999	9999	9999	9999	9999	9999								2	2	2
22	6	2020-05-14	2020-05-25	0	40	62	1	68.746		2	1	14	2	173	68	22.7204	9999	1	9999	9999	1	2	1	1	1	1	2	2	2	2	2	2	1	2	2	2	2	2	1	2020-03-08	50	0	2		41		1	2	2
22	7	2020-05-28	2020-05-29	15.2694	14	69	1	75.116		2	1	17	2	180	80	24.6914	9999	1	1	2	1	2	2	2	2	2	2	2	2	2	2	2	2	2	2	2	2	2	2								9999	9999	9999
22	6	2020-05-22	2020-05-22	2.73611	6	69	1	70.566		2		17	2	175	85	27.7551	9999	9999	9999	2	9999	2	9999	1	9999	9999	9999	9999	9999	9999	9999	9999	9999	2	2	2	2	2	2	2012-09-19	63	0	4				9999	9999	9999
22	10	2020-05-23	2020-05-23	9.82292	10	43	1	61.466		2	1	2	2	165	65	23.8751	9999	9999	9999	2	1	2	9999	9999	9999	9999	9999	9999	1	9999	9999	9999	9999	9999	9999	9999	9999	9999	9999								9999	9999	9999
22	8		2020-05-17	0	9	70	1	75.116		2	1	5	2	180	80	24.6914	2	2	9999	9999	9999	2	1	1	2	2	2	2	2	2	2	1	1	2	2	2	2	2	2								9999	9999	2
22	7	2020-05-15	2020-05-16	3.39167	13	49	1	66.016		2	1	1	2	170	75	25.9516	2	1	9999	9999	9999	2	2	2	2	2	2	2	2	2	2	2	2	2	2	2	2	2	2								2	2	2
22	29	2020-05-19	2020-05-19	24.9403	60	85	2	52.416	2	2	1	5	2	160	60	23.4375	9999	2	9999	9999	9999	2	1	1	2	2	2	2	1	2	2	2	2	2	2	2	2	2	2								9999	9999	2
22	25	2020-05-20	2020-05-12	9.66667	25	53	1	61.466		2	1	14	2	165	60	22.0386	9999	9999	9999	9999	9999	2	1	1	2	2	2	2	2	2	2	2	2	2	2	2	2	2	2								9999	9999	9999
22	7	2020-05-20	2020-05-20	6.5	7	53	1	61.466		2	1	2	2	165	75	27.5482	9999	9999	9999	9999	9999	2	2	1	1	1	9999	9999	9999	9999	9999	9999	9999	9999	9999	9999	9999	9999	9999								9999	9999	9999
22	15	2020-05-31	2020-06-01	22.5	15	85	2	79.716	2	2	1	6	2	190	80	22.1607	9999	9999	9999	2	9999	2	1	1	2	2	2	2	2	2	2	1	1	2	2	2	2	2	2								2	2	2
22	6	2020-06-01	2020-06-01	0	6	71	1	58.736		2	1	5	2	162	90	34.2936	2	1	2	2	1	2	2	1	9999	9999	2	2	2	2	2	2	2	2	2	2	2	2	2								9999	9999	2
22	10	2020-06-03	2020-06-02	0	10	90	2	52.416	2	2	1	5	2	160	60	23.4375	2	1	2	2	2	2	1	1	1	9999	2	2	2	2	2	2	2	2	2	2	2	2	2								9999	9999	9999
22	17	2020-05-23	2020-05-24	0	29	39	1	66.016		2	1	5	2	170	70	24.2215	9999	9999	9999	9999	9999	2	2	2	9999	2	9999	9999	9999	9999	9999	9999	9999	2	2	2	2	2	2								9999	9999	9999
22	43	2020-06-06	2020-06-06	0	43	66	1	66.016		2	1	5	2	170	78	26.9896	9999	9999	9999	9999	9999	2	1	1	2	2	2	2	2	2	2	1	1	2	2	2	2	2	9999								2	2	9999
22	7	2020-06-02	2020-06-03	7.3625	8	68	1	75.116		2	1	5	2	180	90	27.7778	9999	9999	1	9999	9999	2	1	1	2	2	2	2	2	2	2	1	1	2	2	2	2	2	2								9999	9999	9999
22	1	2020-05-24	2020-05-24	0	1	60	2		2	2		5	2		80		9999	1	9999	9999	2	2	1	1	2	2	2	2	2	2	2	2	2	2	2	2	2	2	2								9999	9999	2
22	1	2020-05-31	2020-06-14	0	33	67	1	58.736		2	1	9	2	162	95	36.1988	2	9999	9999	1	2	2	1	1	1	1	2	2	2	2	2	1	1	2	2	2	2	2	2	2016-06-29	40	0	1	42.7			9999	9999	9999
22	15	2020-04-25	2020-05-12	19.0556	35	66	1	66.016		2	2	14	2	170	80	27.6817	9999	2	9999	9999	9999	9999	1	1	9999	1	9999	9999	9999	9999	9999	1	9999	9999	9999	9999	9999	9999	9999								9999	9999	9999
22	1		2020-05-14	0.430556	1	80	2	56.966		1			2	165	85	31.2213	2	2	9999	9999	1	9999	1	1	1	2	9999	9999	9999	9999	9999	9999	9999	9999	9999	9999	9999	9999	9999								9999	9999	1
22	8	2020-05-13	2020-05-14	7.07639	9	51	1	62.376		2	1	3	1	166	60	21.7738	2	1	9999	2	2	2	1	2	2	2	2	2	2	2	2	2	2	2	2	2	2	2	2								2	2	2
22	9	2020-05-04	2020-05-04	5.54167	9	65	1	66.016		1				170	70	24.2215	2	1	9999	9999	9999	9999	1	1	9999	9999	9999	9999	9999	9999	9999	9999	9999	9999	9999	9999	9999	9999	9999								9999	9999	9999
22	13	2020-05-03	2020-05-08	0	16	60	1	56.916		2	1	1		160	60	31.1419	9999	9999	9999	9999	1	9999	1	1	9999	9999	9999	9999	9999	9999	9999	9999	9999	9999	9999	9999	9999	9999	9999								9999	1	9999
22	9	2020-05-07	2020-05-10	9.00694	12	66	1	56.916		2	1	5		160	66.51	24.5578	9999	2	9999	9999	9999	9999	1	1	1	2	2	2	2	2	2	1	1	2	2	2	2	2	2	2016-11-10	45	0	4				9999	9999	9999
22	8	2020-05-09	2020-05-09	6.41667	8	54	1	61.466		2	2	3		165	65	24.2215	2	2	2	2	1	2	1	1	2	2	2	2	2	2	2	2	2	2	2	2	2	2	2								9999	9999	9999
22	5	2020-05-12	2020-05-14	0	22	50	2	56.966	2	2	1	14	2	165	75	31.1419	9999	2	9999	9999	9999	2	1	1	9999	1	1	1	9999	9999	9999	9999	9999	9999	9999	9999	9999	9999	9999								1	9999	9999
22	5	2020-05-13	2020-05-23	-0.15625	22	70	2	45.136	2	2	2	5	2	152	82.9	24.5578	2	2	2	2	1	2	1	1	9999	9999	9999	9999	9999	9999	9999	9999	2	2	2	2	2	2	2	2010-03-07	53	0					9999	9999	9999
22	3	2020-05-27	2020-05-25	2.72569	5	49	2	50.596	2	1			2	158	78	24.2215	2	2	2	2	1	2	1	1	9999	9999	9999	2	2	1	2	2	2	2	2	2	2	2	2								9999	9999	9999
22	8	2020-05-18	2020-05-27	7.5	17	39	2	52.416		2		14	2	160	110	31.1419	2	1	2	2	2	2	2	2	2	2	2	2	2	2	2	2	2	2	2	2	2	2	2								2	2	2
22	11	2020-06-03	2020-06-07	0	15	46	1	66.926		2		1	2	171	80	24.5578	2	1	9999	9999	2	2	2	2	2	2	2	2	2	2	2	2	2	2	2	2	2	2	2								2	2	9999
22	4	2020-06-01	2020-06-08	0	17	57	1	70.566		2		7	2	175	100	24.2215	2	1	9999	9999	2	2	1	1	2	2	2	2	2	2	2	1	9999	2	2	2	2	2	2								9999	9999	9999
22	3	2020-06-02	2020-06-04	0	35	51	1	66.016		2	1	14	2	170	90	31.1419	2	9999	9999	9999	1	2	2	1	1	2	2	2	2	2	2	2	2	2	2	2	2	2	2								9999	9999	9999
22	10	2020-06-03	2020-06-03	6.46875	10	53	1	70.566		2	1	2	2	175	75	24.5578	2	1	2	2	2	2	2	2	2	2	2	2	2	2	2	2	2	2	2	2	2	2	2								2	2	2
22	2	2020-06-04	2020-06-05	0	54	73	1	61.466		2	1	8	2	165	77	24.2215	9999	2	9999	9999	1	9999	1	9999	1	1	2	2	2	2	2	1	1	9999	2	2	2	2	2	2019-07-27	45	0	4				9999	9999	1
22	2	2020-06-09	2020-06-08	0	5	35	1	70.566		2	1	2	2	175	80	31.1419	2	9999	9999	9999	9999	2	2	2	2	2	2	2	2	2	2	2	2	2	2	2	2	2	2								2	2	2
22	13	2020-06-14	2020-06-13	0	13	70	2	52.416	2	2	1	2	2	160	70	24.5578	9999	9999	9999	9999	9999	2	2	2	2	2	2	2	2	2	2	2	2	2	2	2	2	2	2								2	2	2
22	4	2020-06-01	2020-06-02	0	5	71	2	27.846	2	2	1	5	2	133	61	24.2215	2	1	2	9999	2	9999	1	1	1	2	2	2	2	2	2	2	2	2	2	2	2	2	2	2019-06-26	52	0	1	43.9			9999	9999	9999
22	85	2020-05-21	2020-05-25	0	90	41	2	46.046	2	2	1	2	2	153	99.2	31.1419	2	1	2	2	2	2	1	1	2	2	2	2	2	2	2	2	2	2	2	2	2	2	2								2	2	2
22	2	2020-06-08	2020-06-07	0	4	58	1	71.476		2	1	14	2	176	80	24.5578	9999	9999	9999	9999	9999	9999	2	2	2	2	2	2	2	2	2	2	2	2	2	2	2	2	2								2	2	2
22	4	2020-06-09	2020-06-07	15.5104	5	48	1	66.016		2	1	3	2	170	80	24.2215	9999	9999	9999	9999	9999	9999	9999	9999	9999	9999	9999	9999	9999	9999	9999	9999	9999	9999	9999	9999	9999	9999	9999								9999	9999	9999
22	26	2020-05-19	2020-05-08	0	27	59	1	62.376		2	1	8	2	166	104	31.1419	9999	9999	9999	9999	9999	2	2	2	2	2	2	2	2	2	2	2	2	2	2	1	2	2	9999								9999	9999	9999
22	4	2020-06-03	2020-06-04	35.125	5	67	2	46.046	2	2	1	1	2	153	72	24.5578	9999	9999	9999	9999	9999	9999	1	1	1	2	2	2	2	2	2	2	2	2	2	2	2	2	2	2020-02-27	55	0	1	34.2			2	2	1
22	16	2020-06-11	2020-06-07	0	16	54	1	66.016		2	1		2	170	82	24.2215	9999	9999	9999	9999	9999	2	1	2	2	2	2	2	2	2	2	2	2	2	2	2	2	2	2								2	2	2
22	12	2020-06-06	2020-06-07	7.50694	12	69	1	64.196		2		1	2	168	71	31.1419	9999	9999	9999	9999	9999	2	2	2	2	2	2	2	2	2	2	2	2	2	2	2	2	2	2								2	2	2
22	6		2020-06-07	0	17	32	1	66.016		2		9	2	170	80	24.5578	9999	9999	9999	9999	9999	2	2	2	2	2	2	2	2	2	2	2	2	2	2	2	2	2	2								9999	9999	9999
22	20	2020-06-08	2020-06-08	0	34	67	1	71.476		2		2	2	176	65	24.2215	9999	9999	9999	9999	9999	2	2	2	2	2	2	2	2	2	2	2	2	2	2	2	2	2	2								2	2	2
22	7	2020-05-30	2020-06-11	1.81597	25	64	2	52.416	2	2		19	2	160	90	31.1419	9999	9999	9999	9999	9999	2	1	1	1	1	2	2	2	2	2	2	2	2	2	2	2	2	2	2020-01-13	25	0	4				1	2	2
22	23	2020-06-03	2020-06-01	22.6875	52	60	1	61.466		2	1	3	2	165	75	24.5578	9999	9999	9999	9999	9999	9999	2	2	2	2	2	2	2	2	2	1	2	2	2	2	2	2	2								2	2	2
22	12	2020-06-01	2020-06-01	0.520833	12	41	1	66.016		2	1	5	2	170	70	24.2215	9999	9999	9999	9999	9999	2	1	9999	2	2	2	2	2	2	2	2	9999	2	2	2	2	2	2								9999	9999	9999
22	5	2020-06-10	2020-06-11	0	12	44	1	66.016		2		1	2	170	100	31.1419	2	2	2	2	9999	2	1	1	2	2	2	2	2	2	2	2	2	2	2	2	2	2	2								9999	9999	9999
22	26	2020-05-27	2020-05-27	19.5	28	61	1	66.016		1			2	170	100	24.5578	9999	2	9999	9999	9999	2	1	1	2	2	2	2	2	2	2	2	2	2	2	2	2	2	2								9999	9999	2
22	1		2020-06-13	0	32	67	1	58.736		2		9	2	162	59	24.2215	2	2	2	1	9999	9999	1	1	1	1	2	2	2	2	2	2	2	2	2	2	2	2	2	2016-06-29		0	1	42.7			9999	9999	1
22	8	2020-06-01	2020-06-03	0	10	50	1	84.216		2	1	5	2	190	70	31.1419	9999	2	9999	9999	9999	2	2	1	2	2	2	2	2	2	2	2	2	2	2	2	2	2	9999								9999	9999	9999
22	44	2020-06-02	2020-06-03	0	45	72	1	66.016		2	1	2	2	170	80	24.5578	2	2	2	2	1	9999	1	1	9999	9999	2	2	2	2	2	2	2	2	2	2	2	2	2								9999	9999	2
22	12	2020-06-02	2020-06-04	4.5	14	78	1	66.016		2	1	17	2	170	65	24.2215	2	1	2	2	2	2	1	2	2	2	2	2	2	2	2	2	2	2	2	2	2	2	2								2	2	2
22	8	2020-06-02	2020-06-04	0	15	48	1	61.466		2	1	1	2	165	80	31.1419	2	2	2	2	1	2	1	2	2	2	2	2	2	2	2	2	2	2	2	2	2	2	2								9999	9999	9999
22	15	2020-05-18	2020-05-25	1.5625	22	46	1	61.466		2	1	3		165	60	24.5578	2	2	9999	9999	9999	2	2	2	2	2	2	2	2	2	2	2	2	2	2	2	2	2	2								2	2	2
22	16	2020-06-11	2020-06-05	14.2396	16	70	1	67.836		2	1	5	2	172	85	24.2215	2	9999	2	9999	1	2	2	2	2	2	2	2	2	2	2	2	2	2	2	2	2	2	2								2	2	2
22	1	2020-06-10	2020-06-07	0	5	42	1	67.836		2		6	2	172	54	31.1419	2	2	2	9999	1	2	2	2	2	2	2	2	2	2	2	2	2	2	2	2	2	2	2								2	2	2
22	13	2020-05-22	2020-05-26	0	17	55	1	75.116		2	1	7	2	180	80	24.5578	2	2		2	1	2	2	1	2	2	2	2	2	2	2	2	2	2	2	2	2	2	2								2	1	2
22	10	2020-06-09	2020-06-10	0	11	55	1	47.816		2	1	3	2	150	60	24.2215	2	1	2	2	1	2	1	1	2	1	2	2	2	2	2	2	2	2	2	2	2	2	2	2018-12-01	50	0	4				9999	9999	9999
22	5	2020-05-14	2020-05-26	0	40	62	1	68.746		2	1	14		173	68.08	31.1419	2	1	2	2	2	2	1	1	1	2	2	2	2	2	2	1	1	2	2	2	2	2	2	2020-03-08	45	0	1	41.5			1	9999	9999
22	14	2020-05-15	2020-05-15	1.30833	14	49	1	66.016		2	1	1		170	75	24.5578	9999	9999	9999	9999	9999	2	2	2	2	2	2	2	2	2	2	2	2	2	2	2	2	2	2								2	2	2
22	4	2020-05-19	2020-05-30	4.08333	15	63	1	56.916		2	1	8		160	60	24.2215	2	2	9999	9999	9999	9999	1	1	2	2	9999	9999	9999	2	2	2	2	2	2	2	2	2	2								9999	9999	9999
22	2	2020-05-29	2020-06-01	0	5	63	1	66.016		2	2	2	2	170	80	31.1419	2	9999	9999	2	9999	1	9999	1	1	9999	9999	9999	9999	9999	9999	9999	9999	9999	9999	9999	9999	9999	9999								1		9999
22	10	2020-06-06	2020-06-07	0	7		1	71.476		2	2		2	176	79	24.5578	9999	9999	9999	9999	9999	2	1	1	2	2	2	2	2	2	2	2	2	2	2	2	2	2	2								1	1	1
22	7	2020-06-09	2020-06-11	1.07292	8		1	63.286		2	2		2	167	78	24.2215	1	1	9999	9999	9999	2	1	1	9999	9999	9999	9999	9999	9999	9999	9999	9999	9999	9999	9999	9999	9999	9999								1	1	9999
22	12	2020-06-04	2020-06-04	1.50694	6		1	61.466		2	2		2	165	71	31.1419	2	1	9999	9999	9999	1	1	1	1	2	2	2	9999	9999	9999	9999	9999	9999	9999	9999	9999	9999	9999								1	1	1
22	8	2020-06-09	2020-06-09	3.34722	8	53	1	47.816		2	1		2	150	60	24.5578	2	1	1	2	1	2	1	1	2	2	2	2	2	2	2	1	1	2	2	2	2	2	2								1	1	2
22	12	2020-06-10	2020-06-10	13.4583	12	48	1	52.366		2	1		2	155	65	24.2215		1	1	2	1	2	1	1	2	2	2	2	2	2	2	2	2	2	2	2	2	2	2								1	1	2
22	42	2020-06-10	2020-05-11	26.9778	43	42	1	47.816		2	1		2	150	70	31.1419	2	1	1	2	1	2	1	1	2	2	2	2	2	2	2	2	2	2	2	2	2	2	2								1	1	1
22	4	2020-06-01	2020-06-11	0	5	53	1	52.366		2	1		2	155	73	24.5578	2	1	1	2	1	9999	9999	9999	9999	9999	9999	9999	9999	9999	9999	9999	9999	9999	9999	9999	9999	9999	9999								9999	9999	9999
22	21	2020-06-30	2020-07-01	20.941	22	52	1	66.016		2	1	7	2	170	65	24.2215	9999	9999	9999	2	2	2	1	1	2	2	2	2	2	2	2	1	2	2	2	2	2	2	2								1	9999	9999
22	21	2020-07-01	2020-07-02	0	22	76	1	69.656		1			2	174	88	31.1419	9999	1	9999	9999	9999	2	1	2	2	2	2	2	2	2	2	2	2	2	2	2	2	2	2								2	2	2
22	16	2020-07-14	2020-07-14	10.3889	16	55	1	67.836		2	1	1	2	172	77	24.5578	9999	9999	9999	9999	9999	9999	2	2	2	2	2	2	2	2	2	2	2	2	2	2	2	2	2								9999	9999	9999
22	10	2020-07-04	2020-07-04	0	10	52	1	75.116		2	1	1	2	180	90	24.2215	9999	9999	9999	9999	9999	2	2	1	2	2	2	2	2	2	2	2	2	2	2	2	2	2	2								2	2	2
22	20	2020-07-06	2020-07-06	17.5	38	59	1	61.466		2	1	21	2	165	65	31.1419	2	2	2	1	1	1	1	1	1	1	2	2	2	2	2	1	2	2	2	2	2	2	2								9999	9999	9999
22	18	2020-07-02	2020-07-07	17.5	23	71	1	66.016		2	1	5	2	170	99	24.5578	2	9999	9999	2	1	1	2	2	2	2	2	2	2	2	2	2	2	2	2	2	2	2	1	2020-06-20	50	1	1	31.4			9999	9999	2
22	33	2020-07-04	2020-07-07	0	69	62	1	66.016		1			2	170	85	24.2215	9999	9999	9999	9999	1	9999	2	2	2	2	2	2	2	2	2	2	2	2	2	2	2	2	2								9999	9999	9999
22	5	2020-06-20	2020-07-07	0	81	51	1	66.016		2	1	5	2	170	70	31.1419	2	2	2	2	1	9999	2	2	2	2	2	2	2	2	2	2	2	2	2	2	2	2	2								2	2	2
22	16	2020-07-15	2020-07-15	11.2708	17	38	1	57.826		2	1	14	2	161	70	24.5578	9999	9999	9999	9999	9999	9999	1	1	9999	9999	9999	9999	9999	9999	9999	9999	9999	9999	9999	9999	9999	9999	9999								9999	9999	9999
22	7	2020-07-11	2020-07-10	0	13	82	2	32.396	2	2		5	2	138	64.8	24.2215	9999	9999	9999	9999	9999	9999	1	1	1	1	2	2	2	2	2	1	2	2	2	2	2	2	2	2019-06-19	35	1	1	69.8			9999	9999	9999
22	1	2020-07-12	2020-07-13	0	12	47	1	61.466		2		1		165	70	31.1419	9999	9999	9999	9999	9999	9999	1	2	2	2	2	2	2	2	2	2	2	2	2	2	2	2	2								2	2	2
22	1	2020-05-24	2020-07-13	0	108	29	1	70.566		2		6	2	175	70	24.5578	9999	9999	9999	1	9999	2	2	2	2	2	2	2	2	2	2	1	1	2	2	2	2	1	2								2	2	2
22	5	2020-07-05	2020-07-07	3.60417	8	48	2	52.416	2	1			2	160	60	24.2215	9999	1	9999	9999	2	2	2	2	2	2	2	2	2	2	2	1	1	2	9999	2	2	2	2								2	2	2
22	4	2020-06-29	2020-07-08	0	14	50	1	71.931		2	1	1	2	176.5	98	31.1419	2	1	9999	2	2	2	9999	9999	2	2	2	2	1	2	2	2	2	2	2	2	2	2	2								2	2	2
26	19	2020-08-05	2020-08-14	23.1	19	57	2	44.226	2	1			2	151	110	24.5578	2	2	2	2	1	2	1	1	2	2	2	2	2	2	2	2	2	2	2	2	2	2	2								9999	9999	9999
26	31	2020-05-14	2020-05-14	20.9708	42	55	1	66.016		2	1	18	2	170	68	24.2215	2	1	2	2	2	2	2	2	2	2	2	2	2	2	2	2	2	2	2	2	2	2	2								2	2	2
26	7	2020-08-03	2020-08-06	0	10	50	2	54.236	2	2	1	7	2	162	65	31.1419	2	2	2	2	1	2	2	2	2	2	2	2	2	2	2	2	2	2	2	2	2	2	2								2	2	2
26	2	2020-05-29	2020-06-01	0	13	56	1	64.196		1			2	168	68	24.5578	2	2	2	2	1	2	1	1	2	2	2	2	2	2	2	2	2	2	2	2	2	2	2								2	2	2
26	18	2020-06-29	2020-06-29	0	18	82	1	56.916		1			2	160	72	24.2215	2	9999	2	2	1	9999	1	1	1	1	2	2	2	2	2	1	2	2	2	2	2	2	2								2	1	1
26	3	2020-08-15	2020-08-12	0	3	65	2	47.866	2	2	1	11	2	155	110	31.1419	2	2	2	2	1	2	1	1	1	2	2	2	2	2	2	2	2	2	2	2	2	2	2								2	1	1
26	8	2020-05-24	2020-05-24	7.29583	8	43	1	63.286		1			2	167	90	24.5578	2	2	2	2	1	2	2	2	2	2	2	2	2	2	2	2	2	2	2	2	2	2	2								2	2	2
26	3	2020-07-05	2020-07-13	0	8	35	2	52.416	1	1			2	160	96	24.2215	2	1	2	2	2	9999	1		2	2	2	2	2	2	2	2	2	2	2	2	2	2	2								2	2	2
26	71	2020-07-12	2020-06-22	12.0174	34	50	1	73.296		1			2	178	80	31.1419	2	2	2	2	1	1	2	2	2	2	1	2	2	2	2	2	2	2	2	2	2	1	2								2	2	2
26	8	2020-06-30	2020-07-01	0	18	50	1	66.016		2	1	Ughaan	2	170	150	24.5578	2	9999	9999	2	1	2	1	1	2	2	2	2	2	2	2	2	2	2	2	2	2	2	2								2	2	2
26	23	2020-06-20	2020-06-20	21.5208	23	83	2	47.866	2	1			2	155	60	24.2215	9999	9999	9999	2	1	2	1	1	9999	2	2	1	2	1	2	2	2	2	2	2	2	2	2								2	2	1
26	23	2020-05-22	2020-05-23	22.5118	23	53	1	56.916		1			2	160	75	31.1419	2	9999	9999	2	1	2	2	2	2	2	2	2	2	2	2	2	2	2	2	2	2	2	2								2	2	2
26	32	2020-05-28	2020-05-31	17.5833	35	65	1	73.296		2	1	1	2	178	88	24.5578					2	9999	2	2	2	2	2	2	2	2	2	2	2	2	2	2	2	2	2								2	2	2
26	7	2020-06-13	2020-06-13	-134.646	7	30	1	60.556		2	1		2	164	70	24.2215	2	1	2	2	2	9999	2	2	2	2	2	2	2	2	2	2	2	2	2	2	2	2	2								2	2	2
26	20	2020-07-08	2020-07-08	9.5	20	37	2	43.316	2	1			2	150	90	31.1419	1	1			1	2	2	2	2	2	2	2	2	2	2	2	2	2	2	2	2	2	2								2	2	2
26	2	2020-06-11	2020-06-11	0	9	48	1	70.566		2	1	1	2	175	62	24.5578	2	9999	9999	2	1	2	1	1	2	2	2	2	2	2	2	2	2	2	2	2	2	2	2								2	2	2
26	10	2020-07-28	2020-07-19	0	10	81	1	56.916		1			2	160	60	24.2215					1	2	2	2	2	2	1	2	2	2	2	2	2	2	2	2	2	2	2								2	2	2
26	10	2020-06-23	2020-06-23	0	13	80	1	66.016		1			2	170	62	31.1419					1	2	1	1	2	2	2	2	2	2	2	2	2	2	2	2	2	2	2								2	2	2
26	19	2020-05-26	2020-05-30	17.3417	21	48	2	56.966	2	2	1		2	165	108	24.5578	2	9999	9999	2	1	2	2	2	2	2	2	2	2	2	2	2	2	2	2	2	2	2	2								9999	9999	9999
26	4	2020-06-23	2020-06-23		9	47	1	66.016		2	1		2	170	65	24.2215		1				2	2	2	2	2	2	2	2	2	2	2	2	2	2	2	2	2	2								2	2	2
26	4	2020-06-18	2020-06-18	0	26	41	1	62.376		1			2	166	55	31.1419					1	2	2	2	2	2	2	2	2	2	2	2	2	2	2	2	2	2	2								2	2	2
26	16	2020-06-29	2020-06-29	5.125	16	76	2	56.966	2	1			2	165	105	24.5578	2	9999	9999	2	1	2	1	1	2	2	2	2	2	2	2	2	2	2	2	2	2	2	2	2017-07-31	62	0	4				2	1	1
26	2	2020-06-18	2020-06-20	-0.0416667	5	28	2	56.056	1	1			2	164	103	24.2215	2	9999	9999	2	1	2	2	2	2	2	2	2	2	2	2	2	2	2	2	2	2	2	2								2	2	2
26	12	2020-09-02	2020-09-07	5.19861	16	77	1	56.006		1			2	159	84	31.1419	2	9999	9999	2	1	2	2	1	2	2	1	2	2	2	2	2	2	2	2	2	2	2	2	2019-03-28	72	0	4				2	1	1
26	12	2020-08-17	2020-08-14	8.71875	26	62	1	65.106		1			2	169	85	24.5578	9999	9999	9999	9999	9999	9999	1	2	2	2	2	2	2	2	2	2	2	2	2	2	2	2	2								2	2	2
26	4	2020-07-27	2020-07-27	0	8	33	1	81.486		2	1		1	187	135	24.2215	2	9999	9999	2	1	2	2	1	2	2	2	2	1	2	2	1	2	2	2	2	2	2	2								2	2	2
26	30	2020-06-11	2020-06-11	33.5	30	57	2	43.316	2	1			2	150	114	31.1419	2	9999	9999	2	1	1	1	1	2	2	2	2	1	2	2	2	2	2	2	2	2	2	2	2019-12-03	64	1	4				2	1	2
26	32	2020-08-07	2020-08-07	22.9167	32		2	55.146	2	1			2	163	92	24.5578	2	2	2	2	1	2	2	1	2	2	2	2	2	2	2	2	2	2	2	2	2	2	2								9999	9999	2
26	7	2020-06-13	2020-06-21	0	19	48	2	45.136	2	1			2	152	65	24.2215	2	9999	9999	2	1	2	2	2	2	2	2	2	2	2	2	2	2	2	1	2	2	2	2								2	2	2
26	2	2020-05-29	2020-05-29	2.05556	3	44	1	64.196		2	1	7	2	168	72	31.1419	2	9999	9999	2	1	2	2	2	2	2	2	2	2	2	2	2	2	2	2	2	2	2	2								2	2	2
26	8	2020-06-21	2020-06-21	0	15	48	1	49.636		2	1		2	152	65	24.5578	2	9999	9999	2	1	2	1	2	2	2	2	2	2	2	2	2	2	2	2	2	2	2	2								2	2	2
26	17	2020-06-07	2020-06-13	15.0417	18	54	1	67.836		2	2	1	2	172	80	24.2215	2	1	2	2	2	2	1	1	2	2	2	2	2	2	2	2	2	2	2	2	2	2	2								2	2	2
26	2	2020-07-04	2020-07-04	0	17	71	2	61.516	1	2	1	8	2	170	102	31.1419	2	1	2	2	2	2	2	1	2	2	2	2	2	2	2	1	1	2	2	2	2	2	2								2	2	2
26	9	2020-05-12	2020-05-06	2.91667	9	57	2	41.496	2	1			2	148	70	24.5578	2	2	2	2	1	2	2	2	1	1	2	2	2	2	2	2	2	2	2	2	2	2	2								2	2	2
26	11	2020-05-23	2020-05-23	10.9167	11	60	1	75.116		2	1	20	2	180	89	24.2215	2	1	2	2	2	2	2	2	2	2	2	2	2	2	2	2	2	2	2	2	2	2	2								2	2	2
26	3	2020-06-13	2020-06-12	2.33333	64	35	1	55.096		2	1	2	2	158	107	31.1419	2	2	2	2	1	2	2	2	2	2	2	2	2	2	2	2	2	2	2	2	2	2	2								2	2	2
26	33	2020-06-29	2020-06-29	23.2222	33	59	2	44.226	2	1			2	151	83	24.5578	2	1	2	2	1	2	1	1	1	1	2	2	2	2	2	1	1	2	1	2	2	2	2								2	1	2
26	12	2020-06-22	2020-06-23	0	29	60	2	47.866	2	1			2	155	77	24.2215	2	2	2	2	1	2	2	2	2	2	2	2	1	2	2	2	2	2	2	1	2	2	2								2	2	2
26	36	2020-06-14	2020-06-16	35.4167	38	79	2	55.146	2	1			2	163	94	31.1419	2	2	2	2	1	2	1	1	2	2	2	2	2	2	2	2	2	2	1	2	2	2	2								1	2	2
26	2	2020-07-08	2020-07-08	0	12		1	52.366		2		11	2	155	59	24.5578	2	2	2	2	1	2	2	2	2	2	2	2	2	2	2	2	2	2	2	2	2	9999	2								2	2	2
26	7	2020-05-29	2020-05-30	5.30972	7	44	1			2	1	2	2		75		2	9999	9999	2	1	2	2	2	2	2	2	2	2	2	2	2	2	2	2	2	2	2	2								2	2	2
26	10	2020-07-09	2020-07-09	0	10	75	1	61.466		1			2	165	73	26.8136	2	9999	9999	2	1	9999	1	1	1	2	2	2	2	2	2	2	2	2	2	2	2	2	9999								2	1	1
26	13	2020-06-15	2020-06-03	10.5417	13	55		61.466		1				165	75	27.5482	9999	9999	9999	9999	1	2	1	1	2	2	2	9999	2	2	2	2	2	2	2	2	2	2	2								2	9999	9999
26	33	2020-06-11	2020-06-06	29.1042	33	61	2	56.966	2	2			2	165	72	26.4463	9999	9999	9999	9999	1	2	1	1	2	2	2	9999	1	2	2	2	2	2	2	2	2	2	2								2	2	2
26	5	2020-07-26	2020-07-27	0	11	65	1	67.836		1			2	172	80	27.0416	9999	9999	9999	9999	1	2	1	2	2	2	2	2	2	2	2	2	2	2	2	2	2	2	2								9999	9999	9999
26	26	2020-05-11	2020-05-12	24.2778	26	51	1	68.746		2	1	2		173	75	25.0593	2	2	2	2	1	2	1	2	2	2	2	2	2	2	2	2	2	2	2	2	2	2	2								2	2	2
26	12	2020-06-27	2020-06-27	0	4	70	1	64.196		2			2	168	85	30.1162	9999	9999	9999	9999	1	9999	1	9999	9999	2	2	9999	2	2	2	2	2	2	2	2	2	2	2								2	2	2
26	4	2020-06-13	2020-06-12	0	9	64	2	45.136	2	1			2	152	80	34.626	9999	9999	9999	9999	1	2	1	1	2	2	2	2	2	9999	2	1	1	2	2	2	2	2	1	2020-06-09	73	1					2	2	1
26	8		2020-06-13	16.5	8	39	1	66.016		2		6	2	170	89	30.7958	9999	9999	9999	9999	1	2	2	2	2	2	2	2	1	2	2	2	2	2	2	2	2	2	2								2	2	2
26	2	2020-08-09	2020-07-11	0	11	60	1	64.196		2			2	168	75	26.5731	2	2	2	2	1	2	1	1	2	2	2	2	2	2	2	2	2	2	2	2	2	2	2								2	2	2
26	26	2020-06-30	2020-07-01	0	39	47	1	80.576		2		11	2	186	113	32.6627	2	2	2	2	1	2	2	2	2	2	2	2	2	2	2	2	2	2	2	2	2	2	2								2	2	2
26	21	2020-06-27	2020-06-21	14.2083	15	69	1	64.196		2			2	168	90	31.8878	9999	9999	9999	9999	1	2	1	2	2	2	2	2	2	2	2	2	2	2	2	2	2	2	2								2	2	2
26	4		2020-06-15	13	4	23	1	64.196		1			2	168	55	19.487	2	2	2	2	1	9999	1	2	2	2	2	2	2	2	2	2	2	2	2	2	2	2	2								9999	9999	9999
26	18	2020-05-18	2020-05-24	17.75	20	55	1			2	1				70		2	2	2	2	1	2	1	2	1	2	2	2	2	2	2	2	2	2	2	2	2	2	1								2	2	2
26	8	2020-06-20	2020-06-20	3.25	12	48	1	56.916		2		6	2	160	80	31.25	9999	9999	9999	9999	1	2	2	2	2	2	2	9999	2	2	2	2	2	2	2	2	2	9999	2								2	2	2
26	5	2020-06-02	2020-06-05	0	15	31	1	60.556		2		1		164	90	33.4622	9999	9999	9999	9999	1	2	2	2	2	2	2	9999	2	2	2	2	2	2	2	2	2	2	9999								2	2	2
26	6	2020-07-04	2020-07-04	0	11	58	1	66.016		2		5	2	170	81	28.0277	2	1	2	2	2	2	1	1	2	2	2	2	2	2	2	2	2	2	2	2	2	2	2								2	2	2
26	3	2020-06-05	2020-06-05	0	14	85	2	45.136	2	1			2	152	75	32.4619	2	2	2	2	1	2	2	1	2	2	2	2	2	2	2	2	2	2	2	2	2	2	2	2020-01-23	73						2	2	2
26	6	2020-06-12	2020-06-12	0	13		1	56.916		2		27	2	160	80	31.25	2	2	2	2	1	2	1	1	2	2	2	2	2	1	2	2	2	2	2	2	2	2	2								2	2	2
26	6	2020-06-21	2020-06-21	0	11	47	2	38.766	2	2		7	2	145	75	35.6718	2	2	2	2	1	2	2	2	2	2	2	2	2	2	2	2	2	2	2	2	2	2	2								2	2	2
26	2	2020-06-30	2020-06-30	0	15	36	1	66.016		2			2	170	70	24.2215	2	2	2	2	1	2	1	2	2	2	2	2	2	2	2	2	2	2	2	2	2	2	2								2	2	2
26	17	2020-06-12	2020-06-12	17	17	52	1	44.176		2	1	22	1	146	60	28.1479	2	2	2	2	2	2	1	2	2	2	2	2	2	2	2	2	2	2	2	2	2	2	2								2	2	2
26	2	2020-06-24	2020-06-22	0	6	26	2	51.506	2	2	1	9	2	159	70	27.6888	2	1	2	2	2	2	2	2	2	2	2	2	2	2	2	2	2	2	2	2	2	2	2								2	2	2
26	4	2020-06-15	2020-06-15	3.83333	5	55	1	66.016		2		3	2	170	72	24.9135	2	9999	9999	2	1	9999	9999	9999	9999	2	9999	2	2	2	2	2	2	2	2	2	2	2	2								9999	9999	9999
26	23	2020-05-29	2020-05-30	10.1167	27	69	1	61.466		2	1	9	2	165	80	29.3848	2	9999	9999	2	1	2	2	2	2	2	2	2	2	2	2	2	2	2	2	2	2	2	2								2	2	2
26	25	2020-06-25	2020-06-30	8	26	45	2	56.966	2	2	1	7	1	165	75	27.5482	2	2	2	2	1	9999	1	1	2	2	2	2	2	2	2	2	2	2	2	2	2										2	1	2
26	5	2020-07-25	2020-07-25	0	10	76	2	47.866	2	1			2	155	79	32.8824	2	2	2	2	1	2	1	1	2	2	2	2	2	2	2	2	1	2	2	2	2	1	2								2	2	1
26	17	2020-07-04	2020-07-04	15.5625	17	56		66.016		2		5	2	170	65	22.4913	2	2	2	2	1	9999	1	1	9999	2	2	2	2	2	2	2	2	2	2	2	2	2	2								2	2	2
26	7	2020-07-05	2020-07-05	0	14	82	1	56.916		2		9	2	160	76	29.6875	2	2	2	2	1	9999	1	1	9999	2	2	2	2	2	2	2	2	2	2	2	2	2	2								9999	9999	9999
26	3	2020-07-29	2020-07-29	0	6	92	1	64.196		1			2	168	59	20.9042	2	2	2	2	1	2	1	2	1	2	2	2	2	2	2	2	2	2	2	2	2	2	2								2	2	2
26	5	2020-06-06	2020-06-06	4.46875	5	49	1	55.096		2	1	15	2	158	62	24.8358	9999	9999	9999	9999	1	9999	9999	9999	9999	9999	9999	9999	9999	9999	9999	9999	9999	9999	9999	9999	9999	9999	9999								9999	9999	9999
26	4	2020-06-19	2020-06-21	0	4	77	1	65.106		1			2	169	71	24.8591	2	1	2	2	2	2	2	1	2	2	2	2	2	2	2	2	2	2	2	2	2	2	1								2	2	2
26	4	2020-06-14	2020-06-14	0	9	59	1	66.016		1			2	170	88	30.4498	2	2	2	2	1	2	1	2	1	2	2	2	2	2	2	2	2	2	2	2	2	2	2								9999	9999	9999
26	14	2020-06-14	2020-06-14	13.0833	14	60	1	56.916		2	1	27	2	160	114	44.5312	2	2	2	2	1	2	2	2	2	2	2	2	2	2	2	2	2	2	2	2	2	2	2								2	2	2
26	22	2020-06-20	2020-07-03	21.375	34	79	1	61.466		1			2	165	67	24.6097	2	1	2	2	2	2	1	2	9999	2	9999	9999	9999	9999	9999	2	2	2	2	2	2	2	9999								2	2	2
26	14	2020-07-18	2020-07-18	13.3333	18	64	2	48.776	2	1			2	156	112	46.0224	2	2	2	2	2	2	1	2	2	1	2	2	2	2	2	1	2	2	2	2	2	2	2	2020-03-11	55	0					1	2	2
26	9	2020-06-13	2020-06-13	0	9	44	1	55.096		2	1	3	2	158	58	23.2335	2	2	2	2	1	2	1	2	2	2	2	2	2	2	2	2	2	2	2	2	2	2	2								2	2	2
26	23	2020-07-31	2020-08-02	0	31	79	1	69.656		1			2	174	70	23.1206	2	1	2	2	2	2	2	1	1	2	2	2	2	2	2	2	2	2	2	2	2	2	2								2	2	1
26	6	2020-07-15	2020-07-14	0	8	44	1	38.716		1			2	140	100	51.0204	9999	9999	9999	9999	1	2	2	2	2	2	2	2	2	2	9999	2	2	2	9999	2	9999	9999	2								2	2	2
26	5	2020-05-22	2020-05-23	4.07153	5	43	1	66.016		2	1	18	2	170	70	24.2215	2	2	2	2	1	2	1	2	2	2	2	2	2	2	2	2	2	2	2	2	2	2	2								2	2	2
26	27	2020-06-21	2020-06-22	0	38	57	1	48.726		2	1	8	2	151	153	67.1023	2	2	2	2	1	2	2	1	1	2	2	2	2	2	2	2	2	2	2	2	2	2	2								2	2	2
26	11	2020-06-22	2020-06-22	0	16	45	1	64.196		2	1	1	2	168	78.7	27.8841	2	2	2	2	1	2	2	2	2	2	2	2	2	2	2	2	2	2	2	2	2	2	2								2	2	2
26	22	2020-08-06	2020-08-06	20.5833	22	77	2	46.046	2	1			2	153	86	36.738	9999	9999	9999	9999	1	2	1	1	2	2	2	2	2	2	2	2	2	2	2	2	2	2	2								2	1	1
26	13	2020-06-23	2020-06-25	-44005.1	13	55	1	51.456		1			2	154	88	37.1058	2	9999	9999	2	1	1	1	2	1	2	2	2	2	2	2	2	1	2	2	2	2	2	2								2	2	1
26	2	2020-07-16	2020-07-14	0	8	67	1	62.376		1			2	166	88	31.935	2	1	2	2	2	2	1	1	2	2	2	2	2	2	2	2	2	2	2	2	2	2	2								2	2	2
26	2	2020-05-28	2020-05-29	-43980.6	3	62	1	66.016		2	1	27	2	170	75	25.9516	2	2	2	2	1	9999	1	1	2	2	2	2	2	2	2	2	2	2	2	2	2	2	2								2	2	2
26	6	2020-05-26	2020-05-24	5.3125	6	59	1	60.556		2	1	7	2	164	86.5	32.1609	2	1	2	2	2	2	1	1	2	2	2	2	2	2	2	2	2	2	2	2	2	2	2										2
26	3	2020-07-11	2020-07-10	0	4	23	1	61.466		1			2	165	80	29.3848	2	2	2	2	1	2	2	2	2	2	2	2	2	2	2	2	2	2	2	2	2	2	2								2	2	2
26	9	2020-05-25	2020-05-26	2.43889	21	62	2	66.066	2	2	1		2	175	94	30.6939	2	2	2	2	1	2	2	1	2	2	2	2	2	2	2	2	2	2	2	2	2	2	2								2	2	2
26	3	2020-06-05	2020-06-05	0	14	85	2	47.866	2	1			2	155	75	31.2175	2	2	2	2	1	2	2	1	1	2	2	2	2	1	2	2	2	2	1	1	2	2	2	2019-06-08							1	2	2
26	10	2020-05-28	2020-05-30	0	17	34	1	64.196		2	1		2	168	100	35.4308	2	2	2	2	1	2	2	2	2	2	2	2	2	2	2	2	2	2	2	2	2	2	2								2	2	2
26	15	2020-06-27	2020-07-04	0	22	35	1	70.566		1			2	175	103	33.6327	2	2	2	2	1	2	2	2	2	2	1	1	1	2	2	2	2	2	2	2	2	2	2								2	2	2
26	2	2020-07-03	2020-07-03	0	4	52	1	63.286		1			2	167	90	32.2708	2	2	2	2	1	2	2	1	2	2	2	2	2	2	2	2	2	2	2	2	2	2	2								2	2	2
26	10	2020-06-13	2020-06-14	-43996.1	16	35	2	61.516	2	2	1	11	2	170	95	32.872	2	2	2	2	1	1	2	2	2	2	2	2	1	2	2	2	2	2	2	2	2	2	2								2	2	2
26	7	2020-07-11	2020-07-16	-44030.5	11	37	1	62.376		1			2	166	85	30.8463	2	2	2	2	1	2	1	1	2	2	2	2	1	2	2	2	2	2	2	2	2	2	2	2020-07-29							2	2	1
26	10	2020-05-19	2020-05-24	15.7257	18	63	1	66.016		1			2	170	70	24.2215	2	2	2	2	1	2	1	1	2	2	2	2	2	2	2	2	2	2	2	2	2	2	2	2020-06-14							2	2	2
26	4	2020-07-28	2020-07-28	0	6	31	1	70.566		2	1		2	175	95	31.0204	2	2	2	2	1	2	2	2	2	2	2	2	2	2	2	2	2	2	2	2	2	2	2								2	2	2
26	2	2020-04-22	2020-05-24	125.958	10	66	2	47.866	2	1			2	155	54.5	22.6847	2	2	2	2	1	2	1	1	2	2	2	2	2	2	2	1	2	2	2	2	2	2	2								2	1	2
26	1	2020-08-29	2020-08-29	0	1	67	2	52.416	2	1			2	160	80	31.25	2	2	2	2	1	2	2	1	1	2	2	2	2	2	2	2	2	2	2	2	2	2	2								1	1	1
26	11	2020-05-24	2020-05-24	0	24	41	1	64.196		2	1	3	2	168	85	30.1162	2	2	2	2	1	9999	1	2	2	2	2	2	2	2	2	2	2	2	2	2	2	2	2								2	2	2
26	10	2020-05-25	2020-05-25	-43886.9	10	50	1	67.836		2	1	3	2	172	80	27.0416	2	2	2	2	1	2	2	2	2	2	2	9999	2	2	2	2	2	2	2	2	2	2	9999								9999	9999	9999
26	26	2020-05-24	2020-05-20	-43981	20	60	2	48.776	2	1			2	156	98	40.2696	2	2	2	2	1	9999	2	2	2	2	2	2	2	2	2	2	2	2	2	2	2	2	2								2	2	2
26	7	2020-06-21	2020-06-21	0	14	53	1	61.466		2	1	18	2	165	75	27.5482	2	2	2	2	1	9999	2	2	2	2	2	2	2	2	2	2	2	2	2	2	2	2	2								2	2	2
26	15	2020-06-07	2020-06-05	-154.469	23	30	2	49.686	1	2	1		2	157	80	32.4557	2	2	2	2	1	2	2	2	2	2	2	2	2	2	2	2	2	2	2	2	2	2	2								2	2	2
26	10	2020-07-10	2020-07-11	-44144	17	95	1	66.016		1			2	170	72	24.9135	2	1	2	2	1	2	1	1	1	2	2	2	2	2	2	2	2	2	2	2	2	2	2								2	2	2
26	27	2020-05-27	2020-05-27	-139.303	30	59	1	59.646		1			2	163	102	38.3906	2	2	2	2	1	2	1	2	2	2	2	2	2	2	2	2	2	2	2	2	2	2	2	2017-10-01							2	2	2
26	5	2020-08-07	2020-08-07	0	32	88	2	54.236	2	1			2	162	90	34.2936	9999	1	9999	9999	9999	2	2	2	2	2	1	2	2	2	2	2	2	2	2	2	2	2	2								9999	2	2
26	2	2020-05-23	2020-05-25	-44144.7	3	36	1	67.836		2	1	7	2	172	144	48.675	2	2	2	2	1	2	1	2	2	2	2	2	2	2	2	2	2	2	2	2	2	2	2								2	2	2
26	10	2020-07-29	2020-06-24	6.75417	12	72	1	63.286		2	1	6	2	167	64	22.9481	9999	9999	9999	9999	1	9999	2	2	1	2	2	2	2	2	2	2	2	2	2	2	2	2	2								2	2	2
26	19	2020-06-23	2020-06-23	-120.542	19	61	1	74.206		2	1	7	1	179	88	27.4648	2	2	2	2	1	2	1	2	2	2	2	2	2	2	2	2	2	2	2	2	2	2	2								2	2	2
26	7	2020-07-11	2020-07-10	-44144.1	7	76	1	66.016		1			1	170	75	25.9516	2	2	2	2	1	2	1	1	2	2	2	2	2	2	2	2	2	2	2	2	2	2	2	2020-06-30	60	0					2	2	1
26	2	2020-06-04	2020-06-06	0	7	92	1	59.646		1			2	163	53	19.9481	2	2	2	2	1	2	1	1	1	2	2	2	2	1	2	2	2	2	2	2	2	2	1	2020-04-28	55	1					1	2	2
26	5	2020-06-02	2020-06-05	0	15	31	1	60.556		2	1	1	2	164	93.53	34.7747	2	2	2	2	1	2	2	2	2	2	2	2	1	2	2	2	2	2	2	2	2	2	2								2	2	2
26	5	2020-06-06	2020-06-06	4.43611	5	49	1	55.096		2	1		2	158	62	24.8358	2	2	2	2	1	2	2	2	2	2	2	2	2	2	2	2	2	2	2	2	2	2	2								2	2
26	10	2020-06-20	2020-06-20	8.83333	10	42	1	43.266		2	1		2	145	90	42.8062	2	2	2	2	1	2	1	2	2	2	2	2	2	2	2	2	2	2	2	2	2	2	2								2	2	2
26	2	2020-06-11	2020-06-11	0.708333	2		1	59.646		2	1		2	163	80	30.1103	2	2	2	2	1	2	1	1	2	2	2	2	2	2	2	2	2	2	2	2	2	2	2								2	2	2
26	13	2020-06-24	2020-06-24	-44006.1	13	59	1	45.996		2			2	148	67	30.588	2	2	2	2	2	2	2	1	1	1	2	2	2	2	2	2	2	2	2	2	2	2	2	2020-09-29	60						2	2	1
26	13	2020-06-11	2020-06-11	11.75	13		2	76.076	2	1			2	186	85	24.5693	2	2	2	2	1	2	1	1	2	2	2	2	2	2	2	2	2	2	2	2	2	2	2								2	2	1
26	45	2020-07-12	2020-06-22	0	78	52	1	73.296		2	1	13	2	178	117	36.9272	9999	9999	9999	9999	1	2	2	2	2	2	2	2	2	2	2	2	2	2	2	2	2	2	2								2	2	2
26	11	2020-06-25	2020-06-27	1.38264	31	69	1	61.466		2	1	10	2	165	117	42.9752	9999	9999	9999	9999	1	9999	1	1	2	2	2	2	2	2	2	2	2	2	2	2	2	2	2								2	1	1
26	6	2020-07-04	2020-07-04	0	11	58	1	66.016		2	1	5	2	170	81	28.0277	2	1	2	2	2	2	1	2	2	2	2	2	2	2	2	2	2	2	2	2	2	2	2								2	2	2
26	2	2020-08-08	2020-08-08	0	8	50	1	70.566		1			2	175	95	31.0204	9999	9999	9999	9999	1	2	1	1	2	2	2	2	2	2	2	2	2	2	2	2	2	2	2								9999	9999	9999
26	8	2020-06-20	2020-06-20	6.60417	8	46	1	61.466		2		18	2	165	75	27.5482	9999	9999	9999	9999	1	2	2	2	2	2	2	2	2	2	2	2	2	2	2	2	2	2	2								2	2	2
26	13	2020-06-12	2020-06-11	3.97917	13	58	1	64.196		1			2	168	85	30.1162	2	9999	9999	2	1	2	1	1	1	1	2	2	2	2	2	2	2	9999	9999	9999	9999	9999	2								2	1	2
25	7	2020-06-23	2020-06-23	0	7	35	1	65.106		1			2	169	103	36.0632	9999	9999	9999	9999	9999	2	2	2	2	9999	2	2	2	2	2	9999	9999	9999	2	2	2	2	2								9999	9999	9999
25	11	2020-05-31	2020-05-31	-43983.5	11	68	2	58.786	2	2		5		167	107	38.3664	9999	9999	9999	9999	9999	2	1	2	2	2	2	2	2	2	2	2	2	2	2	2	2	2	2								2	2	2
25	16	2020-05-26	2020-05-26	-44130.8	16	68	2		2	1			2				2	9999	2	1		2	1	1	9999	2	2	2	2	2	2	2	2	2	2	2	2	2	2								2	2	2
25	45	2020-06-13	2020-06-02	-43995.4	68	55	2	47.866		1			2	155	82	34.1311	9999	9999	9999	9999	9999	2	1	1	1	2	9999	9999	2	2	2	2	2	2	2	2	2	1	2								9999	2	2
25	15	2020-08-06	2020-08-07	11.375	14	62	1	56.916		1			2	160	68	26.5625	2	1	2	2	2	1	1	1	2	2	2	2	2	2	9999	2	2	2	2	2	2	2	2								2	2	2
25	13	2020-06-11	2020-05-25	7.25	33	60	1	66.016		2	1	2	2	170	78	26.9896	2	9999	9999	2	1	2	2	2	2	2	2	2	2	2	2	2	2	2	2	2	2	2	2								2	2	2
25	3	2020-08-04	2020-08-16	0	14	74	2	50.596	2	1			2	158	97	38.856	2	9999	9999	2	1	2	1	1	2	2	1	2	2	2	2	2	2	2	2	2	2	1	2	2014-09-23	72	0	4				2	1	2
25	12	2020-07-02	2020-07-01	0	16	56	1	78.756		2	1	10	2	184	81	23.9249	2	9999	9999	2	1	9999	1	2	2	2	2	2	2	2	2	2	2	2	2	2	2	2	2								2	2	2
25	2	2020-07-21	2020-07-21	0	7	43	1	66.016		2	1	3	2	170	90	31.1419	2	1	2	2	2	2	2	2	2	2	2	2	2	2	2	2	2	2	2	2	2	2	2								2	2	2
25	12	2020-09-18	2020-09-18	-0.845139	17	64	2	47.866	2	1			2	155	125	52.0291	2	1	2	2	2	2	1	1	2	2	2	2	2	2	2	2	2	2	2	2	2	2	2								9999	9999	9999
25	5	2020-07-10	2020-07-10	0	10	46	1	61.466		2	1	1		165	90	33.0579	2	9999	9999	2	1	9999	1	1	2	2	2	2	2	2	2	2	2	2	2	2	2	2	2								1	2	2
25	12	2020-06-23	2020-06-27	0	33	38	1	60.556		2	1	1	2	164	89	33.0904	2	9999	9999	2	1	2	1	2	2	2	2	2	2	2	2	2	2	2	2	2	2	2	2								2	2	2
25	22	2020-07-08	2020-07-11	0	44	42	1	65.106		2	1	9	2	169	80	28.0102	2	9999	9999	2	1	2	1	1	2	2	2	2	2	2	1	2	2	2	2	2	2	2	2								1	2	2
25	3	2020-07-10	2020-07-12	0	10	59	1	54.186		2	1	7	2	157	65	26.3702	2	9999	9999	2	1	9999	1	1	2	2	2	2	2	2	2	2	2	2	2	2	2	2	2								2	1	2
25	5	2020-05-31	2020-05-31	6.02708	7	33	1	68.746		2	1	1	2	173	100	33.4124	2	9999	9999	2	1	2	2	2	2	2	2	2	2	2	2	2	2	2	2	2	2	2	2								2	2	2
25	5	2020-05-25	2020-05-27	4.04167	5	40	1	66.016		2	1	11	2	170	95	32.872	9999	9999	9999	2	1	2	2	2	2	2	2	2	2	2	2	2	2	2	2	2	2	2	2								2	2	2
25	4	2020-07-10	2020-07-20	0	13	46	1	70.566		2	1	1	2	175	67	21.8776					1	2	2	2	2	2	2	2	2	2	2	2	2	2	2	2	2	2	2								2	2	2
25	4	2020-07-08	2020-07-15	0	17	41	2	52.416	2	2		2	2	160	84	32.8125					1	2	2	2	2	2	2	2	2	2	2	2	2	2	2	2	2	2	2								2	2	2
25	1	2020-07-16	2020-07-27	-44034.8	12	71	1	70.566		2		5	2	175	78	25.4694					1	2	1	1	2	2	2	2	2	2	2	2	2	2	2	2	2	2									9999	9999	9999
25	13	2020-07-18	2020-07-17	0	6	70	1	56.916		1			2	160	118	46.0938					1		1	1	2	2	2	2	2	2	2	2	2	2	2	2	2	2	2								9999	9999	9999
25	1	2020-07-12	2020-07-16	0	1	77	1	70.566		1			2	175	85	27.7551		1				2	1	1	2	1	2	2	2	2	2	1	2	2	2	2	2	2	2								2	2	2
25	6	2020-07-15	2020-07-16	0	10	40	1	60.556		2	1	11		164	92	34.2058	2	2	2	2	2	2	2	2	2	2	2	2	2	2	2	2	2	2	2	2	2	2	2								2	2	2
25	18	2020-06-01	2020-06-10	17.5049	18	50	1	58.736		1			2	162	75	28.578					1	2	2	2	2	2	2	2	2	2	2	2	2	2	2	2	2	2	2	2013-10-28	75	0					2	2	2
25	11	2020-06-04	2020-06-04	9.33333	26	38	1	71.476		2	1	3	2	176	68	21.9525	9999	9999	9999	2	1	9999	2	2	2	2	2	2	2	2	2	2	2	2	2	2	2	2	2								2	2	2
25	11	2020-06-04	2020-06-08	10.9583	15	62	1	57.826		2	1	5	2	161	78	30.0914	9999	9999	9999	2	1	2	2	2	2	2	2	2	2	2	2	2	2	2	2	2	2	2	2								2	2	2
25	4	2020-08-15	2020-08-24	0	11	49	1	58.736		1			2	162	95	36.1988	9999	9999	9999	2	1	9999	2	2	2	2	2	2	2	2	2	2	2	2	2	2	2	2	2								9999	2	2
25	20	2020-06-18	2020-06-18	0	28	73	1	61.466		2	1	9	2	165	85	31.2213	2	1	2	2	2	2	2	2	2	2	2	2	1	2	2	2	2	2	2	2	2	2	2								2	2	2
25	6	2020-06-23	2020-06-26	0	11	33	2	46.956	2	2	1	8	2	154	85	35.8408	2	9999	9999	2	1	2	2	2	2	2	2	2	2	2	2	2	2	2	2	2	2	2	2								2	2	2
25	17	2020-06-08	2020-06-10	10.0153	19	65	1	67.836		2	1	7	2	172	70	23.6614	2	9999	9999	2	1	2	1	1	1	2	2	2	2	2	2	2	1	2	2	2	2	2	2	2020-06-09	70	0					2	1	1
25	1	2020-06-02	2020-06-02	0	6	68	2	56.966	2	2	1	9	2	165	110	40.404	2	9999	9999	2	1	2	2	1	2	2	2	2	2	2	2	2	2	2	2	2	2	2	2								2	2	2
25	15	2020-05-27	2020-05-21	8.30556	15	74	1	61.466		1			2	165	70	25.7117	2	2	2	2	1	2	1	1	1	2	2	2	2	2	2	2	2	2	2	2	2	2	2								2	2	1
25	10	2020-06-04	2020-06-04	0	25	65	1	76.936		1			2	182	95	28.6801	2	2	2	2	1	2	2	2	2	2	2	2	2	2	2	2	2	2	2	2	2	2	2	2020-06-07	69	0					2	2	2
25	11	2020-05-28	2020-05-27	10.5	11	42	1	61.466		2	1	1	2	165	70	25.7117	2	9999	9999	2	1	2	2	2	2	2	2	2	2	2	2	2	2	2	2	2	2	2	2								2	2	2
25	11	2020-08-11	2020-08-11	0	26	59	1	68.746		1			2	173	90	30.0712	2	9999	9999	2	1	2	1	1	2	2	2	2	2	2	2	2	2	2	2	2	2	2	2								2	2	2
25	3	2020-06-19	2020-06-28	0	22	45	1	77.846		2	1	6	2	183	70	20.9024	2	9999	9999	2	1	2	2	2	2	2	2	2	2	2	2	2	2	2	2	2	2	2	2								2	2	2
25	13	2020-06-21	2020-07-01	5.5	18	64	2	52.416	2	1			2	160	91	35.5469	2	9999	9999	2	1	2	2	1	2	2	2	2	2	2	2	2	2	2	2	2	2	2	2								2	2	2
25	17	2020-07-06	2020-07-10	14.5	19	72	1	72.386		2	1	10	2	177	98	31.2809	2	9999	9999	2	1	2	1	1	1	2	2	2	2	2	2	2	2	2	2	2	2	2	2								2	1	1
24	16	2020-06-17	2020-06-21	9.07639	24	60	1	71.476		1			2	176	80	25.8264	2	9999	9999	2	1	2	2	2	2	2	2	2	2	2	2	2	2	2	2	2	2	2	2								2	2	2
24	22	2020-06-19	2020-06-20	0.590278	22	41	1	47.816		2	1	2	2	150	68	30.2222	2	9999	9999	2	1	9999	1	9999	2	2	2	2	2	2	2	9999	2	2	2	2	2	2	2								9999	9999	9999
25	22	2020-05-31	2020-05-31	21.2083	22	60	1	75.116		2	1	6	2	180	95	29.321	2	9999		9999	1	2	2	2	2	2	2	2	2	2	2	2	2	2	2	2	2	2	2								2	2	2
24	4	2020-06-16	2020-06-16	0	3	47	1	62.376		2	1	1	2	166	75	27.2173	2	9999	9999	2	1	2	2	2	2	2	2	2	2	2	2	2	2	2	2	2	2	2	2								2	2	2
25	26	2020-06-07	2020-06-11	17.375	33	60	1	66.926		2	1	7	2	171	80	27.3588	2	9999	9999	2	1	2	1	1	2	2	2	2	2	2	2	2	2	2	2	2	2	2	2								9999	9999	9999
24	1	2020-06-16	2020-06-16	0	9	35	2	46.956	2	1			2	154	55	23.1911	2	9999	9999	2	1	2	1	2	2	2	2	2	2	2	2	2	2	2	2	2	2	2	2								2	2	2
24	26	2020-06-21	2020-06-21	10.9792	26	66	1	57.826		1			2	161	80	30.863	2	9999	9999	2	1	2	2	1	2	2	2	2	2	2	2	2	2	2	2	2	2	2	2								9999	9999	2
24	14	2020-06-19	2020-06-19	9.97917	14	66	1	70.566		1			2	175	80	26.1224	2	1	2	2	2	2	1	1	2	2	2	2	2	2	2	1	2	2	2	2	2	2	2								9999	9999	9999
24	12	2020-06-22	2020-06-22	0	21	65	1	79.666		2	1	6	2	185	75	21.9138	2	2	2	2	1	2	1	2	2	2	2	2	2	2	2	2	2	2	2	2	2	2	2								2	2	2
24	4	2020-06-16	2020-06-20	0	17	65	2	56.966	2	1			2	165	87	31.9559	2	9999	2	2	1	2	1	2	2	2	2	2	2	2	2	2	2	2	2	2	2	2	2								2	2	2
24	12	2020-06-24	2020-06-24	0	18	62	1	70.566		2	1	8	2	175	80	26.1224	2	9999	9999	2	1	9999	1	1	2	2	2	2	2	2	2	2	2	2	2	2	2	2	2								9999	9999	9999
25	6	2020-06-22	2020-07-05	0	13	44	1	64.196		2	1	7	2	168	89	31.5334	2	1	2	2	2	2	2	2	2	2	2	2	2	2	2	2	2	2	2	2	2	2	2								2	2	2
25	1	2020-07-02	2020-07-08	0	7	47	1	66.016		1			2	170	92	31.8339	2	2	2	2	1	2	2	2	2	2	2	2	2	2	2	2	2	2	2	2	2	2	2								2	2	2
25	8	2020-06-06	2020-06-06	0	23	37	1	61.466		2	1	3	1	165	101	37.0983	2	2	2	2	1	2	2	2	2	2	2	2	2	2	2	2	2	2	2	2	2	2	2								2	2	2
25	5	2020-06-27	2020-06-29	0	5	74	2	54.236	2	1			2	162	45	17.1468	2	9999	2	2	1	2	1	1	2	2	2	2	2	2	2	2	2	2	2	2	2	2	2								2	1	1
25	2	2020-06-26	2020-07-09	0	9	54	1	70.566		1			2	175	76	24.8163	2	2	2	2	1	2	2	2	2	2	2	2	2	2	2	2	2	2	2	2	2	2	2								2	2	2
25	2	2020-07-09	2020-07-09	0	9	65	1	66.016		2	1	1	2	170	65	22.4913	2	2	2	2	1	2	1	1	2	2	2	2	2	2	2	2	2	2	2	2	2	2	2								9999	9999	9999
25	12	2020-06-21	2020-06-23	4.58194	14	67	1	64.196		2	1	10	2	168	85	30.1162	2	1	2	2	2	2	1	1	2	2	2	2	2	2	2	1	2	2	2	2	2	1	2								2	2	1
25	21	2020-07-05	2020-07-07	20.0632	23	87	1	66.016		1			2	170	69	23.8754	2	2	2	2	1	2	1	1	2	1	2	2	2	2	2	2	2	2	2	2	2	2	2								2	2	1
25	5	2020-07-01	2020-07-04	0	27	41	1	66.016		2	1	3	2	170	81	28.0277	2	2	2	2	1	2	2	2	2	2	2	2	2	2	2	2	2	2	2	2	2	2	2								2	2	2
25	1	2020-05-29	2020-06-07	0	24	29	2	61.516	2	2	1	3	2	170	88	30.4498	2	2	2	2	1	2	2	2	2	2	2	2	2	2	2	2	2	2	2	2	2	2	2								2	2	2
25	4	2020-06-09	2020-06-16	10.5	4	34	1	66.016		2	1	1	2	170	66	22.8374	2	1	2	2	2	2	2	2	2	2	2	2	2	2	2	2	2	2	2	2	2	2	2								2	2	2
25	1	2020-06-06	2020-06-15	7.5	1	57	2	47.866	2	1			2	155	90	37.461	2		2	2	1	2	2	1	2	2	2	2	2	2	2	2	2	2	2	2	2	2	2								2	2	2
25	5	2020-06-08	2020-06-16	9.20833	13	46	1	76.026		2	1	6	2	181	106	32.3555	9999	9999	9999	9999	1	9999	1	1	1	2	2	2	2	2	2	2	2	2	2	2	2	2	2								2	2	1
25	1	2020-06-06	2020-06-17	0	9	45	1	73.296		2	1	9	2	178	127	40.0833	9999	9999	9999	9999	1	2	2	2	2	2	2	2	2	2	2	2	2	2	2	2	2	2	2								2	2	2
25	11	2020-10-03	2020-10-15	0	14	42	1	80.576		1			2	186	112	32.3737	9999	9999	9999	9999	1	9999	2	2	2	2	2	2	2	2	2	2	2	2	2	2	2	2	2								2	2	2
25	9	2020-10-21	2020-10-23	0	14	59	2	44.226	2	1			2	151	106	46.4892	9999	9999	9999	9999	1	2	2	2	2	2	2	2	2	2	2	2	2	2	2	2	2	2	2								2	2	2
25	11	2020-06-06	2020-06-06	6.41667	18	45	2	56.056	2	2	1	10	2	164	95	35.3212	9999	1	9999	9999	2	2	2	2	2	2	2	2	2	2	2	2	2	2	2	2	2	2	2								2	2	2
25	1	2020-07-06	2020-07-06	0	13	48	1	61.466		2	1	1	2	165	77	28.2828	2	2	2	2	1	1	1	2	2	2	2	2	2	2	2	2	2	2	2	2	2	2	2								2	2	2
25	1	2020-06-18	2020-06-20	0	12	53	1	56.916		2	1	19	2	160	75	29.2969	2	2	2	2	1	2	2	2	2	2	2	2	2	2	2	2	2	2	2	2	2	2	2								2	2	2
25	1	2020-09-16	2020-09-23	0	10	60	1	66.016		1			2	170	62	21.4533	2	1	2	2	2	2	1	2	2	2	2	2	2	2	2	2	2	2	2	2	2	2	2								2	2	2
25	2	2020-06-21	2020-06-21	0	13	64	1	70.566		1			2	175	130	42.449	2	2	2		1	2	1	1	2	2	2	2	2	2	2	2	2	2	2	2	2	2	2								2	1	1
25	4	2020-06-21	2020-06-21	0	27	50	1	68.746		2	1	3	2	173	75	25.0593	2	1	2	2	2	2	2	2	2	2	2	2	2	2	2	2	2	2	2	2	2	2	2								2	2	2
25	1	2020-06-15	2020-06-23	0	18	59	1	73.296		1			2	178	95	29.9836	2	1	2	2	2	2	2	2	2	2	2	2	2	2	2	2	2	2	2	2	2	2	2								2	2	2
25	13	2020-06-06	2020-06-06	6.89514	47	53	1	63.286		2	1	2	1	167	76	27.2509	2	2	2	2	1	2	1	1	2	2	2	2	2	2	2	2	2	2	2	2	2	2	2								1	2	2
25	25	2020-06-04	2020-06-15	28.2285	36	92	2	40.586	2	1			2	147	43	19.8991	2	2	2	2	1	2	1	1	1	2	2	2	2	2	2	2	2	2	2	2	2	2	2								2	2	1
25	6	2020-06-07	2020-06-07	2.75	7	36	1	66.016		2	1	9	2	170	157	54.3253	2	2	2	2	1	2	2	2	2	2	2	2	2	2	2	2	2	2	2	2	2	2	2								2	2	2
25	12	2020-06-12	2020-06-23	10.4417	12	63	2	56.966	2	1			2	165	65	23.8751	2	2	2	2	1	2	2	2	2	2	2	2	2	2	2	2	2	2	2	2	2	2	2								2	2	2
25	17	2020-06-16	2020-06-20	13.8333	24	59	1	63.286		2	1	11	2	167	80	28.6851	2	2	2	2	1	2	2	2	2	2	2	2	2	1	2	2	2	2	2	2	2	2	2								2	2	2
25	47	2020-07-31	2020-08-01	18.5	48	52	1	70.566		2	1	2	2	175	60	19.5918	9999	9999	9999	9999	1	2	2	2	2	2	2	2	2	2	2	2	2	2	2	2	2	2	2								2	2	2
25	14	2020-06-08	2020-06-11	10.7083	14	67	1	70.566		2	1	11	2	175	100	32.6531	9999	9999	9999	9999	1	2	1	1	9999	9999	2	2	2	2	2	2	2	2	2	2	2	2	9999								9999	9999	9999
25	6	2020-06-14	2020-06-18	0	15	47	1	68.746		1			2	173	150	50.1186	9999	9999	9999	9999	1	9999	2	1	1	2	2	2	2	2	2	2	2	2	2	2	2	2	2	2013-12-10	52	0	4				9999	9999	9999
25	12	2020-06-14	2020-06-18	0	12	85	1	56.916		2	1	6	2	160	80	31.25	9999	9999	9999	9999	1	2	2	2	2	2	2	2	2	2	2	2	2	2	2	2	2	2	2								2	2	2
25	4	2020-06-18	2020-06-18	0	28	73	1	64.196		2	1	9	2	168	75	26.5731	2	1	2	2	2	2	2	2	2	2	2	2	1	2	2	2	2	2	2	2	2	2	2								2	2	2
25	31	2020-06-18	2020-06-25	0	81	58	1	73.296		1			2	178	85	26.8274	2	2	2	2	1	2	1	1	2	2	2	2	2	2	2	2	2	2	2	2	2	2	2								2	1	2
25	3	2020-06-05	2020-06-05	2.58333	5	36	1	58.736		2	1		2	162	121	46.1058	2	2	2	2	1	2	2	2	2	2	2	2	2	2	2	2	2	2	2	2	2	2	2								2	2	2
25	12	2020-05-25	2020-05-25	6.24792	34	61	1	70.566		2	1	6	2	175	70	22.8571	2	2	2	2	1	2	1	2	2	2	2	2	2	2	2	2	2	2	2	2	2	2	2								2	2	2
25	8	2020-06-03	2020-06-03	5.91389	8	37	1	56.916		2	1	3	2	160	69	26.9531	2	2	2	2	1	2	2	2	2	2	2	2	2	2	2	2	2	2	2	2	2	2	2								2	2	2
25	4	2020-06-01	2020-06-01	3.95625	4	54	1	75.116		2	1	6	2	180	130	40.1235	2	2	2	2	1	2	2	1	2	2	2	2	2	2	2	2	2	2	2	2	2	2	2	2013-11-24	75	0					2	1	2
25	9	2020-06-06	2020-06-08	9	11	51	1	55.096		2	2		2	158	70	28.0404	2	1	2	2	2	2	2	2	2	2	2	2	2	2	2	2	2	2	2	2	2	2	2								2	2	2
25	13	2020-06-04	2020-06-07	12	16	62	1	70.566		2	1	5	2	175	85	27.7551	9999	9999	9999	9999	1	2	2	2	2	2	2	2	2	2	2	2	2	2	2	2	2	2	2								2	2	2
25	7	2020-05-28	2020-05-28	6.375	7	52	1	56.916		2	1		2	160	80	31.25	9999	9999	9999	9999	1	2	2	2	2	2	2	2	2	2	2	2	2	2	2	2	2	2	2								2	2	2
3	28	2020-04-15	2020-04-14	27.2222	28	52	1	56.916		2		5	2	160	119	46.4844	9999	9999	9999	9999	9999	9999	1	1	9999	9999	9999	9999	9999	9999	9999	2	1	9999	9999	9999	2	2	9999								9999	9999	9999
28	38	2020-05-29	2020-05-29	33.5	42	22	2	78.806	2	1			2	189	112	31.3541	2	9999	2	2	1	2	2	2	2	2	2	2	2	2	2	2	2	2	2	2	2	2	2								2	2	2
28	95	2020-07-26	2020-07-25	91.5049	34	38	2	56.056	1	1			1	164	72	26.7698	9999	9999	9999	9999	1	2	2	2	2	2	2	2	2	2	2	2	2	2	2	2	2	2	2								2	2	2
28	18	2020-06-24	2020-06-22	18.5	18	52	2	55.146	2	1			2	163	88	33.1213	2	2	2	2	1	2	1	2	2	2	2	2	2	2	2	2	2	2	1	2	2	2	2								2	2	2
28	47	2020-08-06	2020-08-06	40	48	50	1	56.916		2	1	5	1	160	68	26.5625	9999	9999	9999	9999	1	1	1	2	2	2	2	2	1	2	2	2	2	2	2	2	2	2	2								9999	9999	9999
28	23	2020-09-15	2020-09-14	13.5	24	45	1	66.016		1			2	170	86	29.7578	2	1	2	2	2	9999	2	2	2	2	2	2	2	2	2	2	2	2	2	2	2	2	2								9999	9999	9999
28	18	2020-08-25	2020-08-23	18.5	18	35	2	52.416	2	2	1	1	1	160	85	33.2031	9999	9999	9999	9999	1	2	2	2	2	2	2	2	2	2	2	2	2	2	2	2	2	2	1								9999	9999	9999
28		2020-07-15		21.6208	44	51	1	56.916		1			2	160	107	41.7969	9999	9999	9999	9999	1	2	1	2	2	2	9999	9999	9999	9999	9999	9999	9999	9999	9999	9999	9999	9999	9999								9999	9999	9999
4	16	2020-05-27	2020-06-02	8.775	35	63	1	61.466		1			2	165	100	36.7309	2	2	1	2	2	2	1	2	2	2	2	2	2	2	2	2	2	2	2	2	2	2	2								2	1	1
4	11	2020-06-18	2020-06-18	0	13	61	1	65.106		1			2	169	88	30.8112	2	2	2	2	1	9999	1	1	1	1	2	2	2	2	2	2	2	2	2	2	2	2	2	2011-11-12	30	0	2		35		2	2	1
4	13	2020-07-17	2020-08-05	10.5299	17	44	1	66.016		1			2	170	130	44.9827	2	1	2	1	2	2	2	1	2	2	2	2	2	2	2	1	2	2	1	2	2	1	1								2	2	2
4	5	2020-08-29	2020-09-06	0	22	56	1	61.466		1			2	165	75	27.5482	9999	9999	9999	9999	1	2	1	2	2	2	2	2	2	2	2	2	2	2	2	2	2	2	2								2	2	2
4	33	2020-08-16	2020-08-27	29.3958	33	18	1	58.736		1			1	162	58	22.1003	2	2	2	2	1	2	2	2	2	2	2	2	2	2	2	2	2	2	2	2	2	1	2								2	2	2
4	28	2020-07-22	2020-07-30	27.75	29	64	2	43.316	2	1			2	150	75	33.3333	2	2	2	2	1	2	1	2	2	2	2	2	1	2	2	2	2	2	2	2	2	2	2								2	2	2
4	9	2020-06-16	2020-06-18	1.45833	17	47	1	61.466		1			2	165	80	29.3848	2	2	2	2	1	2	2	2	2	2	2	2	2	2	2	1	2	2	2	1	2	2	2								2	2	2
4	16	2020-06-03	2020-06-02	6.5	24	47	1	56.916		1			1	160	79	30.8594	2	9999	9999	2	1	2	2	2	2	2	2	2	2	2	2	2	2	2	2	2	2	2	2								2	2	2
4	4	2020-07-25	2020-08-01	0	9	43	2	54.236	2	1			1	162	78	29.7211	9999	9999	9999	2	1	2	2	2	2	2	2	2	2	2	2	2	2	2	2	2	2	2	2								2	2	2
4	31	2020-05-26	2020-06-02	12.375	35	36	1	64.196		1			2	168	85	30.1162	2	1	9999	2	2	2	1	2	2	2	2	2	2	2	2	2	2	2	2	2	2	2	2								2	2	2
4	6	2020-05-30	2020-06-02	2.61458	11	38	2	48.776	2	1			2	156	90	36.9822	2	9999	9999	2	1	2	2	1	2	2	2	2	1	2	2	2	2	2	2	2	2	2	2								2	1	2
4	5	2020-06-08	2020-06-18	1.44236	24	60	2	43.316	2	1			2	150	70	31.1111	2	1	2	2	2	2	2	2	2	2	2	2	1	2	2	2	2	2	2	2	2	2	2								2	2	2
4	15	2020-08-01	2020-08-02	0	22	46	1	66.016		1			1	170	90	31.1419	9999	1	9999	2	2	2	1	2	2	2	2	2	2	2	2	2	2	2	2	2	2	2	2								2	2	2
4	14	2020-06-04	2020-06-11	12.5757	14	56	2	47.866	2	1			2	155	75	31.2175	2	2	1	2	2	2	2	1	2	2	2	2	2	2	2	2	2	2	2	2	2	2	2								2	2	1
4	21	2020-09-10	2020-09-10	11.5	51	57	2	34.216	2	1			2	140	55	28.0612	2	2	2	1	2	2	1	1	2	2	2	2	2	2	2	1	1	2	2	2	2	2	2								2	2	2
4	8	2020-06-01	2020-06-02	0	21	46	1	62.376		1			2	166	85	30.8463	2	9999	9999	2	1	2	2	2	2	2	2	2	2	2	2	2	2	2	2	2	2	2	2								2	2	2
4	10	2020-08-18	2020-09-11	0	29	81	1	61.466		1			2	165	90	33.0579	2	2	2	2	1	2	1	1	2	2	2	2	2	2	2	2	2	2	1	2	2	1	2								1	2	1
4	10	2020-06-16	2020-06-19	0	15	53	1	56.916		1			2	160	80	31.25	2	2	2	2	1	2	1	2	2	2	2	2	2	2	2	1	2	2	2	2	2	2	2								2	2	2
4	12	2020-06-01	2020-06-03	0	20	81	1	49.636		1			2	152	56	24.2382	2	9999	9999	2	1	2	1	1	2	2	2	2	2	2	2	2	2	2	2	2	2	2	2								1	2	2
4	7	2020-08-01	2020-08-02	0	9	42	1	66.016		1			1	170	75	25.9516	2	1	9999	2	2	2	2	2	2	2	2	2	2	2	2	2	2	2	2	2	2	2	2								2	2	2
4	23	2020-08-22	2020-09-04	22.5	23	61	2	56.966	2	1			2	165	80	29.3848	2	9999	9999	2	1	9999	1	1	1	2	2	2	1	2	2	2	2	2	2	2	2	2	1	2020-07-19	60	0	2		55		2	2	1
4	21	2020-06-15	2020-06-19	6.66667	35	62	2	54.236	2	1			2	162	72	27.4348	2	2	2	2	1	2	1	2	2	2	2	2	1	2	2	2	2	2	2	2	2	2	2								2	2	2
4	2	2020-06-02	2020-06-04	0	6		1	60.556		1			2	164	95	35.3212	2	9999	9999	2	1	2	1	1	2	2	2	2	2	2	2	2	2	2	2	2	2	2	2								2	2	2
4	12	2020-08-30	2020-09-10	11.4083	23	42	2	63.336	2	1			2	172	90	30.4218	2	1	2	2	2	2	1	1	1	2	2	2	2	2	2	2	2	2	2	2	2	2	2								2	2	1
4	15	2020-07-21	2020-08-02	0	67	64	1	69.656		1			1	174	65	21.4692	2	2	2	1	2	2	2	1	2	2	2	2	2	1	2	2	2	1	1	2	2	2	1								1	2	2
4	5	2020-06-25	2020-06-27	21.5	28	35	2	43.316	2	1			2	150	122	54.2222	2	2	2	1	2	2	2	2	2	2	2	2	2	2	2	2	2	2	2	2	2	2	1								2	2	2
4	17	2020-06-12	2020-08-10	13.5	30	55	1	60.556		1			2	164	62	23.0518	9999	9999	9999	9999	1	2	2	2	2	2	2	2	2	2	2	1	2	2	1	2	2	1	2								2	2	2
4	13	2020-08-15	2020-09-03	0	13	85	1	66.016		1			2	170	93	32.1799	2	2	2	1	2	9999	1	1	2	2	9999	2	2	2	9999	2	2	2	2	2	2	2	2								9999	9999	9999
4	8	2020-06-01	2020-06-02	0	14	40	2	54.236	2	1			2	162	111	42.2954	2	1	9999	2	2	2	1	2	2	2	2	2	2	2	2	2	2	2	2	2	2	2	2								2	2	2
4	16	2020-06-09	2020-06-11	16.2924	18	60	1	70.566		1			2	175	126	41.1429	2	1	2	2	2	2	1	1	2	2	2	2	2	2	2	2	2	2	2	2	2	2	2								2	2	1
4	5	2020-06-12	2020-06-19	0	9	39	1	80.576		1			2	186	113	32.6627	2	2	2	2	1	2	2	2	2	2	2	2	2	2	2	2	2	2	2	2	2	2	2								2	2	2
4	13	2020-06-11	2020-06-24	3.5	114	58	1	56.916		2	1		2	160	90	35.1562	2	2	2	9999	1	2	1	1	2	2	2	2	2	2	2	2	2	1	1	2	2	2	2								2	2	1
4	60	2020-07-17	2020-07-28	51.6319	91	55	1	70.566		1			1	175	93.3	30.4653	2	1	9999	2	2	2	1	1	2	2	2	2	2	2	2	2	2	2	2	2	2	2	2								2	2	2
4	4	2020-06-04	2020-06-08		9	41	1	66.016		1			2	170	60	20.7612	2	9999	9999	2	1	9999	1	2	2	2	2	2	2	2	2	2	2	2	2	2	2	2	2								2	2	2
4	18	2020-07-04	2020-07-09	13.5924	23	69	1	66.016		1			2	170	72.2	24.9827	2	1	2	2	2	2	1	1	1	1	2	2	2	2	2	2	2	2	2	2	2	2	2	2018-08-27	45	0	4				1	2	1
4	8	2020-06-04	2020-06-07	4.5	17	54	2	52.416	2	1			2	160	150	58.5938	2	9999	9999	2	1	2	1	1	2	2	2	2	1	2	2	2	2	2	2	2	2	2	2								2	2	1
4	14	2020-06-19	2020-06-22	0	17	63	2	52.416	2	1			2	160	115	44.9219	2	2	2	2	1	2	1	1	2	2	2	2	1	2	2	2	2	2	2	2	2	2	2								9999	9999	9999
4	4	2020-08-30	2020-09-05	0	14	46	1	64.196		1			2	168	82	29.0533	9999	9999	9999	2	1	2	1	1	2	2	2	2	2	2	2	2	2	2	2	2	2	2	2								2	2	1
4	3	2020-07-08	2020-08-04	0	51	60	1	56.916		1			1	160	80	31.25	2	1	9999	2	2	2	1	1	2	2	2	2	2	2	2	1	2	2	2	2	2	2	2								2	2	2
4	9	2020-08-23	2020-08-30	0	15	48	2	59.696	2	2	1	7	2	168	80	28.3447	2	1	2	2	2	2	2	1	2	2	2	2	1	2	2	2	2	2	2	2	2	2	2								2	2	2
4	5	2020-06-02	2020-06-06	0	8	31	1	56.916		1			2	160	80	31.25	2	9999	9999	2	1	2	2	2	2	2	2	2	1	2	2	2	2	2	2	2	2	2	2								2	2	2
4	21	2020-06-17	2020-06-23	8.5	38	40	2	64.246	2	2		2	2	173	105	35.083	2	1	2	2	2	2	2	2	2	2	2	2	1	2	2	2	2	2	2	2	2	2	2								9999	9999	9999
4	11	2020-07-30	2020-08-05	0	35	34	2	50.596	2	2	1	7	1	158	88	35.2508	2	1	9999	2	2	2	2	2	2	2	2	2	1	2	2	2	2	2	2	2	2	2	2								2	2	2
4	19	2020-09-08	2020-09-09	0	19	73	1	61.466		1			2	165	80	29.3848	9999	9999	9999	9999	1	2	1	1	1	2	2	2	2	2	2	2	2	2	1	2	2	1	2	2019-11-19	65	0	2		20		2	2	1
4	7	2020-08-26	2020-08-30	0	12	58	1	56.916		1			2	160	80	31.25	2	1	2	2	2	2	2	1	2	2	2	2	2	2	2	2	2	2	2	2	2	2	2								2	1	2
4	4	2020-09-09	2020-09-09	0	14	63	1	64.196		1			2	168	70	24.8016	9999	9999	9999	2	1	2	1	1	2	2	2	2	2	1	2	2	2	1	2	2	2	1	2	2019-06-19	55	0	4				2	2	1
4	112	2020-06-22	2020-06-24	12.5	59	63	2	52.416	2	1			2	160	101	39.4531	2	9999	9999	2	1	2	1	2	2	2	2	2	2	2	2	2	2	2	2	2	2	2	2								2	2	2
4	6	2020-08-05	2020-08-06	0	11	55	1	64.196		1			1	168	114	40.3912	2	1	9999	2	2	2	2	1	2	2	2	2	2	2	2	2	2	2	2	2	2	2	2								2	2	2
4	6	2020-06-20	2020-06-23	0	89	75	2	52.416	2	1			2	160	150	58.5938	2	2	2	2	1	2	1	1	2	2	2	2	2	2	2	2	2	2	2	2	2	2	2								2	2	2
4	8	2020-08-29	2020-08-28	0	9	67	1	61.466		1			2	165	75	27.5482	2	1	2	2	2	2	1	2	2	2	2	2	2	2	2	2	2	2	2	2	2	2	2								2	2	2
4	14	2020-09-13	2020-09-14	0	18	68	2	50.596	2	1			2	158	102	40.8588	2	9999	9999	2	1	1	1	1	2	2	2	2	2	2	2	2	2	2	2	2	2	2	2								2	2	2
4	20	2020-06-17	2020-06-25	0	35	49	1	56.916		1			2	160	80	31.25	2	2	2	2	1	2	1	1	2	2	2	2	2	2	2	2	2	1	1	2	2	2	2								2	2	1
4	7	2020-08-10	2020-08-30	0	9	59	1	58.736		1			2	162	100	38.1039	2	1	2	2	2	2	1	1	2	2	2	2	2	2	2	2	2	2	2	2	2	2	2								9999	9999	9999
4	9	2020-08-21	2020-08-28	0	11	68	2	54.236	2	1			2	162	90	34.2936	2	1	2	2	2	2	2	1	2	2	2	2	2	2	2	2	2	2	2	2	2	2	2								2	2	2
4	11	2020-08-24	2020-08-25	0	14	76	1	47.816		1			2	150	60	26.6667	2	1	2	2	2	2	1	2	2	2	2	2	2	2	2	2	2	2	2	2	2	2	2								2	2	2
4	10	2020-06-10	2020-06-23	0	20	49	1	56.916		1			2	160	90	35.1562	9999	9999	9999	9999	1	2	1	1	2	2	2	2	2	2	2	2	2	2	2	2	2	2	2								9999	9999	9999
4	7	2020-06-23	2020-06-30	0	17	56	2	43.316	2	1			2	150	60	26.6667	2	2	2	2	1	2	2	2	2	2	2	2	2	2	2	2	2	2	2	2	2	2	2								2	2	2
4	8	2020-05-28	2020-06-07	5.5	34	53	2	59.696	2	1			2	168	91	32.2421	2	9999	9999	2	1	2	2	1	2	2	2	2	2	2	2	2	2	2	2	2	2	2	2								2	1	2
4	8	2020-05-27	2020-06-07	0	13	54	1	56.916		1			2	160	75	29.2969	2	9999	9999	2	1	2	1	1	1	2	2	2	2	2	2	2	2	2	2	2	2	2	2	2019-09-30	50	0	4				2	1	1
4	14	2020-06-10	2020-06-07	4.5	29	56	1	56.916		1			2	160	90	35.1562	2	9999	9999	2	1	2	2	2	2	2	2	2	2	2	2	2	2	2	2	2	2	2	2								2	2	2
4	15	2020-06-08	2020-06-08	3.5	18	59	1	66.016		1			2	170	100	34.6021	2	9999	9999	2	1	1	1	1	2	2	2	2	2	2	2	2	2	2	2	2	2	2	2								1	2	1
4	2	2020-06-05	2020-06-09	0	9	61	1	56.916		1			2	160	90	35.1562	2	9999	9999	2	1	2	1	1	2	2	2	2	2	2	2	1	2	2	2	2	2	2	1								2	2	1
4	41	2020-06-29	2020-07-01	75.309	135	16	1	56.916		1			1	160	77.5	30.2734	2	2	2	1	2	2	2	2	2	2	2	2	2	2	2	2	2	2	2	2	2	2	2								2	2	2
4	35	2020-06-03	2020-06-09	22.5	83	78	1	57.826		1			2	161	80	30.863	2	1	2	2	2	2	1	1	2	2	2	2	1	2	2	2	2	2	2	2	2	2	2								2	1	1
4	41	2020-06-20	2020-07-21	40.1847	61	82	2	47.866	2	1			1	155	59	24.5578	2	1	2	2	2	2	1	1	2	2	2	2	2	2	2	2	2	2	2	2	2	2	2								2	1	1
4	13	2020-06-09	2020-06-10	8.17708	17	46	2	49.686	2	1			2	157	101	40.9753	2	9999	9999	2	1	2	2	1	2	2	2	2	1	2	2	2	2	2	2	2	2	2	2								1	2	2
4	11	2020-07-03	2020-07-03	0	50	69	1	64.196		1			1	168	78	27.6361	2	1	9999	2	2	2	2	1	1	1	2	2	2	2	2	2	2	2	2	2	2	2	2	2019-01-21	45	0					1	2	1
4	50	2020-06-18	2020-06-23	40.375	71	56	1	61.466		1			2	165	75	27.5482	2	2	2	2	1	2	1	2	2	2	2	2	2	2	2	2	2	2	2	2	2	2	2								2	2	2
4	29	2020-06-05	2020-06-10	3.54167	51	56	1	66.016		1			2	170	80	27.6817	2	9999	9999	2	1	1	1	1	2	2	2	2	2	2	2	2	2	2	2	2	2	2	2								1	2	2
4	2	2020-08-24	2020-08-24	0	41	48	2	52.416	2	1			2	160	100	39.0625	2	2	2	1	2	2	1	1	1	1	2	2	2	2	2	2	2	2	2	2	2	2	1	2020-08-13	37	0	4				2	1	1
4	1	2020-08-04	2020-08-25	0	42	73	1	56.916		1			2	160	80	31.25	2	2	2	2	1	2	1	1	1	2	1	2	1	2	2	2	2	2	2	2	2	2	2								9999	9999	9999
4	54	2020-06-10	2020-06-10	34.9375	64	58	1	56.916		1			2	160	80	31.25	2	9999	9999	2	1	1	1	2	2	2	2	2	2	2	2	2	2	2	2	2	2	2	2								2	2	2
4	13	2020-07-03	2020-07-06	9.375	30	64	2	52.416	2	1			1	160	80	31.25	2	1	9999	2	2	2	1	1	2	2	2	2	1	2	2	2	2	2	2	2	2	2	2								2	1	1
4	5	2020-09-07	2020-09-16	0	14	76	1	60.556		1			2	164	75	27.8852	9999	9999	2	2	1	2	1	1	2	2	2	2	1	2	2	2	2	2	2	2	2	2	2								2	2	2
4	1	2020-08-14	2020-08-23	0	25	80	2	47.866	2	1			2	155	95	39.5421	2	2	2	2	1	2	1	1	1	1	2	1	1	2	2	1	2	2	2	2	2	2	1	2020-08-19	50	0	4				2	2	1
4	42	2020-06-22	2020-07-03	40.2917	72	60	2	34.216	2	1			2	140	60	30.6122	2	2	2	1	2	2	2	1	2	2	2	2	2	2	2	2	2	2	1	2	2	1	2								2	2	2
4	10	2020-06-20	2020-07-04	0	19	75	1	61.466		1			1	165	70	25.7117	2	1	9999	2	2	2	2	2	2	2	2	2	2	2	2	2	2	2	2	2	2	2	2								2	2	2
4	26	2020-08-22	2020-08-22	16.3806	54	61	2	52.416	2	1			2	160	100	39.0625	2	2	2	1	2	2	1	1	1	1	2	2	2	2	2	2	2	1	2	2	2	2	1	2020-08-17	55	0	4				2	1	1
4	13	2020-09-17	2020-09-14	7.75	20	51	2	52.416	2	1			2	160	65	25.3906	2	2	2	1	2	2	2	2	2	2	2	2	2	2	2	2	2	2	2	2	2	2	2								2	2	2
4	2	2020-06-11	2020-06-11	0	9	51	2	56.966	2	1			2	165	80	29.3848	2	1	9999	2	2	2	1	1	2	2	2	2	2	2	2	2	2	2	2	2	2	2	2								1	2	2
4	5	2020-06-21	2020-07-04	0	15	63	1	61.466		1			2	165	60	22.0386	2	1	9999	2	2	2	1	1	2	2	2	2	2	2	2	2	2	2	2	2	2	2	2								2	1	2
4	12	2020-06-21	2020-06-24	6.58333	20	39	2	52.416	2	2	1		2	160	80	31.25	2	2	2	2	1	2	1	1	2	2	2	2	2	2	2	2	2	2	2	2	2	2	2								1	2	2
4	9	2020-06-05	2020-06-11	2.95833	17	52	1	66.016		1			2	170	80	27.6817	2	1	2	2	2	1	2	1	2	2	2	2	2	2	2	2	2	2	2	2	2	2	2								2	1	1
4	4	2020-09-18	2020-09-19	0	10	48	1	66.016		1			2	170	80	27.6817	2	2	2	2	1	2	2	1	2	2	2	2	2	2	2	2	2	2	2	2	2	2	2	2015-01-06	55	0	2		30		2	2	1
4	15	2020-06-26	2020-07-05	3.62361	28	66	1	75.116		1			2	180	85	26.2346	9999	1	9999	2	2	2	1	1	1	1	2	2	2	2	2	2	2	2	2	2	2	2	2		30						1	2	1
4	8	2020-06-05	2020-06-11	0	20	42	2	47.866	2	1			2	155	110	45.7856	2	9999	9999	2	1	2	2	2	2	2	2	2	1	2	2	2	2	2	2	2	2	2	2								2	2	2
4	14	2020-06-24	2020-06-28	4.5	74	65	1	52.366		1			2	155	65	27.0552	2	2	2	2	1	2	2	2	2	2	2	2	2	2	2	2	2	2	2	2	2	1	1								2	2	2
4	2	2020-09-12	2020-09-21	0	5	74	1	56.916		1			2	160	75	29.2969	9999	9999	9999	9999	1	9999	2	2	2	2	2	2	2	2	2	2	2	2	2	2	2	2	2								2	2	2
4	18	2020-08-18	2020-08-22	9.60556	26	38	2	52.416	1	1			2	160	89	34.7656	2	2	2	2	1	2	2	2	2	2	2	2	2	2	2	2	2	2	2	2	2	2	2								2	2	2
4	4	2020-07-23	2020-09-22	0	15	56	1	56.916		1			2	160	60	23.4375	2	2	2	2	1	2	1	2	1	2	2	2	2	2	2	2	2	2	2	2	2	2	1								2	2	1
4	8	2020-06-25	2020-07-05	0	35	71	2	56.966	2	1			2	165	80	29.3848	2	2	2	2	1	2	1	1	2	2	2	2	1	2	2	2	2	2	2	2	2	2	2								2	2	2
4	17	2020-07-05	2020-07-06	15.7569	39	40	1	79.666		1			2	185	100	29.2184	2	1	2	2	2	2	1	2	2	2	2	2	1	2	2	2	2	2	2	2	2	2	2								2	2	2
4	8	2020-09-24	2020-09-25	0	25	89	2	56.966	2	1			2	165	90	33.0579	2	2	2	2	1	2	1	1	2	2	2	1	2	2	2	2	2	2	2	2	2	2	2		55	0					2	1	1
4	39	2020-06-06	2020-06-11	0	16	60	2	66.066	2	1			2	175	83	27.102	2	9999	9999	2	1	2	1	2	2	2	2	2	2	2	2	2	2	2	2	2	2	2	2								2	2	1
4	6	2020-08-19	2020-08-20	0	11	74	2	52.416	2	1			2	160	110	42.9688	2	2	2	2	1	2	1	1	2	2	2	2	2	2	2	1	2	2	2	2	2	2	2								2	1	1
4	25	2020-07-22	2020-07-30	24.8139	26	64	2	43.316	2	1			1	150	75	33.3333	2	1	9999	2	2	2	1	2	2	2	2	2	1	2	2	2	2	2	2	2	2	2	2								2	2	2
4	43	2020-06-16	2020-06-24	14.4583	95	35	1	75.116		2	1	9	1	180	160	70.3125	2	2	2	2	1	2	1	2	2	2	2	2	2	2	2	2	2	2	2	2	2	2	2								2	2	2
4	12	2020-09-23	2020-09-28	0	13	39	1	56.916		2	1	7	2	160	75	29.2969	2	1	2	2	2	2	2	2	2	2	2	2	2	2	2	2	2	2	2	2	2	2	2								2	2	2
4	16	2020-08-19	2020-08-20	0	18	73	2	61.516	2	1			2	170	90	31.1419	2	2	2	2	1	2	1	1	2	2	2	2	2	2	2	2	2	2	2	2	2	2	2								1	2	1
4	40	2020-06-10	2020-06-11	0	18	75	1	56.916		1			2	160	70	27.3438	2	9999	9999	2	1	2	1	1	2	2	2	2	2	2	2	2	2	2	2	2	2	2	2								2	2	1
4	8	2020-06-11	2020-06-13	0	11	50	1	73.296		1			2	178	78	24.6181	2	9999	9999	2	1	2	2	2	2	2	2	2	2	2	2	2	2	2	1	2	2	2	2								2	2	2
4	7	2020-08-17	2020-08-19	0	9	63	2	52.416	2	1			2	160	100	39.0625	2	2	2	2	1	2	1	1	2	1	2	2	1	2	2	2	2	2	2	2	2	2	2	2019-11-07	55	0	4				2	1	1
4	9	2020-07-04	2020-07-07	2.04167	23	55	1	61.466		1			2	165	74	27.1809	2	1	9999	2	2	2	1	1	2	2	2	2	1	2	2	2	2	2	2	2	2	2	2								2	1	1
4	13	2020-06-09	2020-06-12	0	21	67	1	61.466		1			2	165	80	29.3848	2	9999	9999	2	1	2	2	2	2	2	2	2	2	2	2	2	2	2	2	2	2	2	2								2	2	2
4	12	2020-06-18	2020-06-27	0	19	39	1	61.466		1			2	165	70	25.7117	2	2	2	2	1	2	1	1	2	2	2	2	1	2	2	2	2	2	2	2	2	2	2								1	2	2
4	50	2020-08-14	2020-08-17	30.5083	53	63	2	47.866	2	1			2	155	90	37.461	2	2	2	2	1	2	1	1	2	2	2	2	2	2	2	2	2	2	2	2	2	2	2								2	2	1
4	10	2020-06-15	2020-06-12	4.5	14	47	2	56.966	2	2	1	7	1	165	70	25.7117	2	1	2	2	2	2	2	2	2	2	2	2	2	2	2	2	2	2	2	2	2	2	2								2	2	2
4	37	2020-07-03	2020-07-06	0	60	61	2	52.416	2	1			1	160	90	35.1562	2	1	9999	2	2	2	1	2	2	2	2	2	1	2	2	2	2	2	2	2	2	2	2								2	2	2
4	3	2020-06-13	2020-06-28	0	39	77	2	43.316	2	1			2	150	70	31.1111	2	2	2	2	1	2	1	1	2	2	1	2	1	2	2	2	2	2	2	2	2	2	2								1	2	1
4	8	2020-09-26	2020-09-29	4.5	17	82	1	66.016		1			2	170	80	27.6817	2	2	2	2	1	2	1	1	2	2	2	2	2	2	2	2	2	2	2	2	2	2	2								1	2	2
4	13	2020-06-23	2020-06-30	0	18	54	2	52.416	2	1			2	160	80	31.25	2	2	2	2	1	2	2	2	2	2	2	2	1	2	2	2	2	2	2	2	2	2	2								2	2	2
4	4		2020-08-08	0	14	37	1	64.196		1			2	168	100	35.4308	2	1	2	2	2	2	2	2	2	2	2	2	2	2	2	2	2	2	2	2	2	2	2								2	2	2
4	10	2020-06-05	2020-06-12	0	15	46	1	66.016		1			2	170	90	31.1419	2	9999	9999	2	1	1	1	1	2	2	2	2	2	2	2	2	2	2	2	2	2	2	2								2	2	2
4	5	2020-06-13	2020-06-13	2.36528	11	52	1	75.116		1			2	180	98	30.2469	2	9999	9999	9999	1	1	1	1	2	2	2	2	2	2	2	2	2	2	2	2	2	2	2								1	2	1
4	32	2020-06-23	2020-06-29	17.7743	38	54	1	66.016		1			2	170	100	34.6021	2	2	2	2	1	2	1	1	2	2	2	2	2	2	2	2	2	2	2	2	2	2	2								1	2	2
4	1		2020-08-11	0	2	63	2	52.416	2	1			2	160	70	27.3438	2	9999	9999	9999	1	2	1	2	2	2	2	2	2	2	2	2	2	2	2	2	2	2	2								2	2	2
4	7	2020-07-05	2020-07-09	0	9	53	1	73.296		1			2	178	100	31.5617	2	1	9999	2	2	2	1	2	2	2	2	2	2	2	2	2	2	2	2	2	2	2	2								2	2	2
4	15	2020-08-16	2020-08-16	0	19	62	2	56.966	2	1			2	165	99	36.3636	2	2	2	2	1	2	1	1	2	2	2	2	2	2	2	2	2	2	2	2	2	2	2								1	2	2
4	3	2020-05-13	2020-05-16	2.5	6		2	59.696	2	2	1		2	168	89	31.5334	2	2	2	2	1	2	2	2	2	2	2	2	1	2	2	2	2	2	2	2	2	2	2								2	2	2
4	9	2020-08-10	2020-08-16	0	24	65	1	64.196		1			2	168	70.8	25.085	2	2	2	2	2	2	1	1	1	1	2	2	2	2	2	2	2	1	1	2	2	2	2	2013-05-01	35	0	4				2	2	1
4	13	2020-07-02	2020-07-09	11.7701	18	59	1	59.646		1			2	163	72	27.0993	2	1	2	2	2	1	1	1	2	2	2	2	1	2	2	2	2	2	2	2	2	2	2								2	1	1
4	75	2020-05-26	2020-06-24	67.5833	122	55	2	61.516	2	1			2	170	85	29.4118	2	2	2	2	2	2	1	2	2	2	2	2	2	2	2	2	2	2	2	1	2	2	2								2	2	2
4	7	2020-07-19	2020-07-29	0	14	32	1	58.736		2	1	7	2	162	83	31.6263	2	1	9999	2	2	2	2	2	2	2	2	2	2	2	2	2	2	2	2	2	2	2	2								2	2	2
4	4	2020-06-11	2020-06-13	0	10	62	2	47.866	2	1			2	155	70	29.1363	2	9999	9999	2	1	2	1	2	2	2	2	2	2	2	2	2	2	2	2	2	2	2	2								2	2	2
4	9	2020-08-10	2020-08-14	0	14	66	1	56.916		1			2	160	80	31.25	2	2	2	2	1	2	1	1	2	2	2	2	2	2	2	2	2	2	2	2	2	2	2								2	2	1
4	7	2020-06-12	2020-06-14	0	15	54	2	52.416	2	1			2	160	95	37.1094	2	1	2	2	2	2	2	1	2	2	2	2	1	2	2	2	2	2	2	2	2	2	2								2	2	2
4	5	2020-07-02	2020-07-10	0	17	52	2	44.226	2	1			2	151	84	36.8405	2	1	2	2	2	2	1	1	2	2	2	2	2	2	2	2	2	2	2	2	2	2	2								2	1	1
4	29	2020-08-03	2020-08-24	34.5	44	70	1	56.916		1			2	160	70	27.3438	2	2	2	2	1	2	1	1	1	2	2	2	2	2	2	2	2	2	2	2	2	2	2								2	2	2
4	30	2020-08-06	2020-08-20	29.5382	36	67	2	54.236	2	1			2	162	100	38.1039	2	1	2	2	2	2	1	1	1	1	2	2	1	2	2	2	2	2	2	2	2	2	2	2019-08-08	50	0	4				2	2	1
4	8	2020-06-01	2020-06-02	8.5	10	63	2	61.516	2	1			2	170	90	31.1419	2	2	2	2	1	2	1	1	2	2	2	2	2	2	2	1	2	2	2	2	2	2	2								2	2	2
4	8	2020-06-11	2020-06-13	0	12	50	1	73.296		1			2	178	78	24.6181	2	1	2	2	2	2	2	2	2	2	2	2	2	2	2	2	2	2	2	2	2	2	2								2	2	2
4	25	2020-07-06	2020-07-12	17.5319	76	67	2	56.966	2	1			2	165	130	47.7502	2	1	2	2	2	2	1	1	1	1	2	2	1	2	2	2	2	2	2	2	2	2	2		55	1	5				2	1	1
4	58	2020-07-22	2020-07-28	-14.4938	85	55	2	47.866	2	2	1	7	1	155	77	32.0499	9999	9999	9999	2	1	1	1	1	2	2	1	2	1	2	2	1	1	2	2	2	2	2	2								2	2	1
4	63	2020-06-21	2020-06-28	0	31	77	2	43.316	2	1			2	150	70	31.1111	2	9999	9999	2	1	2	1	1	2	2	2	2	2	2	2	2	2	2	2	2	2	2	2								1	2	1
4	6	2020-05-30	2020-05-31	0	11	42	1	64.196		2	1		2	168	70	24.8016	2	1	2	2	2	2	2	2	2	2	2	2	2	2	2	2	2	2	2	2	2	2	2								2	2	2
4	25	2020-07-06	2020-07-12	7.63472	41	42	2	43.316	1	1			2	150	100	44.4444	2	1	2	2	2	2	2	2	2	2	2	2	1	2	2	2	2	2	2	2	2	2	2								2	2	2
4	4	2020-08-12	2020-08-13	0	8	60	1	56.916		1			2	160	70	27.3438	2	2	2	2	1	2	1	1	2	2	2	2	2	2	2	2	2	2	2	2	2	2	2								2	1	2
4	13	2020-09-02	2020-09-09	12.5	13	23	1	71.476		1			2	176	70	22.5981	2	2	2	1	2	2	2	2	2	2	2	2	2	2	2	2	2	2	2	2	2	2	2								2	2	2
4	9	2020-05-30	2020-05-29	4.5	14	58	1	66.016		2	1		2	170	75	25.9516	2	2	2	2	1	2	2	2	1	2	2	2	2	2	2	2	2	2	2	2	2	2	2								9999	9999	9999
4	4	2020-06-11	2020-06-18	0	17	36	1	56.916		1			2	160	120	46.875	2	9999	9999	2	1	1	2	2	2	2	2	2	2	2	2	2	2	2	2	2	2	2	2								2	2	2
4	8	2020-08-24	2020-08-31	3.35972	15	50	2	61.516	2	1			2	170	60	20.7612	2	2	2	2	1	2	1	1	2	2	2	2	2	2	2	2	2	2	2	2	2	1	2								2	2	1
4	6	2020-06-10	2020-06-15	0	40	48	2	52.416	2	1			2	160	83	32.4219	2	9999	9999	2	1	2	2	2	2	2	2	2	2	2	2	2	2	2	2	2	2	2	2	2020-11-01	65	0					2	2	1
4	8	2020-05-26	2020-05-31	5.5	23	50	1	56.916		2	1		2	160	95	37.1094	2	2	2	2	1	2	1	1	2	2	2	2	2	2	2	2	2	2	2	2	2	2	2								9999	9999	9999
4	6	2020-06-05	2020-06-15		16	61	2	52.416	2	1			2	160	90	35.1562	2	9999	9999	2	1	2	1	1	1	2	2	2	1	2	2	2	2	2	2	2	2	2	2								2	2	1
4	6	2020-07-10	2020-07-12	0	12	35	1	55.096		1			2	158	79	31.6456	2	1	2	2	2	1	2	2	2	2	2	1	1	2	2	2	2	2	2	2	2	2	2								2	2	2
4	10	2020-09-21	2020-09-25	0	12	67	1	64.196		1			2	168	70	24.8016	2	1	2	2	2	2	1	1	2	2	2	2	2	2	2	2	2	2	2	2	2	2	2								2	1	1
4	7	2020-05-25	2020-05-26	2.5	9	68	1	61.466		2	1	2	2	165	113	41.506	2	1	2	2	2	2	2	2	2	2	2	2	2	2	2	2	2	2	2	2	2	2	2								2	2	2
4	4	2020-06-17	2020-06-17		11	32	1	65.106		1			2	169	60	21.0077	2	1	2	2	2	2	2	2	2	2	2	2	2	2	2	2	2	2	2	2	2	2	2								2	2	2
4	6	2020-08-17	2020-08-28	0	7	43	1	66.016		1			2	170	100	34.6021	2	2	2	2	1	2	2	2	2	2	2	2	2	2	2	2	2	2	2	2	2	2	2								2	2	2
4	109	2020-07-08	2020-07-13	101.333	113	90	1	61.466		1			2	165	70	25.7117	2	1	2	2	2	2	1	1	1	1	2	2	2	2	2	2	2	2	2	2	2	2	2	2020-10-06	55		2		50		1	2	1
4	36	2020-07-16	2020-07-27	77.1243	59	45	2	45.136	2	1			2	152	64	27.7008	2	9999	9999	9999	1	2	2	2	2	2	2	2	2	2	2	2	2	2	2	2	2	2	2								2	2	2
4	11	2020-08-09	2020-08-12	0	13	77	1	56.916		1			2	160	75	29.2969	2	2	2	2	1	2	1	1	2	2	2	2	2	2	2	2	2	2	2	2	2	2	2								9999	9999	9999
4	15	2020-08-30	2020-09-12	13.3861	25	63	2	56.966	2	1			2	165	80	29.3848	2	9999	9999	9999	1	2	2	2	2	2	2	2	1	2	2	2	2	2	2	2	2	2	2								9999	9999	9999
4	19	2020-06-15	2020-06-21	0	39	67	1	63.286		1			2	167	82	29.4023	2	9999	9999	2	1	2	1	1	2	2	2	2	2	2	2	2	2	2	2	2	2	2	2								2	2	2
4	3	2020-10-11	2020-10-15	0	8	65	2	52.416	2	1			2	160	70	27.3438	2	1	2	2	2	2	1	1	1	2	2	2	2	2	2	2	2	2	2	2	2	2	2								9999	9999	9999
4	4	2020-10-10	2020-10-11	0	11	74	1	64.196		1			2	168	70	24.8016	2	2	2	1	2	2	1	1	2	2	2	2	2	2	2	1	2	2	2	2	2	2	2								2	2	1
4	9	2020-06-16	2020-06-18	0	43	49	1	61.466		1			2	165	80	29.3848	2	9999	9999	2	1	2	2	2	2	2	2	2	2	2	2	2	2	2	2	2	2	2	2								2	2	2
4	7	2020-06-15	2020-06-21	0	22	67	1	63.286		1			2	167	82	29.4023	2	9999	9999	2	1	2	1	1	2	2	2	2	2	2	2	2	2	2	2	2	2	2	2								1	2	2
4	9	2020-07-15	2020-07-13	5.40208	13	57	2	56.966	2	1			2	165	80	29.3848	2	1	2	2	2	2	1	1	2	2	2	2	2	2	2	2	2	2	2	2	2	2	2								2	1	2
4	15	2020-09-15	2020-09-26	1.5	15	61	2	52.416	2	1			2	160	75	29.2969	2	2	2	2	1	2	2	2	2	2	2	2	2	2	2	2	2	2	2	2	2	2	2								2	2	2
4	12	2020-05-30	2020-05-31	12.75	13	53	1	66.016		2	1	7	2	170	75	25.9516	2	2	2	2	2	2	1	1	2	2	2	2	2	2	2	2	2	2	2	2	2	2	2								2	2	2
4	5	2020-10-02	2020-10-09	0	7	54	1	61.466		1			2	165	75	27.5482	2	1	2	2	2	2	1	1	2	2	2	2	2	2	2	1	2	2	2	2	2	2	2								2	1	1
4	7	2020-09-15	2020-10-01	0	8	43	1	75.116		1			2	180	160	49.3827	2	2	2	2	1	2	1	2	2	2	2	2	2	2	2	2	2	2	2	2	2	2	2								2	2	2
4	20	2020-09-26	2020-09-26	17.8542	92	55	1	56.916		1			2	160	90	35.1562	9999	9999	2	1	2	2	1	1	2	2	2	2	2	2	2	2	2	2	1	2	2	1	2	2020-02-24	55	0	5				2	2	1
4	2	2020-05-22	2020-07-13	0	12	28	2	53.326	1	1			2	161	55	21.2183	2	1	2	2	2	2	2	2	2	2	2	2	2	2	1	2	2	2	2	2	2	2	1								2	2	2
4	52	2020-08-08	2020-08-10	45.5	81	70	2	47.866	2	1			2	155	120	49.948	2	2	2	2	1	2	1	1	2	2	2	2	2	2	2	2	2	2	1	2	2	2	2								1	2	2
4	9	2020-05-25	2020-05-31	0	38	55	1	56.916		1			2	160	55	21.4844	2	2	2	2	1	2	2	2	2	2	2	2	1	2	2	1	1	1	1	2	2	2	2								2	2	1
4	5	2020-06-26	2020-07-14	0	23	70	1	61.466		1			2	165	90	33.0579	2	1	2	2	2	2	1	1	1	2	2	2	2	2	2	2	2	2	2	2	2	2	2	2019-11-27	55	1	5				2	1	1
4	4	2020-06-12	2020-06-19	0	8	39	1	80.576		1			2	186	113	32.6627	2	9999	9999	2	1	1	2	2	2	2	2	2	2	2	2	2	2	2	2	2	2	2	2								2	2	2
4	7	2020-09-30	2020-10-07	0	9	43	1	56.916		2	1	7	2	160	71	27.7344	2	2	2	2	1	2	2	2	2	2	2	2	2	2	2	2	2	2	2	2	2	2	2								2	2	2
4	7	2020-07-26	2020-07-31	0	48	54	2	52.416	2	1			2	160	80	31.25	2	9999	9999	2	1	2	2	1	2	2	2	2	1	2	2	2	2	2	2	2	2	2	2								2	2	2
4	14	2020-05-20	2020-05-27	10.5	42	62	2	47.866	2	1			2	155	100	41.6233	2	2	2	2	1	2	1	1	2	2	2	2	2	2	2	2	2	2	2	2	2	2	2								2	2	1
4	10	2020-07-28	2020-07-31	0	20	49	1	53.276		1			2	156	84	34.5168	2	9999	9999	2	1	2	1	1	2	2	2	2	1	2	2	2	2	2	2	2	2	2	2								2	1	2
4	14	2020-07-22	2020-07-22	2.70833	17	31	2	47.866	2	1			2	155	55	22.8928	2	2	9999	2	2	2	1	2	2	2	2	2	2	2	2	2	2	2	2	2	2	2	2								2	2	2
4	15	2020-05-20	2020-05-27	9.5	36	52	1	66.016		1			2	170	69	23.8754	2	2	2	2	1	2	2	1	2	2	2	2	2	2	2	1	2	1	1	2	2	2	2								2	2	2
4	48	2020-07-10	2020-07-20	38.2069	112	83	2	43.316	2	1			2	150	90	40	2	1	2	2	2	2	1	1	2	2	2	2	2	2	2	2	2	2	2	2	2	2	2	2020-07-16	55	0	4				1	2	1
4	19	2020-09-08	2020-09-09	0	20	73	1	61.466		1			2	165	80	29.3848	2	2	2	1	2	2	1	1	1	2	2	2	2	2	2	2	2	2	1	2	2	1	1								2	2	1
4	30	2020-07-08	2020-07-22	30.5451	30	38	1	70.566		2	1	3	2	175	122	39.8367	9999	1	9999	2	2	2	2	2	2	2	2	2	2	2	2	2	2	2	2	2	2	2	2								2	2	2
4	1	2020-05-22	2020-05-27	0	7	75	1	56.916		1			2	160	70	27.3438	2	2	2	2	1	2	1	1	1	2	2	2	2	2	2	2	2	2	2	2	2	2	2								2	1	1
4	15	2020-07-09	2020-07-21	0	30	72	1	52.366		1			2	155	90	37.461	2	2	2	2	1	2	1	1	2	2	2	2	2	2	2	1	1	1	2	2	2	2	2	2020-01-01	55	0	4				2	2	1
4	10	2020-05-28	2020-06-07	8.5	116	53	1	64.196		1			2	168	91	32.2421	2	2	2	2	1	2	2	1	2	2	2	2	2	2	2	2	2	2	2	2	2	2	2								2	1	2
4	4	2020-07-05	2020-07-16	0	18	63	2	43.316	2	1			2	150	55	24.4444	2	1	2	2	2	2	1	2	2	2	2	2	1	2	2	2	2	2	2	2	2	2	2								2	2	2
4	17	2020-06-02	2020-05-31	16.5	18	66	2	61.516	2	2	1		2	170	90	31.1419	2	2	2	2	1	2	1	1	2	2	2	2	2	2	2	2	2	2	2	2	2	2	2								9999	9999	9999
4	50	2020-08-06	2020-08-08	0	53	34	1	61.466		1			1	165	70	25.7117	2	1	2	2	2	2	1	2	2	2	2	2	1	1	2	2	2	2	2	2	2	2	2								2	2	2
4	1	2020-07-16	2020-07-21	0	19	47	1	66.016		1			2	170	100	34.6021	9999	9999	9999	2	2	2	1	2	2	2	2	2	2	2	2	2	2	2	2	2	2	2	2								2	2	2
4	54	2020-06-07	2020-06-13	37.4042	59	55	1	68.746		1			2	173	80	26.7299	2	2	2	2	1	2	1	2	2	2	2	2	1	2	2	2	2	2	2	2	2	2	2								2	2	1
4	3	2020-07-14	2020-07-17	0	9	61	2	61.516	2	1			2	170	120	41.5225	2	1	2	2	2	2	1	2	2	2	2	2	2	2	2	2	2	2	2	2	2	2	2								2	2	2
4	4	2020-07-12	2020-07-21	0	9	53	1	71.476		1			2	176	115	37.1255	9999	1	9999	2	2	2	2	2	2	2	2	2	2	2	2	2	2	2	2	2	2	2	2								2	2	2
4	18	2020-05-31	2020-05-31	14.5	27	44	2	52.416	2	2	1		2	160	60	23.4375	2	2	2	2	1	2	2	2	2	2	2	2	2	2	2	2	2	2	2	2	2	2	2								2	2	2
4	35	2020-07-16	2020-07-05	7.55903	66	28	1	74.206		1			2	179	70	21.847	2	2	2	1	2	2	2	2	2	2	2	2	2	2	2	2	2	2	2	2	2	2	2								2	2	2
4	35	2020-09-18	2020-09-22	22.5	46	67	1	64.196		1			2	168	85	30.1162	2	2	2	2	1	2	1	1	2	2	2	2	2	2	2	2	2	2	2	2	2	2	2								2	2	2
4	2	2020-07-14	2020-07-20	0	12	65	2	56.966	2	1			2	165	70	25.7117	2	1	9999	2	2	2	1	1	2	2	2	2	2	2	2	2	2	2	2	2	2	2	2
4	30	2020-05-06	2020-05-11	144.5	152	43	1	66.016		1			2	170	98	33.91	2	2	2	2	1	2	2	1	2	2	2	2	2	2	2	2	2	2	2	2	2	2	2								1	2	2
4	16	2020-06-20	2020-06-21	16.2688	17	39	1	56.916		2	1	9	2	160	120	46.875	9999	9999	9999	9999	1	2	1	2	2	2	2	2	2	2	2	2	1	2	2	2	2	2	2								2	2	2
4		2020-06-12		30.8333	36	77	1	64.196		1			2	168	65	23.03	2	1	2	1	1	2	1	1	2	2	2	2	2	2	2	2	2	2	2	2	2	2	2								2	2	2
4	46	2020-06-23	2020-06-26	12.6042	52	59	1	66.016		1			2	170	70	24.2215	2	2	2	2	1	2	1	2	2	2	2	2	2	2	2	2	2	2	2	2	2	2	2								2	2	2
4	12	2020-06-09	2020-06-14	11.6396	15	55	2	47.866	2	1			2	155	75	31.2175	2	2	2	2	1	2	2	1	2	2	2	2	2	2	2	2	2	2	2	2	2	2	2								9999	9999	9999
4	23	2020-06-12	2020-07-09	21.5396	34	77	1	58.736		1			2	162	88	33.5315	2	2	2	2	1	2	1	1	2	2	2	2	2	2	2	2	2	2	2	2	2	2	2								9999	9999	9999
4	19	2020-07-04	2020-07-07	17.4778	23	75	2	52.416	2	1			2	160	90	35.1562	2	1	2	2	2	2	1	1	1	2	2	2	2	2	2	2	2	2	2	2	2	2	2	2020-06-30	50	0	4				2	2	1
4	8	2020-07-03	2020-07-10	7.19236	13	63	2	61.516	2	1			2	170	95	32.872	9999	9999	9999	2	2	2	1	2	1	1	2	2	2	2	2	2	2	2	2	2	2	2	2								9999	9999	9999
4	18	2020-07-21	2020-07-22	17.1708	19	26	2	54.236	2	1			2	162	100	38.1039	2	1	2	2	2	2	1	2	2	2	2	2	2	2	2	2	2	2	2	2	2	2	2	2020-04-14	65	0	4				2	2	2
4	17	2020-06-09	2020-06-11	17	19	60	1	70.566		1			2	175	126	41.1429	2	2	2	2	1	2	1	1	2	2	2	2	2	2	2	2	2	2	2	2	2	2	2								2	1	2
4	16	2020-09-04	2020-08-02	13.5986	18	61	2	40.586	2	1			2	147	75	34.7078	2	1	2	2	2	2	1	1	2	2	1	1	2	2	2	2	2	2	2	2	2	2	2	2019-12-15	55	0	5				2	2	1
4	13	2020-07-24	2020-08-12	12.1687	13	52	2	52.416	2	1			2	160	62	24.2188	2	2	2	2	1	2	1	1	2	2	2	2	2	2	2	2	2	1	1	2	2	2	2								2	2	1
4	28	2020-07-22	2020-07-30	26.8132	29	64	2	43.316	2	1			2	150	75	33.3333	2	1	2	2	2	2	1	2	2	2	2	2	1	2	2	2	2	2	2	2	2	2	2								2	2	2
4	17	2020-08-10	2020-08-10	11.5	30	55	1	60.556		1			2	164	68	25.2826	2	9999	9999	1	2	2	2	2	2	2	2	2	2	2	2	1	2	2	1	2	2	1	2								2	2	2
4	20	2020-08-16	2020-08-19	6.45833	21	79	1	61.466		1			2	165	80	29.3848	2	2	2	2	1	2	1	2	2	2	2	2	1	2	2	2	2	2	2	2	2	2	2								2	2	2
4	5	2020-08-28	2020-09-10	2.5	35	92	1	52.366		1			2	155	70	29.1363	2	2	2	1	2	2	1	1	1	2	2	2	2	2	2	2	2	2	2	2	2	2	2	2019-07-27	50	0	4				1	2	1
4	12	2020-09-09	2020-09-09	11.5312	12	23	1	71.476		1			2	176	70	22.5981	2	2	2	2	1	2	2	2	2	2	2	2	2	2	2	2	2	2	2	2	2	2	1								9999	9999	9999
4	12	2020-08-30	2020-09-10	44096	23	61	2	43.316	2	1			2	150	77	34.2222	2	2	2	2	1	2	1	1	1	2	2	2	2	2	2	2	2	2	2	2	2	2	2								1	2	1
4	47	2020-10-09	2020-10-12	14.3514	49	70	1	59.646		1			2	163	80	30.1103	2	1	2	2	2	2	2	1	2	2	2	2	2	2	2	2	2	2	2	2	2	2	2
4	17	2020-08-22	2020-09-10	16.3993	23	61	2	56.966	2	1			2	165	80	29.3848	2	2	2	1	2	2	1	1	1	2	2	2	1	2	2	2	2	2	2	2	2	2	1								2	2	1
4	6	2020-10-16	2020-10-23	0	11	56	1	56.916		1			2	160	70	27.3438	2	1	2	2	2	2	1	1	2	2	2	2	2	2	2	2	2	2	2	2	2	2	2								2	1	1
4	4	2020-10-25	2020-10-25	0	10	63	1	55.096		1			2	158	80	32.0461	2	1	9999	2	1	2	1	1	2	2	2	2	2	2	2	2	2	2	2	2	2	2	2								2	2	1
4	12	2020-04-12	2020-04-12	9.25694	12	67	1	56.916		2	1		2	160	70	27.3438	2	2	2	2	1	2	2	2	2	2	2	2	2	2	2	2	2	2	2	2	2	2	2								2	2	2
4	13	2020-10-10	2020-10-14	10.5569	13	80	1	64.196		1			2	168	80	28.3447	2	2	2	2	1	2	1	1	2	2	2	2	2	2	2	1	2	2	2	2	2	2	2								1	2	1
4	13	2020-09-12	2020-10-07	16.5	13	85	1	66.016		1			2	170	70	24.2215	2	2	2	1	2	2	1	1	2	2	1	2	2	2	2	2	2	2	2	2	2	2	2								2	2	1
4	27	2020-10-18	2020-10-19	3.12153	34	61	2	47.866	2	1			2	155	90	37.461	2	1	9999	2	1	2	1	1	1	2	2	2	2	2	2	2	2	2	2	2	2	2	2
4	11	2020-10-08	2020-10-18	0	14	39	2	36.036	2	2	1	9	2	142	90	44.634	2	2	2	2	1	2	2	2	2	2	2	2	2	2	2	2	2	2	2	2	2	2	2								2	2	2
4	4	2020-10-04	2020-10-10	3.37569	10	79	1	61.466		1			2	165	80	29.3848	2	2	2	2	1	2	1	1	1	2	2	2	2	2	2	1	1	2	2	2	2	2	2								2	1	1
4	49	2020-10-07	2020-10-12	-44123.5	51	28	1	61.466		1			1	165	85	31.2213	2	1	2	2	2	2	2	2	2	2	2	2	1	2	2	2	2	2	2	2	2	2	2
4	42	2020-10-06	2020-10-21	44167	42		2	56.966	2	1			2	165	80	29.3848	2	1	2	2	2	2	2	2	2	2	2	2	2	2	2	2	2	2	1	2	2	2	2								2	2	2
4	40	2020-10-21	2020-10-20	2.41597	14	39	2	61.516	2	2	1	6	2	170	175	60.5536	9999	1	9999	2	1	2	2	2	2	2	2	2	2	2	2	2	2	2	2	2	2	2	2								2	2	2
4	5	2020-10-14	2020-10-24	0	9	78	1	64.196		1			2	168	90	31.8878	2	2	2	2	2	2	1	1	2	1	2	2	2	2	2	2	2	2	2	2	2	2	2	2019-12-22	25	0	2		60		2	1	1
4	12	2020-10-08	2020-10-13	0	13	78	1	56.916		1			2	160	69	26.9531	2	1	2	2	2	2	2	1	2	2	2	2	2	2	2	1	2	2	2	2	2	2	2								2	1	2
4	21	2020-10-05	2020-10-10	0	27	58	1	66.016		1			2	170	80	27.6817	2	2	2	2	1	2	1	1	1	2	2	2	2	2	2	2	2	2	2	2	2	2	2								1	2	1
4	14	2020-10-19	2020-10-19	8.65208	15	56	1	61.466		1			2	165	80	29.3848	2	2	2	2	1	2	1	1	2	2	2	2	1	2	2	2	2	2	2	2	2	2	2								1	1	1
4	13	2020-10-10	2020-10-14	10.3229	13	80	1	64.196		1			2	168	80	28.3447	2	1	2	2	2	2	1	1	2	2	2	2	2	2	2	1	2	2	2	2	2	2	2	2020-11-13	55	0	5				1	2	1
4	16	2020-10-05	2020-10-11	5.39236	26	46	2	50.596	2	1			2	158	70	28.0404	2	2	2	2	1	2	2	2	2	2	2	2	2	2	2	2	2	2	2	2	2	2	2								2	2	2
4	10	2020-08-18	2020-09-11	0	29	81	1	64.196		1			2	168	90	31.8878	2	1	2	2	2	2	1	1	2	2	2	2	2	2	2	2	2	2	2	2	2	2	2								1	2	1
4	2	2020-06-08	2020-06-09	0	10	57	2	52.416	2	1			2	160	90	35.1562	2	9999	9999	2	1	2	1	1	2	2	2	2	2	2	2	2	2	2	2	2	2	2	1								2	1	1
4	9	2020-06-10	2020-06-13	5.40278	25	56	2	43.316	2	1			2	150	80	35.5556	2	9999	9999	2	1	2	1	1	1	2	2	2	2	2	2	2	2	2	2	2	2	2	2								1	2	1
4	28	2020-07-08	2020-07-11	12.4542	75	60	1	56.916		1			2	160	80	31.25	2	2	2	2	1	2	1	1	2	2	2	2	2	2	2	2	1	2	2	2	2	2	2								2	2	1
4	3	2020-05-30	2020-05-29	-0.270833	3	71	1	66.016		1			2	170	90	31.1419	2	2	2	2	1	2	1	1	2	2	2	2	2	2	2	2	2	2	2	2	2	2	2								1	2	2
4	4	2020-05-26	2020-05-26	0	5	65	1	66.016		1			2	170	80	27.6817	2	2	2	2	1	2	1	1	2	2	2	2	2	2	2	2	2	1	1	2	2	2	2								9999	9999	9999
4	1	2020-05-08	2020-05-17	-0.65	1	88	1	58.736		1			2	162	69	26.2917	2	2	2	2	1	2	2	1	1	2	2	2	2	2	2	1	2	1	2	2	2	2	2	2020-02-19	55	0	4				1	2	1
4	2	2020-08-01	2020-08-01	0	14	44	1	66.016		1			2	170	130	44.9827	2	9999	9999	2	1	2	1	1	2	2	2	2	2	2	2	1	2	2	2	2	2	2	1								2	1	2
4	20	2020-06-18	2020-06-22	19.5	24	64	1	61.466		1			2	165	80	29.3848	2	2	2	2	1	2	1	1	2	2	2	2	2	2	2	2	2	2	2	2	2	2	2								1	2	2
4	50	2020-06-18	2020-06-23	35.5097	81	55	1	61.466		1			2	165	75	27.5482	2	2	2	2	1	2	1	2	2	2	2	2	2	2	2	2	2	2	2	2	2	2	2								2	2	2
4	13	2020-07-28	2020-08-20	0.590278	36	71	1	61.466		1			2	165	118	43.3425	2	2	2	2	1	1	1	1	2	2	2	2	2	2	2	2	2	2	2	2	2	2	2								2	2	1
4	1	2020-05-24	2020-05-24	-0.416667	1	63	1	61.466		1			2	165	90	33.0579	2	1	2	2	2	2	1	1	1	2	2	2	2	2	2	2	2	2	2	2	2	2	2	2017-05-12	60	0	2		25		1	2	1
4	6	2020-06-18	2020-06-17	0	6	84	2	57.876	2	1			2	166	80	29.0318	2	2	2	2	1	2	1	1	2	2	2	2	1	2	2	2	2	2	2	2	2	2	2								1	2	2
4	4	2020-06-06	2020-06-06	0	4	76	2	50.596	2	1			2	158	54	21.6311	2	9999	9999	2	1	2	1	1	1	2	2	2	2	2	2	1	2	2	2	2	2	2	2	2020-03-08	60	0					2	1	1
4	1	2020-05-25	2020-05-25	0	2	63	1	61.466		1			2	165	70	25.7117	2	1	2	2	2	2	1	2	2	2	2	2	2	2	2	2	2	2	2	2	2	2	2								2	2	2
4	2	2020-06-10	2020-06-14	0	7	86	2	45.136	2	1			2	152	54	23.3726	2	9999	9999	2	1	2	1	1	2	2	2	1	2	2	2	2	2	2	2	2	2	2	2	2020-02-18	60	0	2		40		1	2	2
4	18	2020-06-19	2020-06-20	6.50903	18	76	2	57.876	2	1			2	166	90	32.6608	2	2	2	2	1	2	1	1	2	2	2	2	2	2	2	2	2	2	2	2	2	2	2								2	2	1
4	1	2020-05-21	2020-05-25	0	6	72	1	61.466		1			2	165	70	25.7117	2	1	2	2	2	1	1	2	2	2	1	2	1	2	2	2	2	2	2	2	2	2	2	2007-10-31	55	0	4				2	2	1
4	22	2020-07-16	2020-07-21	11.3576	22	52	2	47.866	2	1			2	155	80	33.2986	2	2	2	2	1	2	1	1	2	2	2	2	2	2	2	1	2	1	2	2	2	2	2	2012-09-23	60	0	2		25		2	2	2
4	4	2020-07-09	2020-07-12	6.04097	17	80	2	52.416	2	1			2	160	70	27.3438	2	1	2	1	2	2	1	1	2	2	2	2	2	2	2	2	2	2	2	2	2	1	2	2020-04-15	60	0	2		55		2	1	2
4	3	2020-11-26	2020-05-26	0	4	65	1	66.016		1			2	170	75	25.9516	2	1	2	2	2	2	1	1	2	2	2	2	2	2	2	2	2	2	1	2	2	1	2	2009-12-08	65	0	2		30		2	1	1
4	2	2020-05-24	2020-05-23	0	2	80	1	61.466		1			2	165	69	25.3444	2	1	2	2	2	1	1	1	1	2	1	1	2	2	2	2	2	2	2	2	2	2	2	2019-10-31	55	0	2		60		2	1	1
4	12	2020-07-21	2020-07-22	11.5444	13	76	1	64.196		1			2	168	70	24.8016	2	2	2	2	1	2	1	1	2	2	2	2	2	2	2	2	2	2	2	2	2	2	2	2015-05-20	55	0	2		25		1	2	2
4	10	2020-07-10	2020-07-16	0	12	69	2	43.316	2	1			2	150	80	35.5556	2	1	2	2	2	2	1	1	2	2	2	2	2	2	2	1	2	2	2	2	2	2	2								2	1	2
4	2	2020-05-21	2020-05-24	0	11	96	1	70.566		1			2	175	100	32.6531	2	9999	9999	9999	1	2	1	1	9999	9999	9999	9999	9999	9999	9999	9999	9999	9999	9999	9999	9999	9999	9999								1	2	2
4	6	2020-05-19	2020-05-19	-0.236111	37	79	2	52.416	2	1			2	160	80	31.25	2	1	2	2	2	2	1	1	2	2	2	2	2	2	2	2	2	2	2	2	2	2	2								2	1	1
4	1	2020-07-14	2020-07-14	-0.999306	1	87	2	56.966	2	1			2	165	65	23.8751	2	1	2	2	2	2	1	1	1	2	2	2	2	2	2	2	2	2	2	2	2	2	2	2019-09-25	25	0	2		50		2	1	1
4	7	2020-05-23	2020-05-23	1.78681	7	87	2	56.966	2	1			2	165	65	23.8751		1	2	2	2	2	1	1	2	2	2	2	1	2	2	2	2	2	2	2	2	2	2	2019-03-12	60	0	2		25		1	2	1
4	10	2020-06-01	2020-05-30	9.05694	10	63	1	72.386		1			2	177	95	30.3233	2	1	2	2	2	2	1	1	1	2	2	2	2	2	2	2	2	2	2	2	2	2	2								2	1	1
4	8	2020-07-13	2020-07-12	0	20	99	1	57.826		1			2	161	75	28.9341	2	1	2	1	2	2	1	1	2	2	2	2	2	2	2	2	2	2	2	2	2	2	2								2	2	2
4	3	2020-05-30	2020-05-29	-0.272222	3	71	1	66.016		1			2	170	90	31.1419	2	2	2	2	2	2	1	1	2	2	2	2	2	2	2	2	2	2	2	2	2	2	2								2	1	1
4	5	2020-10-22	2020-10-29	0	8	40	1	61.466		1			2	165	100	36.7309	2	2	2	2	1	2	2	2	2	2	2	2	1	2	2	2	2	2	2	2	2	2	2								2	2	2
4	4	2020-10-24	2020-10-30	0	7	37	1	56.916		1			2	160	120	46.875	2	9999	9999	2	1	1	2	2	2	2	2	2	2	2	2	2	2	2	2	2	2	2	2								2	2	2
4	8	2020-06-13	2020-06-25	7.55486	20	70	2	54.236	2	1			2	162	75	28.578	2	2	2	2	1	2	1	1	2	2	2	2	2	1	2	2	2	2	2	2	2	2	2								2	1	1
4	8	2020-05-08	2020-05-08	5.04167	8	64	1	66.016		1			2	170	70	24.2215	2	2	2	2	1	2	1	1	1	2	2	2	1	2	2	2	2	2	2	2	2	2	2								1	2	1
4	7	2020-10-15	2020-10-27	0	9	60	1	66.016		1			2	170	85	29.4118	2	9999	9999	2	1	2	1	2	2	2	2	2	2	2	2	2	2	2	2	2	2	2	2								2	2	1
4	7	2020-05-25	2020-05-30	32.0042	13	77	1	51.456		1			2	154	60	25.2994	2	1	2	2	2	2	1	1	2	2	2	2	2	2	2	2	2	2	2	2	2	2	2	2019-04-19	55		2		25		1	2	1
4	8	2020-07-09	2020-07-13	8.43056	13	48	2	56.966	2	1			2	165	55	20.202	2	1	2	2	2	2	2	2	2	2	2	2	2	1	2	2	2	2	1	2	2	1	2								2	2	2
4	14	2020-06-25	2020-06-23	10.4285	14	90	2	57.876	2	1			2	166	110	39.9187	2	1	2	2	2	2	1	1	1	2	2	2	2	2	2	2	2	2	2	2	2	2	2								2	2	1
4	7	2020-05-21	2020-05-20	5.23611	14	71	2	61.516	2	1			2	170	100	34.6021	2	2	2	1	2	2	1	1	1	2	2	2	2	2	2	2	2	2	2	2	2	1	2	2019-01-08	65	0	4				2	1	1
4	8	2020-05-25	2020-05-26	7.61458	8		1	56.916		1			2	160	70	27.3438	2	1	2	2	2	2	1	1	2	2	2	2	2	2	2	2	2	2	2	2	2	2	2								2	2	1
4	4	2020-06-24	2020-06-24	0	4	44	2	49.686	2	1			2	157	60	24.3418	2	1	2	2	2	2	2	2	2	2	2	2	2	2	1	2	2	2	2	2	2	2	2								2	2	2
4	8	2020-06-25	2020-06-25	7.61736	20	52	2	55.146	2	1			2	163	75	28.2284	2	2	2	1	2	2	1	1	2	2	2	2	1	2	2	2	2	2	2	2	2	1	2								9999	9999	9999
4	1	2020-05-31	2020-05-31	-0.436111	2	80	2	46.956	2	1			2	154	60	25.2994	2	1	2	2	2	2	1	1	1	1	2	2	2	2	1	2	2	2	2	2	2	2	2	2015-11-10	45	0	2		30		1	2	1
4	1	2020-06-10	2020-06-14	0	4	69	2	47.866	2	1			2	155	75	31.2175	2	2	2	2	1	2	1	1	2	2	2	2	2	2	2	2	2	2	2	2	2	2	2								2	2	2
4	27	2020-06-09	2020-06-11	22.7625	30	88	1	64.196		1			2	168	80	28.3447	2	2	2	2	1	2	2	2	2	2	2	2	2	2	2	2	2	2	2	2	2	2	2								2	2	1
4	18	2020-06-16	2020-06-15	17.5597	20	62	1	56.916		1			2	160	120	46.875	9999	9999	9999	9999	1	2	1	2	2	2	2	2	2	2	2	2	2	2	2	2	2	2	2								2	2	2
4	13	2020-05-22	2020-06-06	8.49792	18	76	1	66.016		1			2	170	87	30.1038	2	2	2	2	1	2	1	1	2	2	2	1	2	2	2	2	2	2	2	2	2	2	2								2	2	2
4	6	2020-05-24	2020-06-10	4.1625	24	86	2	49.686	2	1			2	157	70	28.3987	9999	9999	9999	2	2	2	1	1	2	2	2	2	2	2	2	2	2	2	2	2	2	2	2	2019-09-11	60		2		30		2	2	1
4	9	2020-06-25	2020-06-24	0	10	84	1	56.006		1			2	159	80	31.6443	2	1	2	2	2	2	1	1	1	1	2	2	2	2	2	2	2	2	2	2	2	2	2	2019-07-20	35	0	4				2	2	1
4	2	2020-06-19	2020-06-19	-0.545833	3	75	1	56.916		1			2	160	85	33.2031	2	2	2	2	1	2	1	1	2	1	2	2	2	2	2	2	2	2	2	2	2	2	2	2006-06-11	35	0	4				2	1	1
9	24	2020-07-18	2020-07-29	34.6799	24	46	2	56.966	2	1			2	165	95	34.8944	2	2	2	2	1	2	1	2	2	2	2	2	2	2	2	2	2	2	2	2	2	2	2								2	2	2
9	19	2020-04-21	2020-04-18	16.3431	19	42	1	71.476		2			2	176	90	29.0548	2	9999	9999	2	1	9999	1	1	9999	9999	9999	9999	9999	2	2	2	2	2	2	2	2	2	9999								9999	9999	9999
9	65	2020-07-03	2020-07-01	0	75	47	1			2	1	9	2				2	9999	9999	9999	1	9999	2	2	2	2	2	2	2	2	2	2	2	2	2	2	2	2	2								2	9999	9999
9	26		2020-05-29	25.0931	26	31	1	64.196		2	1		2	168	70	24.8016	9999	9999	9999	9999	1	9999	9999	9999	9999	9999	9999	9999	9999	9999	9999	9999	9999		9999	9999	9999	9999	9999								9999	9999
9	22	2020-05-17	2020-05-18	25.1542	26	47	1	62.376		2	1	2	2	166	82	29.7576	2	9999	9999	9999	1	2	2	2	2	2	2	2	2	2	2	2	2	2	2	2	2	2	2								9999	9999	9999
9	18	2020-07-07	2020-07-08	11.6236	20	45	1	67.836		1			2	172	68	22.9854	9999	9999	9999	9999	1	9999	1	1	9999	9999	9999	9999	9999	9999	2	9999	9999	9999	9999	9999	9999	9999	9999								9999	9999	9999
9	13	2020-08-15	2020-08-17	10.5826	21	36	1	66.016		1			2	170	110	38.0623	2	9999	9999	2	1	2	2	2	2	2	2	2	9999	2	9999	2	2	2	2	2	2	2	2								9999	9999	9999
9	54	2020-07-12	2020-07-15	-0.478472	32	46	1	73.296		1			2	178	80	25.2493	2	9999	9999	2	1	2	1	2	2	1	2	2	2	2	9999	2	2	2	2	2	2	2	2								9999	9999	9999
9	41	2020-06-21	2020-06-23	29.0007	41	45	1	57.826		2			2	161	59	22.7615	2	9999	9999	2	1	9999	1	1	2	1	1	2	9999	2	2	2	2	2	2	2	2	2	2								9999	9999	9999
9	52	2020-09-06	2020-09-10	0	52	43	2	57.876	2	1			2	166	80	29.0318	2	2	2	2	1	2	2	2	2	2	2	2	2	2	2	2	2	2	2	2	2	2	2		65	1	1	45			2	2	1
9	5	2020-10-05	2020-10-05	4.34097	5	42	1	75.116		1			2	180	90	27.7778	2	9999	9999	2	1	9999	9999	9999	1	1	2	9999	1	9999	2	2	2	2	2	2	2	2	2								9999	9999	9999
9	56	2020-08-23	2020-09-06	56	64	57	1	56.006		1			2	159	105	41.5332	2	9999	9999	2	1	2	1	2	2	2	2	2	1	2	2	2	2	2	2	2	2	2	2								9999	9999	9999
9	11	2020-07-18	2020-07-18	11	11	34	1	64.196		2		2	2	168	63	22.3214	2	9999	9999	2	1	9999	1	2	1	1	2	2	2	2	2	2	2	2	2	2	2	2	2								9999	9999	9999
9	26	2020-06-17	2020-06-18	12	60	41	2	49.686	1	2	1	2	2	157	63	25.5588	2	9999	9999	2	1	2	1	2	2	2	2	2	2	2	2	2	2	2	2	2	2	2	2								2	2	2
9	21	2020-10-19	2020-10-22	28	39	50	1	91.496		2	1	5	2	198	91	23.2119	2	9999	9999	2	1	2	1	2	2	2	2	2	1	1	2	2	2	2	2	2	2	2	2								2	2	2
[truncated: 940 more columns]

## Sheet: codings
1	King Faisal Specialist Hospital & Research Centre-Riyadh	Site of COVID-19 Test	Nationality	Did the case travel outside of Saudi?	Current smoker	Right ventricular dysfunction (strain, dilatation or dysfunction)	If yes to Anticoagulation, specify	Hospital admission source	which of the following inotropes/vasopressors were used (record maximum dose used in the first 24h of hospital admission) (choice=Vasopressin)	If yes to cough, what is the type	Vasopressin	H.1.2 Was the patient started on HFNC?	H.2.7.Did the patient undergo any of the following	I.1 Chest X ray (CXR) finding during ICU stay (from ICU	Right ventricle/pulmonary artery pressure available	Type of Pulmory embolism (choice=Pulm trunck)	3rd CT findings (choice=Grou Glass Opacity)	Blood group	K.2 Atypical pneumonia PCR done	K.4.1.4 Pathogen Detected (if positive) (choice=Gram positive bacteria (no specific resistance pattern))	Medication	L.2 Anticoagulation administration during hospitalization:(choose all given from hospital admission till day 28 of ICU admission) (choice=None of the below)	L.2.1 Indication for anticoagulation: (choice=DVT prophylaxis only)	L.3 Corticosteroids during ICU stay:	M.1 Gastrointestinal bleeding	M.17.1 If yes to Cardiac arrhythmia:	N.Extra Corporeal Membrane Oxygenation (ECMO) used during ICU admission?	N.3.4 Initial ECMO Mode:	N.5. Mode of ventilation 2h pre-ECMO	N.7 Did the patient undergo conversion (change) of ECMO mode:	N.8.7 Prone positioning during ECMO	N.12.2 Oxygenator failure requiring circuit change:	O.1 Was the patient deemed DNAR (do not attempt
2	King Faisal Specialist Hospital & Research Centre-Jeddah	1 Nasopharyngeal Swab	1 indian	1 Yes	1 Yes	1 Yes	1 Warfarin	1 Home	0 No	1 Dry cough "no sputum"	1 Yes	1 Yes	therapies while on mechanical ventilation (MV)?	admission until ICU discharge)	1 Right ventricular systolic pressure available	1 Yes	1 Yes	1 A+	1 Yes	1 Yes	Hydroxychloroquine	1 Yes	1 Yes	1 Yes	1 Yes	1 SVT (supra-ventricular tachycardia)	1 Yes	1 VV ECMO	1 PC	1 Yes	1 Yes	1 Yes	resuscitation = no CPR)?
3	King Abdulaziz Medical City, National Guard Hospital-Riyadh	2 Sputum/Tracheal Aspirate	2 pakistani	2 No	2 No	0 No	2 NOAC	2 Nursing home	1 Yes	2 With sputum production	2 No	0 No	Paralysis infusion		2 Pulmonary Artery Systolic pressure available	0 No	0 No	2 A -	0 No	0 No	1 Yes	0 No	0 No	0 No	2 No	2 A fib (atrial fibrillation)	0 No	2 VA ECMO	2 VC	0 No	0 No	0 No	1 Yes
4	Military Medical Services-Riyadh	3 BAL- Bronchoalveolar Lavage	3 bengali	9999 Not documented and not available	9999 Not documented and not available		3 LMWH	3 Transfer from other facility		3 Bloody sputum (haemoptysis)			1 Yes	Day 3	3 Pulmonary artery mean pressure available			3 B+			2 No					3 VT ( ventricular tachycardia)		3 VAV ECMO	3 PS				0 No
5	Alhabeeb Medical Group (HMG)	4 Other	4 GCC				4 Fondaparinux	4 Other		88888 Unknown			2 No	1 Consolidation present	4 Normal (no specific number written in the report)			4 B-	If yes:							4 VF (ventricular fibrillation)		4 ECCO2R	4 PRVC
6	King Saud University/King Khalid University Hospital	9999 Not documented and not available	5 yamani		SAME VALUES AS ABOVE	Right ventricle/pulmonary artery pressure available			SAME VALUES AS ABOVE		SAME VALUES AS ABOVE	SAME VALUES AS ABOVE		2 Consolidation absent	5 Other	SAME VALUES AS ABOVE	SAME VALUES AS ABOVE	5 AB+	If yes: (choice=Negative)	SAME VALUES AS ABOVE		SAME VALUES AS ABOVE	SAME VALUES AS ABOVE	SAME VALUES AS ABOVE	SAME VALUES AS ABOVE		N.3.1. indication for ECMO insertion:	5 ECPR	5 SIMV	N.7.1 ECMO mode was change (from-to):	N.10. Mode of ventilation:	N.12.3 Bleeding from cannulation site
7	King Fahd Hospital of the University-Dammam		6 sudanese	Was the case in close contact with a person with fever	Diabetes	1 Right ventricular systolic pressure available			which of the following inotropes/vasopressors were used (record maximum dose used in the first 24h of hospital admission) (choice=Epinephrine)		Epinephrine	Was the patient started on BiPAP?		3 Not done within 24 hours		Type of Pulmory embolism (choice=Main pulm artery)	3rd CT findings (choice=Crazy paving)	6 AB-	1 Yes	K.4.1.4 Pathogen Detected (if positive) (choice=Vancomycin resistant Enterococcus (VRE))	SAME VALUES AS ABOVE	L.2 Anticoagulation administration during hospitalization:(choose all given from hospital admission till day 28 of ICU admission) (choice=Heparin SC)	L.2.1 Indication for anticoagulation: (choice=ECMO protocol)	L.3 If yes, (you can choose >1): (choice=Hydrocortisone)	M.2 Pulmory embolism		1 Hypoxemic respiratory failure		6 HFOV	1 VV to VA	1 PC	1 Yes	SAME VALUES AS ABOVE
8	Prince Mohammed bin Abdulaziz hospital-Riyadh		7 Filibino	and/or cough who has been to an affected area?	Hypertension	2 Pulmonary Artery Systolic pressure available	If yes to Antiplatelet, specify (choice=Aspirin)	Maximum Oxygen therapy required	which of the following inotropes/vasopressors were used (record maximum dose used in the first 24h of hospital admission) (choice=Norepinephrine)	Blood pressure unit	Norepinephrine	Was awake prone positioning performed?	SAME VALUES AS ABOVE			Type of Pulmory embolism (choice=Segmental)	3rd CT findings (choice=Multifocal infiltrate)	7 O+	0 No	K.4.1.4 Pathogen Detected (if positive) (choice=Staph aureus (MSSA))	chloroquine	L.2 Anticoagulation administration during hospitalization:(choose all given from hospital admission till day 28 of ICU admission) (choice=Heparin infusion)	L.2.1 Indication for anticoagulation: (choice=PE (history of PE prior to hospital admission))	L.3 If yes, (you can choose >1): (choice=Methylprednisolone)	M.3 Pneumothorax/emphysema	M.20 CRRT circuit clotting	2 Cardiogenic shock		7 APRV	2 VV to VAV	2 VC	0 No	O.2 Tracheostomy was performed
9	King Saud Medical City (KSMC)-Riyadh	Gender	8 Palastini	1 Yes	Ischemic heart disease	3 Pulmonary artery mean pressure available	0 No	1 Nil	which of the following inotropes/vasopressors were used (record maximum dose used in the first 24h of hospital admission) (choice=Dopamine)	1 MAP	Dopamine		Recruitment manoeuvres		RV dysfunction (strain, dilatation, or dysfunction)	Type of Pulmory embolism (choice=Subsegmental)	3rd CT findings (choice=Unilateral infiltrate)	8 O-		K.4.1.4 Pathogen Detected (if positive) (choice=Staph aureus (MRSA))	Azithromycin	L.2 Anticoagulation administration during hospitalization:(choose all given from hospital admission till day 28 of ICU admission) (choice=Warfarin)	L.2.1 Indication for anticoagulation: (choice=PE (diagnosed during current admission))	L.3 If yes, (you can choose >1): (choice=Dexamethasone)	M.4 Stroke	1 Yes	3 Other	N 3.5 Did the patient uergo prone positioning within 24 hrs of ECMO initiation?	8 Other	3 VA to VV	3 PS		O.3 Microbiological cure (defined as 2 consecutive samples negative COVID 19 test)?
10	Qatif Central Hospital	1 Male	9 egypt	2 No	Heart failure (ejection fraction < 50%)	4 Normal (no specific number written in the report)	1 Yes	2 1-3 L/min nasal cannula (NC)	which of the following inotropes/vasopressors were used (record maximum dose used in the first 24h of hospital admission) (choice=Dobutamine)	2 SBP/DBP	Dobutamine		Inhaled NO	SAME VALUES AS ABOVE	1 Yes	Type of Pulmory embolism (choice=Not available)	3rd CT findings (choice=Pleural effusion)			K.4.1.4 Pathogen Detected (if positive) (choice=Enterobacteriaceae (sensitive))	Kaletra (Lopinavir/Ritonavir)	L.2 Anticoagulation administration during hospitalization:(choose all given from hospital admission till day 28 of ICU admission) (choice=NOAC)	L.2.1 Indication for anticoagulation: (choice=DVT (history of DVT prior to current admission))	L.3 If yes, (you can choose >1): (choice=Prednisone)	M.5 Cardiac ischaemia/infarction	0 No		1 Yes		4 VAV to VV	4 PRVC
11	Abha Central Hospital	2 Female	10 jordan	9999 Not documented and not available	Chronic Lung disease	5 other		3 >4 L/min NC	which of the following inotropes/vasopressors were used (record maximum dose used in the first 24h of hospital admission) (choice=Phenylephrine)		Phenylephrine	Total duration for prone positioning	Prone positioning	Day 7	0 No	Type of Pulmory embolism (choice=Not applicable)	3rd CT findings (choice=Pulmory embolism)		SAME VALUES AS ABOVE	K.4.1.4 Pathogen Detected (if positive) (choice=Enterobacteriaceae (ESBL))	Favipiravir	L.2 Anticoagulation administration during hospitalization:(choose all given from hospital admission till day 28 of ICU admission) (choice=Fondaparunix)	L.2.1 Indication for anticoagulation: (choice=DVT (New diagnosed during current hospital admission))	L.3 If yes, (you can choose >1): (choice=Other)	M.6 Bowel ischemia			0 No		5 VA to VAV	5 SIMV	N.13. ECMO outcome:
12	King Fahad Hospital- Madina		11 syrian		Chronic obstructive pulmory disease (COPD)			4 Face mask (FM)			Other	1 ≤4	Airway pressure release ventilation (APRV)	Day 14		Type of Pulmory embolism (choice=Temporarily unavailable)	3rd CT findings (choice=Other)	Check fibrinogen unit	If yes: (choice=Mycoplasma Pneumoniae, Positive)	K.4.1.4 Pathogen Detected (if positive) (choice=Enterobacteriaceae (CRE))	Remdesivir	L.2 Anticoagulation administration during hospitalization:(choose all given from hospital admission till day 28 of ICU admission) (choice=LMWH (any of: enoxaparin, Tinzaparin, Dalteparin))	L.2.1 Indication for anticoagulation: (choice=Atrial fibrillation)	L.3 If yes, (you can choose >1): (choice=Not available)	M.7 Venous thrombosis (upper body, subclavian a interl jugular)		N.3.2. Cannulation procedure:		N.5 Was the patient on Vasopressors/Inotropes 2hrs pre-ECMO?	6 VAV to VA	6 HFOV	1 Successful decannulation	O.4 At 28 days of ICU stay, the patient is:
13	Ohud hospital-Madina		12 afgan		Bronchial asthma		SAME VALUES AS ABOVE	5 Non-rebreather mask		Was Chest X-Ray done?		2 >4	High Frequency oscillatory ventilation (HFOV)	Day 21		Type of Pulmory embolism (choice=nown)	3rd CT findings (choice=Not available)	1 mg/dL	If yes: (choice=Legionella Pneumophila, Positive)	K.4.1.4 Pathogen Detected (if positive) (choice=Enterobacteriaceae (MDR))	Ribavirin	L.2 Anticoagulation administration during hospitalization:(choose all given from hospital admission till day 28 of ICU admission) (choice=Not available)	L.2.1 Indication for anticoagulation: (choice=Mechanical valve)	L.3 If yes, (you can choose >1): (choice=Not applicable)	M.8 Lower limb DVT	SAME VALUES AS ABOVE	1 Percutaneous		1 Yes		7 APRV	2 Withdrawal of ECMO support	1 Still in ICU, ventilated
14	Al-Noor Specialist Hospital- Mekkah	If female, pregnant?	13 lebanese	Has the case attended an event where a large number	Chronic liver disease	ACEI	If yes to Antiplatelet, specify (choice=Clopidogrel (plavix))	6 High flow nasal oxygen (HFNO)	Epinephrine unit	1 Yes					I.3 Was CT chest performed during hospital admission?		3rd CT findings (choice=Not applicable)	2 g/L	If yes: (choice=Bordetella pertussis, Positive)	K.4.1.4 Pathogen Detected (if positive) (choice=Enterobacteriaceae (XDR))	IVIG	L.2 Anticoagulation administration during hospitalization:(choose all given from hospital admission till day 28 of ICU admission) (choice=Not applicable)	L.2.1 Indication for anticoagulation: (choice=Past history of thrombo-embolic disease)	L.3 If yes, (you can choose >1): (choice=Temporarily unavailable)	M.9 Thrombosis: abdomil veins (e.g: portal vein)	M.21 intracerebral bleeding	2 Cutdown	N.4. Mode of ventilation 12h pre-ECMO:	0 No		8 Other	3 Death	2 Still in ICU, not ventilated
15	Alzaher hospital-Mekkah	1 Yes	14 manymar/borma	of people were present (i.e, wedding, Umrah)?	Hemoglobinopathy	1 Yes	If yes to Antiplatelet, specify (choice=Ticagrelor (Berlanta))	7 Non-invasive positive pressure ventilation/BiPAP	1 mcg/kg/min	0 No	Epinephrine unit:				1 Yes		3rd CT findings (choice=Temporarily unavailable)			K.4.1.4 Pathogen Detected (if positive) (choice=Pseudomos (Sensitive))	Interferon	L.2 Anticoagulation administration during hospitalization:(choose all given from hospital admission till day 28 of ICU admission) (choice=Temporarily unavailable)	L.2.1 Indication for anticoagulation: (choice=Part of COVID 19 therapy protocol)	L.3 If yes, (you can choose >1): (choice=unknown)	M.10 Cardiac arrest	M.22 Other complications and or outcome		1 PC		N.7.2. Was ECMO configuration changed again?			3 Discharged from ICU
16	King Abdullah Medical Complex- Jeddah	2 No	15 nepal	1 Yes	Chronic kidney disease (GFR < 60ml/min)	2 No		8 Intubation and mechanical ventilation	2 mcg/min		1 mcg/kg/min	Was inhaled NO used before intubation?		I.1.2. Location of infiltrate	0 No	2nd CT findings (choice=Grou Glass Opacity)	3rd CT findings (choice=nown)			K.4.1.4 Pathogen Detected (if positive) (choice=Pseudomos (MDR))	Ostilomavir (Tamiflu)	L.2 Anticoagulation administration during hospitalization:(choose all given from hospital admission till day 28 of ICU admission) (choice=unknown)	L.2.1 Indication for anticoagulation: (choice=Current maligncy)		M.11 Self-Extubation			2 VC		1 Yes
17	Imam Abdulrahman Alfaisal-Riyadh		16 moritania	2 No	Renal replacement therapy (dialysis)	9999 Not documented and not available					2 mcg/min	1 Yes				1 Yes		CK unit	K.3 MERS-CoV1 PCR done	K.4.1.4 Pathogen Detected (if positive) (choice=Pseudomos (XDR))	B-lactam/B-lactamase inhibitor (tazocin, Amoxicillin /		L.2.1 Indication for anticoagulation: (choice=Other)		M.12 Bleeding requiring blood transfusion		N.3.3 ECMO insertion location	3 PS	N.5 Was the patient on Vasopressin 12hrs pre-ECMO?	0 No	other variables follow with the same values	ECMO complete?
18	King Fahad Medical City (KFMC)-Riyadh		17 chad	9999 Not documented and not available	Post solid organ/bone marrow transplant		If yes to Corticosteroids, specify medication me			Chest X-ray - Consolidation		0 No		Day 3		0 No		1 U/L	1 Yes	K.4.1.4 Pathogen Detected (if positive) (choice=Acinetobacter (sensitive))	clavulanate, Ampicillin / sulbactam)		L.2.1 Indication for anticoagulation: (choice=Not available)	L.3 Was the Hydrocortisone dose changed?	M.13 Rhabdomyolysis (CK>1000)	Complications and outcome at discharge or 28 day complete?	1 Same center the patient is in now	4 PRVC	1 Yes			0 Incomplete	O.5.2 ICU discharge outcome:
19	King Abdullah Medical City- Makkah	Nationality?	18 senegal		Immunocompromised status	SAME VALUES AS ABOVE	1 Prednisolone	Hypotension requiring inotropes/vasopressors	SAME VALUES AS ABOVE	1 Present				1 Unilateral	1st CT findings (choice=Grou Glass Opacity)		Type of Pulmory embolism (choice=Pulm trunck)	2 ukat/L	0 No	K.4.1.4 Pathogen Detected (if positive) (choice=Acinetobacter (MDR))	Cephalosporine (ceftazidime, ceftriaxone, cefazolin,	If LMWH: (choose one)	L.2.1 Indication for anticoagulation: (choice=Not applicable)	1 Yes	M.14 Seizure(s)		2 Another hospital then transported to this center	5 SIMV	0 No			1 Unverified	1 Discharged to floor
20	King Fahd hospital- Jeddah	1 Saudi	19 eriteria		Chronic hematologic disease	ARB	2 Hydrocortisone	0 No	Norepinephrine unit	2 Absent	SAME VALUES AS ABOVE			2 Bilateral	1 Yes		1 Yes			K.4.1.4 Pathogen Detected (if positive) (choice=Aspergillus)	cefuroxime, cefepime)	1 Enoxaparin	L.2.1 Indication for anticoagulation: (choice=Temporarily unavailable)	0 No	M.15 Falls	0 Incomplete		6 HFOV		choose (from- to) of ECMO mode change:		2 Complete	2 Transfer to another facility
21	King Fahad specialist Hospital-Tabuk	2 Non Saudi	20 seychel ilands	Nosocomial infection (COVID 19 positive for inpatient	HIV/AIDS	Anticoagulation	3 Dexamethasone	1 Yes	Dopamine unit		Norepinephrine unit	Was the patient ever intubated and mechanically			0 No	SAME VALUES AS ABOVE	0 No			K.4.1.4 Pathogen Detected (if positive) (choice=Candida)	Carbapenem (Meropenem, Imipenem, Ertapenem)	2 Tinzaparin	L.2.1 Indication for anticoagulation: (choice=unknown)		M.16 Accidental line/feeding tube removal	1 Unverified		7 APRV		1 VAV to VV			3 Discharge home
22	King Abdulaziz University Hospital-Jeddah		21 indonesia	previously admitted with another diagnosis)	Malignt neoplasm/cancer	Antiplatelet	4 Prednisolone/Fludrocortisone		Dobutamine unit		Dopamine unit	ventilated during this hospital admission				2nd CT findings (choice=Crazy paving)		Triglycerides unit	If yes: (MERS-CoV was +ve/-ve)	K.4.1.4 Pathogen Detected (if positive) (choice=Other)	Aminoglycosides (Gentamycin, Amikacin, Tobramycin)	3 Dalteparin			M.17 Cardiac arrhythmia	2 Complete	N 3.3.1 type of transportation	8 Other	N.6.1 PRBCs	2 VAV to VA			4 Death
23	Buradia Central Hospital	Legal/illegal	22 srilanka	1 Yes	Recent surgery (within 30 days)	Non-steroidal anti-inflammatory (NSAID)			Phenylephrine unit	If present, Location of infiltrate:	Dobutamine unit	1 Yes		SAME VALUES AS ABOVE		2nd CT findings (choice=Multifocal infiltrate)		1 mmol/L	1 Negative	K.4.1.4 Pathogen Detected (if positive) (choice=Not available)	Colistin			SAME VALUES AS ABOVE	M.18 Bed sores (> stage 1)		1 Ground transport		1 Yes
24	HMG Suaidi	1 legal	23 ethiopia	2 No	Dyslipidemia	Insulin therapy				1 Unilateral	Phenylephrine unit	0 No		Day 7	SAME VALUES AS ABOVE	2nd CT findings (choice=Unilateral infiltrate)	SAME VALUES AS ABOVE	2 mg/dl	2 Positive	K.4.1.4 Pathogen Detected (if positive) (choice=Not applicable)	Ceftalazone -avibactam			L.3 Was the Methylprednisolone dose changed?	M.19 Arterial limb ischemia		2 Air medical transport		0 No
25	HMG Olaya	2 illegal	24 canada/usA	9999 Not documented and not available	Stroke	Corticosteroids	If yes to other anti-hypertensive agent , specify: (choice=Beta blocker)			2 Bilateral				Day 14	1st CT findings (choice=Crazy paving)	2nd CT findings (choice=Pleural effusion)	Type of Pulmory embolism (choice=Main pulm artery)			K.4.1.4 Pathogen Detected (if positive) (choice=Temporarily unavailable)	Ceftazidime-tazobactam	L.2 LMWH Frequency:		L.3 Was the Methylprednisolone dose changed again?	M.20 Use of renal replacement therapy (dialysis)			N.4 Was the patient on Vasopressors/Inotropes 12hrs pre-ECMO?		N.8.1 MV Mode:			O.6.2 Hospital discharge outcome:
26	HMG Rayan		25 turkish			Chemotherapy currently or in the last 3 months	0 No		Duration of symptoms prior to hospital admission					Day 21	1st CT findings (choice=Multifocal infiltrate)	2nd CT findings (choice=Pulmory embolism)	Type of Pulmory embolism (choice=Segmental)			K.4.1.4 Pathogen Detected (if positive) (choice=unknown)	Vancomycin	1 Daily		L.3 Was Prednisone dose changed?				1 Yes		1 PC			1 Transfer to another facility
27	HMG takassusi		26 singapore			Immunotherapy (i.e., calcineurin inhibitors,	1 Yes		1 less than 3 days		Did the patient arrive to the hospital intubated?	H.2.3 Maximum Oxygen therapy within 6 hrs prior to intubation			1st CT findings (choice=Unilateral infiltrate)	2nd CT findings (choice=Other)	Type of Pulmory embolism (choice=Subsegmental)	K.1 Viral PCR done	K.4.1.2 Biospecimen Type		linezolid	2 BID						0 No	SAME VALUES AS ABOVE	2 VC			2 Discharge home alive
		Healthcare worker	27 serbian	No clear source		monoclonal antibodies, thymoglobulin, anti-proliferative)			2 3-5 days	F.1 Reason of ICU admission (choice=Shock)	1 Yes	1 NC			1st CT findings (choice=Pleural effusion)	2nd CT findings (choice=Not available)	Type of Pulmory embolism (choice=Not available)	1 Yes	1 Respiratory culture/tracheal aspirate		Antifungal								N.6.2. FFPs	3 Other			3 Death
		1 Yes		1 Yes		Other anti-hypertensive agent			3 6-8 days	0 No	0 No	2 Face mask		I.2 Echocardiography done during hospitalization	1st CT findings (choice=Pulmory embolism)	2nd CT findings (choice=Not applicable)	Type of Pulmory embolism (choice=Not applicable)	0 No	2 Sputum	Microbiological testing complete?	Tocilizumab								N.6.3. Platelets
		2 No		2 No			SAME VALUES AS ABOVE		4 More than 8 days	1 Yes		3 Non-rebreather mask		1 Yes	1st CT findings (choice=Other)	2nd CT findings (choice=Temporarily unavailable)	Type of Pulmory embolism (choice=Temporarily unavailable)		3 BAL	0 Incomplete	Convalescent plasma	L.2 Was LMWH dose changed?						N.4 Was the patient on Vasopressin 12hrs pre-ECMO?	N.6.4. Cryoprecipitate
				9999 Not documented and not available			If yes to other anti-hypertensive agent , specify: (choice=Calcium channel blocker)		88888 Unknown			4 HFNO		0 No	1st CT findings (choice=Not available)	2nd CT findings (choice=nown)	Type of Pulmory embolism (choice=nown)		4 Blood	1 Unverified	Plasmapheresis	1 Yes						1 Yes	N.6.5. Factor VII
							If yes to other anti-hypertensive agent , specify: (choice=Diuretic)				H1.1: did the patient require: (choice=No oxygen supply was needed)	5 CPAP			1st CT findings (choice=Not applicable)			If yes:	5 Urine	2 Complete	Anakinra	0 No						0 No	N.6.6. Tranexamic acid
										SAME VALUES AS ABOVE	0 No	6 BiPAP			1st CT findings (choice=Temporarily uvailable)			If yes: (choice=Negative)			Sildenafil								N.6.7. Prothrombin complex concentration
									Asymptomatic (No symptoms at presentation)	F.1 Reason of ICU admission (choice=Respiratory failure)	1 Yes			RV dysfunction (strain, dilatation, or dysfunction)	1st CT findings (choice=nown)	Type of Pulmory embolism (choice=Pulm trunck)		1 Yes			Ilioprost inhalation
									1 Yes	F.1 Reason of ICU admission (choice=Decrease level of consciousness)				1 Yes		1 Yes		0 No	K.4.1.3 Result			L.2 The new LMWH dose frequency:
									2 No	F.1 Reason of ICU admission (choice=Other)		H.2.4 was ABG done prior to intubation (within 6h)		0 No		0 No			1 Negative			1 Daily
									9999 Not documented and not available		SAME VALUES AS ABOVE	1 Yes							2 Positive			2 BID
											H1.1: did the patient require: (choice=NC)	0 No						SAME VALUES AS ABOVE
										F.4 Mode of oxygen delivery at same time of gas sampling	H1.1: did the patient require: (choice=FM)					SAME VALUES AS ABOVE		If yes: (choice=A/H3N2, Positive)
									SAME VALUES AS ABOVE	1 Nil	H1.1: did the patient require: (choice=NRM (non rebreather mask))					Type of Pulmory embolism (choice=Main pulm artery)		If yes: (choice=A/H1N1pdm09, Positive)
									Shortness of breath (Dyspnoea)	2 Nasal cannula (NC)	H1.1: did the patient require: (choice=Not available)	Mode mechanical ventilation				Type of Pulmory embolism (choice=Segmental)		If yes: (choice=A/H7N9, Positive)
									Runny nose (rhinorrhoea)	3 Face mask (FM)	H1.1: did the patient require: (choice=Not applicable)	1 PC				Type of Pulmory embolism (choice=Subsegmental)		If yes: (choice=A/H5N1, Positive)
									Gastrointestinal (Diarrhoea/vomiting)	4 Non-rebreather mask (NRM)	H1.1: did the patient require: (choice=Temporarily uvailable)	2 VC				Type of Pulmory embolism (choice=Not available)		If yes: (choice=Influenza A, Positive)
									History of fever	5 High flow nasal oxygen (HFNO)	H1.1: did the patient require: (choice=nown)	3 PRVC				Type of Pulmory embolism (choice=Not applicable)		If yes: (choice=Influenza B, Positive)
									Altered consciousness/confusion	6 Non-invasive positive pressure ventilation/BiPAP		4 PS				Type of Pulmory embolism (choice=Temporarily unavailable)
									Cough	7 Mechanical ventilation		5 other				Type of Pulmory embolism (choice=nown)
									Abdominal pain
									Chest pain
									Seizures
									Headache
									Joint pain (Arthralgia)
									Muscle aches (Myalgia)
									Fatigue/Malaise
									Sore throat
									Dizziness
									Others

## Sheet: Sheet4
deleted colomns					cleaned					half cleaned		added /changed			added codes					ECMO data (N)
Site of COVID-19 Test					ICU LOS (d)					MV duration		Antiplatelet, medication	in home medication		antiplatelet					many deleted (almost all)
Dyslipidemia					Hospital LOS (d)										0 none
Stroke					Age (years)										1 aspirin					ECMO complete?	N3.5 Did the patient uergo prone positioning within 24 hrs of ECMO initiation?
If yes to Antiplatelet, specify (choice=Aspirin)															2 clopidogril					N.12.4 Complication specification	If death, what is the reason of death:
If yes to Antiplatelet, specify (choice=Clopidogrel (plavix))					If yes to other anti-hypertensive agent , specify: (choice=Beta blocker)	removed the 0 (as patient is not taking)									3 aspirin+clopedogril
If yes to Antiplatelet, specify (choice=Ticagrelor (Berlanta))					If yes to other anti-hypertensive agent , specify: (choice=Calcium channel blocker)	removed the 0 (as patient is not taking)									4 tecaglirolol
Anticoagulation	replaced by (anticoagulationas combined )				If yes to other anti-hypertensive agent , specify: (choice=Diuretic)	removed the 0 (as patient is not taking)									9999 unkown
Epinephrine unit					If transferred from another facility, then the admission date in the referring facility	BN-BR						If yes to Anticoagulation, specify--> changed to (anticoagulation )			added to the code (0 none)
Norepinephrine unit					Maximum Oxygen therapy required
Dopamine unit					If yes to Face Mask, then how many L/min
Dobutamine unit					If yes to high flow sal oxygen (HFNO), then FiO2 %
Phenylephrine unit					If yes to high flow sal oxygen (HFNO) , then how many L/min
						CA
anorexia	loss of taste/smell	Dizziness			Epinephrine (maximum dose)(Mcg/kg/min)	Norepinephrine (maximum dose)	Dopamine (maximum dose)	Dobutamine (mcg/kg/min)	Phenylephrine (maximum dose)
Others
					HospitalAdmissionDataMean BP(mmHg)	at hospital admission (title changedto includethe time line)
Blood pressure SBP (mmHg)	Blood pressure DBP (mmHg)				Heart rate (beats/minute)	Respiratory rate (breaths/minute)
Blood pressure unit	at hospital admission				Oxygen saturation (on room air) (%)
E.2.1 Blood pressure unit	at ICUadmissoin				Glasgow Coma Score (GCS /15)
Blood pressure SBP	Blood pressure DBP
day 1					E.2.1ICU AdmissionData MeanBP	E.2.2 Heart rate
Epinephrine unit:	Norepinephrine unit	Dopamine unit	day 1		E.2.3 Respiratory rate	E.2.4 Temperature (highest in the first 24 hours)	E.2.5 Glasgow Coma Score (GCS /15)
Dobutamine unit	Phenylephrine unit	other
					ICU admission PH value	PCO2 value	PaO2 value	F.3 O2 Saturation				po2(ABG)/fio2 ratio (if on MV/BiPAP)	ROX index score,if on HFNC(spo2/fio2)/RR
Epinephrine unit:	Norepinephrine unit	Dopamine unit	day2									corrected the names in colomns EC-EF (highlighted in red)
Dobutamine unit	Phenylephrine unit
		Other			also the number of the date is added								colomn KP
Epinephrine unit	Norepinephrine unit	Dopamine unit	day3		Day1Epi(mcg/kg/min)	Day1NorEpi (mcg/kg/min)	Day1Dopa (mcg/kg/min)	Day1Dobut(mcg/kg/min)	Day1Phenyl(mcg/min)			PreIntubationpo2/fio2 ratio (if on BiPAP/HFNC)	PreIntubationSaturation/fio2 ratio (if no ABG or Po2 available)
Dobutamine unit	Phenylephrine unit	Other			number of days are added to the colomns of days (font is red)
												Day1MV PO2/Fio2 (mmHg)
					Day2Epi (mcg/kg/min)	Day2NorEpi (mcg/kg/min)	Day2Dopa (mcg/kg/min)	Dobutamine value	Day2Phenyl(mcg/min)
Other	Epinephrine unit	Norepinephrine unit	Dopamine unit	day4
Dobutamine unit	Phenylephrine unit
					Day3Epi (mcg/kg/min)	Day3NorEpi (mcg/kg/min)	Day3Dopa (mcg/kg/min)	Day3Dobutamine value
					Day3Phenylephrine value
Other	Epinephrine unit	Norepinephrine unit	day 5		Epinephrine value	Norepinephrine value
Dopamine unit	Dobutamine unit	Phenylephrine unit			Epinephrine value(mcg/kg/min)	Norepinephrine value(mcg/kg/min)
Other	Epinephrine unit	Norepinephrine unit			Epinephrine value	Norepinephrine value(mcg/kg/min)
Dopamine unit	Dobutamine unit	Phenylephrine unit
Other	Epinephrine unit	Norepinephrine unit			Epinephrine value(mcg/kg/min)	Norepinephrine value(mcg/kg/min)
Dopamine unit	Dobutamine unit	Phenylephrine unit			Epinephrine value(mcg/kg/min)	Norepinephrine value(mcg/kg/min)
					Epinephrine value(mcg/kg/min)	Norepinephrine value(mcg/kg/min)
Other	Epinephrine unit	Norepinephrine unit			Epinephrine value(mcg/kg/min)	Norepinephrine value(mcg/kg/min)
Dopamine unit	Dobutamine unit	Phenylephrine unit
Other	Epinephrine unit	Norepinephrine unit
Dopamine unit	Dobutamine unit	Phenylephrine unit
Other	Epinephrine unit	Norepinephrine unit
Dopamine unit	Dobutamine unit	Phenylephrine unit
			below (hemodynamics for days 17/19/21 to be deleted, which will make only 15 days of icu admission data)
G.1 Temperature (highest) (oC)	G.3 Mean arterial pressure (MAP) (10 am)	Vasopressin	Epinephrine	Norepinephrine	Dopamine	Dobutamine	Phenylephrine	Other	Epinephrine unit	Epinephrine value	Norepinephrine unit	Norepinephrine value	Dopamine unit	Dopamine value	Dobutamine unit	Dobutamine value	Phenylephrine unit	Phenylephrine value	G.1 Temperature (highest) (oC)	G.3 Mean arterial pressure (MAP) (10 am)	Vasopressin	Epinephrine	Norepinephrine	Dopamine	Dobutamine	Phenylephrine	Other	Epinephrine unit	Epinephrine value	Norepinephrine unit	Norepinephrine value	Dopamine unit	Dopamine value	Dobutamine unit	Dobutamine value	Phenylephrine unit	Phenylephrine value	G.1 Temperature (highest) (oC)	G.3 Mean arterial pressure (MAP) (10 am)	Vasopressin	Epinephrine	Norepinephrine	Dopamine	Dobutamine	Phenylephrine	Other	Epinephrine unit	Epinephrine value	Norepinephrine unit
H1.1: did the patient require: (choice=Not available)	H1.1: did the patient require: (choice=Not applicable)	H1.1: did the patient require: (choice=Temporarily unavailable)	H1.1: did the patient require: (choice=unknown)		If the patient started on HFNC, what was the duration in days	names corrected of colomns( font is red)
					H1.2HFNCMaximum flow (L/min)	H1.2HFNCMaximum FIO2 (%)
					If the patient started on BiPAP, what was the duration in days
					Duration of prone positioning in days
					Per day Total duration for awake prone positioning (hours)	only corrected the title
					H.2.2 Lowest oxygen Saturation 6 hrs prior to intubation (%)
					Maximum Oxygen therapy 6 hrs prior to intubation (FiO2 %)
					Maximum Oxygen therapy 6 hrs prior to intubation (Flow)
					H.2.4 ABG prior to intubation (within 6h) PH value
					H.2.4 ABG prior to intubation (within 6h) PCO2 value (mmHg)
					H.2.4 ABG prior to intubation (within 6h) PO2 value (mmHg)
					H.2.4 O2 saturation prior to intubation (%)
					PCO2 value on ABG (mmHg)							Day1MV PO2/ABG (mmHg)
					Peak pressure (cmH2O)
					Plateau pressure (if available) (cmH2O)
					PEEP (cmH2O)
					FiO2 (%)
					Tidal volume (ml)
					Respiratory rate (breaths/min)
					Day2PO2 value on ABG (mmHg)							Day 2 Po2/Fio2
					Day2PCO2 value on ABG (mmHg)
					Peak pressure (cmH2O)	Platuea Pressure (cmH2O) (if available)	PEEP (cmH2O)
					FiO2 ( % )	Tidal volume (ml)	Respiratory rate
					Day3PO2 value on ABG (mmHg)	day3PCO2 value on ABG (mmHg)	Mode mechanical ventilation	Peak pressure (cmH2O)				Day3PO2/Fio2 ratio
					Platuea Pressure (if available) (cmH2O)	PEEP (cmH2O)	FiO2 (%)	Tidal volume (ml)	Respiratory rate (breaths/min)			Day4PO2/Fio2 value on ABG:
												Day5MVPo2/Fio2 ratio
					Day4PO2 value on ABG:	Day4PCO2 value on ABG:
					PO2 value on ABG (mmHg):	FiO2 ( % )	PCO2 value on ABG (mmHg):					absolute neutrophils/Lymphocyte ratio
					ALL The Laboratorydata were cleaned							names corected forCXR finding
CK unit	Check fibrinogen unit											Day 3Consolidtion	Day 7Consolidtion	Day 14Consolidtion	Day 21Consolidtion
not needed/ no additional value
I.2.2. Date of 2nd Echocardiography	2nd Ejection Fraction (%)	RV dysfunction (strain, dilatation, or dysfunction)
Right ventricle/pulmory artery pressure available	Right ventricular systolic pressure (mmHg)	Pulmory Artery Systolic pressure (mmHg)	Mean pulmory pressure (mmHg)									Day 3InfiltrateLocation	Day 7InfiltrateLocation	Day 14InfiltrateLocation	Day 21InfiltrateLocation
Date of 3rd Echocardiography	3rd Ejection Fraction (%)	RV dysfunction (stain, dilatation, or dysfunction)
Right ventricle/pulmory artery pressure available	Right ventricular systolic pressure (mmHg)	Pulmory Artery Systolic pressure (mmHg)
1st CT findings (choice=Not available)	1st CT findings (choice=Not applicable)	1st CT findings (choice=Temporarily uvailable)	1st CT findings (choice=nown)		1st CT findings (choice=Grou Glass Opacity)	1st CT findings (choice=Crazy paving)	1st CT findings (choice=Multifocal infiltrate)	1st CT findings (choice=Unilateral infiltrate)	1st CT findings (choice=Pleural effusion)			2nd and 3rd CT findings were combined together
					1st CT findings (choice=Pulmory embolism)	1st CT findings (choice=Other)	Type of Pulmory embolism (choice=Pulm trunck)	Type of Pulmory embolism (choice=Main pulm artery)	Type of Pulmory embolism (choice=Segmental)
					Type of Pulmory embolism (choice=Subsegmental)	1st CT pneumothorax	If other findings, specify					chenged the name for ease
2nd CT findings (choice=Not available)	2nd CT findings (choice=Not applicable)	2nd CT findings (choice=Temporarily unavailable)	2nd CT findings (choice=nown)									Subsequent CT findings (choice=Grou Glass Opacity)	Subsequent CT findings (choice=Crazy paving)	Subsequent CTfindings (choice=Multifocal infiltrate)	Subsequent CT findings (choice=Unilateral infiltrate)	Subsequent CT findings (choice=Pleural effusion)	Subsequent CT findings (choice=Pulmory embolism)	SubsequentCT findings (choice=Other)
	Type of Pulmory embolism (choice=Not applicable)	Type of Pulmory embolism (choice=Temporarily uvailable)	Type of Pulmory embolism (choice=nown)	If other findings, specify								(pneumothorax)	added
Date of 3rd CT	3rd CT findings (choice=Grou Glass Opacity)	3rd CT findings (choice=Crazy paving)	3rd CT findings (choice=Multifocal infiltrate)	3rd CT findings (choice=Unilateral infiltrate)
3rd CT findings (choice=Pleural effusion)	3rd CT findings (choice=Pulmory embolism)	3rd CT findings (choice=Other)	3rd CT findings (choice=Not available)	3rd CT findings (choice=Not applicable)
3rd CT findings (choice=Temporarily uvailable)	3rd CT findings (choice=nown)	Type of Pulmory embolism (choice=Pulm trunck)	Type of Pulmory embolism (choice=Main pulm artery)	Type of Pulmory embolism (choice=Segmental)
Type of Pulmory embolism (choice=Subsegmental)	Type of Pulmory embolism (choice=Not available)	Type of Pulmory embolism (choice=Not applicable)	Type of Pulmory embolism (choice=Temporarily uvailable)	If other findings, specify
If yes: (choice=A/H3N2, Positive)	If yes: (choice=A/H1N1pdm09, Positive)	If yes: (choice=A/H7N9, Positive)	If yes: (choice=A/H5N1, Positive)
												these represent the whole ICU culture /all the cultures combined together)
												RespICU Stay Gram positive bacteria (no specific resistance pattern))	RespICU Stay =Vancomycin resistant Enterococcus (VRE))	RespICU Stay =Staph aureus (MSSA))	RespICU Stay =Staph aureus (MRSA))	RespICU Stay =Enterobacteriaceae (sensitive))	RespICU Stay =Enterobacteriaceae (ESBL))	RespICU Stay =Enterobacteriaceae (CRE))	RespICU Stay =Enterobacteriaceae (MDR))	RespICU Stay =Enterobacteriaceae (XDR))	RespICU Stay =Pseudomos (Sensitive))	RespICU Stay =Pseudomos (MDR))	RespICU Stay =Pseudomos (XDR))	RespICU Stay=Acinetobacter (sensitive))	RepsICU Stay=Acinetobacter (MDR))	RespICU Stay =Aspergillus)	RespICUStayStenotrophomonas	RespICU Stay =Candida)
												BloodICU Stay Gram positive bacteria (no specific resistance pattern))	BloodICU Stay =Vancomycin resistant Enterococcus (VRE))	BloodICU Stay =Staph aureus (MSSA))	BloodICU Stay =Staph aureus (MRSA))	BloodICU Stay =Enterobacteriaceae (sensitive))	BloodICU Stay =Enterobacteriaceae (ESBL))	BloodICU Stay =Enterobacteriaceae (CRE))	BloodICU Stay =Enterobacteriaceae (MDR))	BloodICU Stay =Enterobacteriaceae (XDR))	blood ICU Stay =Pseudomos (Sensitive))	bloodICU Stay =Pseudomos (MDR))	bloodICU Stay =Pseudomos (XDR))	BloodICU Stay=Acinetobacter (sensitive))	BloodICU Stay=Acinetobacter (MDR))	BloodICU Stay =Aspergillus)	RespICUStayStenotrophomonas	BloodICU Stay =Candida)
					all the cultures are cleaned (from :			to:
					K.4.1.1 1st Collection date:			K.4.6.4 Pathogen Detected (if positive) (choice=Other)
												K.4.1.4 Pathogen Detected (stenotophomonas)
[truncated: 6 more columns]

## Sheet: sheet 5from medication
deleted colomns					cleaned					half cleaned			added /changed			added codes					ECMO data (N)
K.4.5.4 Pathogen Detected (if positive) (choice=Not available)	K.4.5.4 Pathogen Detected (if positive) (choice=Not applicable)	K.4.5.4 Pathogen Detected (if positive) (choice=Temporarily unavailable)	K.4.5.4 Pathogen Detected (if positive) (choice=unknown)
Microbiological testing complete?					L.2 LMWH Dose (mg)	L.2 The new LMWH dose (mg)	L.2 LMWH Dose (mg)	L.2 LMWH Frequency					1st LMWH dose (mg/kg/day)	2nd LMWH dose (mg/kg/min)
					L.2 LMWH start date	L.2 LMWH end date
L.2 Anticoagulation administration during hospitalization:(choose all given from hospital admission till day 28 of ICU admission) (choice=Not available)	L.2 Anticoagulation administration during hospitalization:(choose all given from hospital admission till day 28 of ICU admission) (choice=Not applicable)	L.2 Anticoagulation administration during hospitalization:(choose all given from hospital admission till day 28 of ICU admission) (choice=Temporarily unavailable)	L.2 Anticoagulation administration during hospitalization:(choose all given from hospital admission till day 28 of ICU admission) (choice=unknown)		L.2.1 If other, please specify:								L.2.1 Indication for anticoagulation: (choice=ACS/MI)
L.3 If yes, (you can choose >1): (choice=Other)					L.2.1 Indication for anticoagulation: (choice=DVT prophylaxis only)	L.2.1 Indication for anticoagulation: (choice=PE (history of PE prior to hospital admission))	L.2.1 Indication for anticoagulation: (choice=PE (diagnosed during current admission))	L.2.1 Indication for anticoagulation: (choice=DVT (New diagnosed during current hospital admission))
L.3 If yes, (you can choose >1): (choice=Not available)	L.3 If yes, (you can choose >1): (choice=Not applicable)	L.3 If yes, (you can choose >1): (choice=Temporarily unavailable)	L.3 If yes, (you can choose >1): (choice=unknown)		L.2.1 Indication for anticoagulation: (choice=Atrial fibrillation)	L.2.1 Indication for anticoagulation: (choice=Past history of thrombo-embolic disease)	L.2.1 Indication for anticoagulation: (choice=Part of COVID 19 therapy protocol)	L.2.1 If other, please specify:
L.3 If other, please specify:					L.3 If yes, (you can choose >1): (choice=Methylprednisolone)	L.3 If yes, (you can choose >1): (choice=Dexamethasone)	L.3 If yes, (you can choose >1): (choice=Other)
L.3 Start date of other medication	L.3 End date of other medication	L.3 Total dose of other medication per day			L.3 Methylprednisolone start date	L.3 Methylprednisolone end date	L.3 Methylprednisolone total dose per day (mg)
